# Supplementary material for: Synthesis of Novel 2-Thiouracil-5-Sulfonamide Derivatives as Potent Inducers of Cell Cycle Arrest and CDK2A Inhibition Supported by Molecular Docking
Source: MDPI journal article supplement (doi:10.3390/ijms222111957), 2021-11-04

# Cpd 2 H-NMR

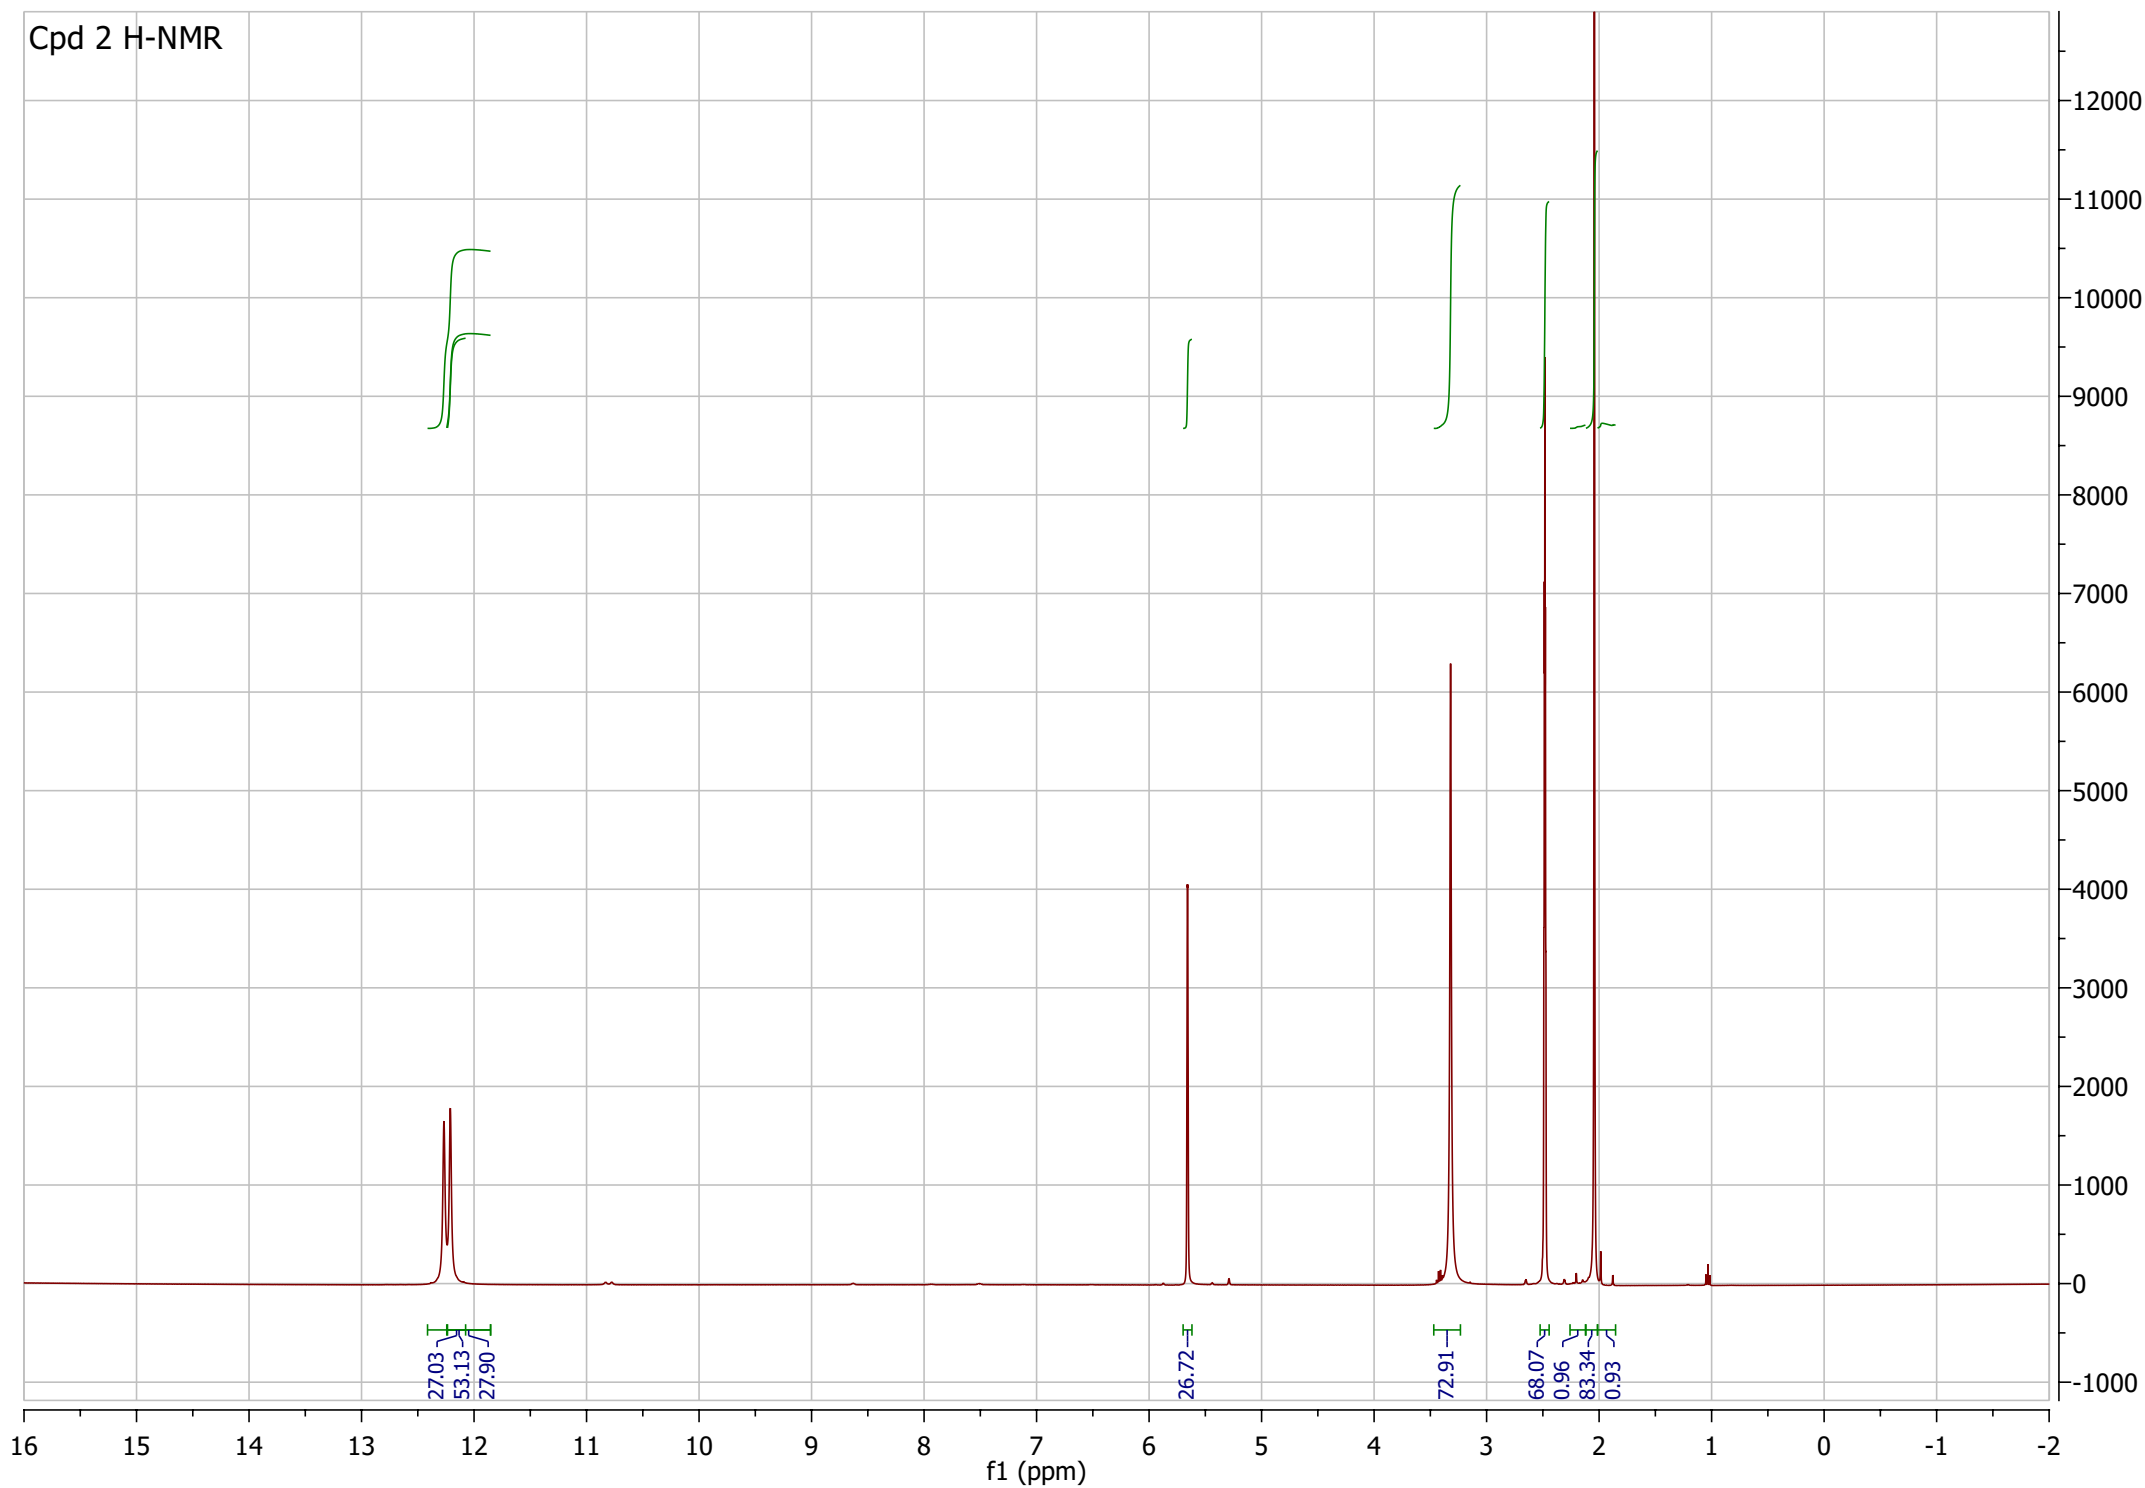

Cpd 2

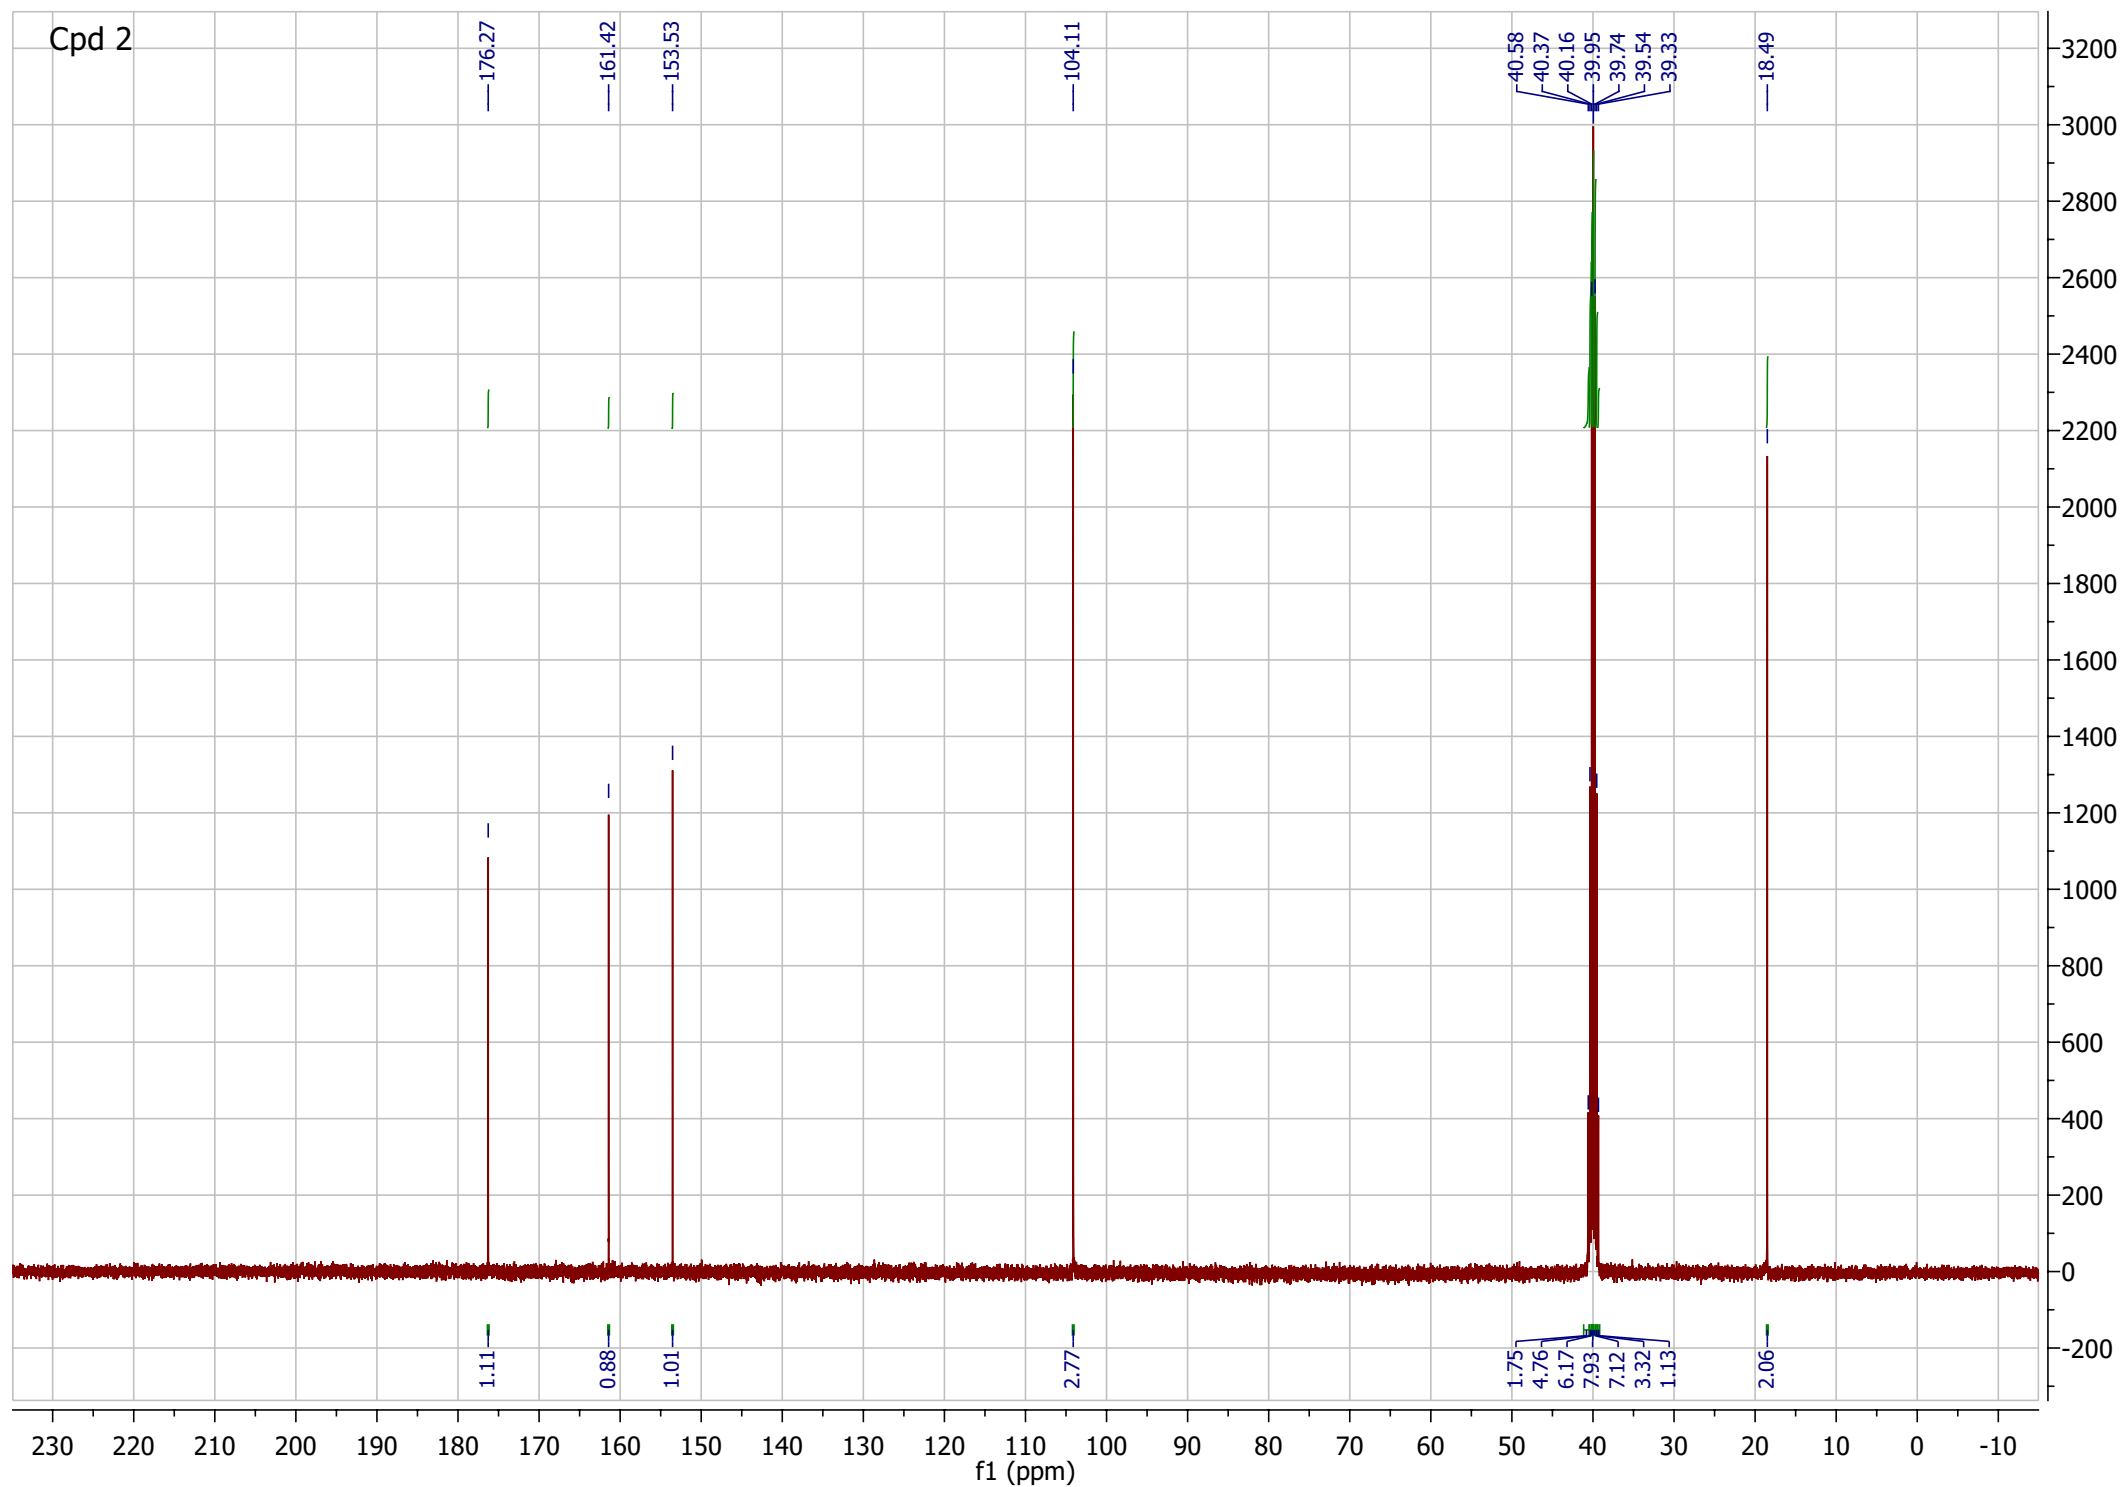

Cpd 3

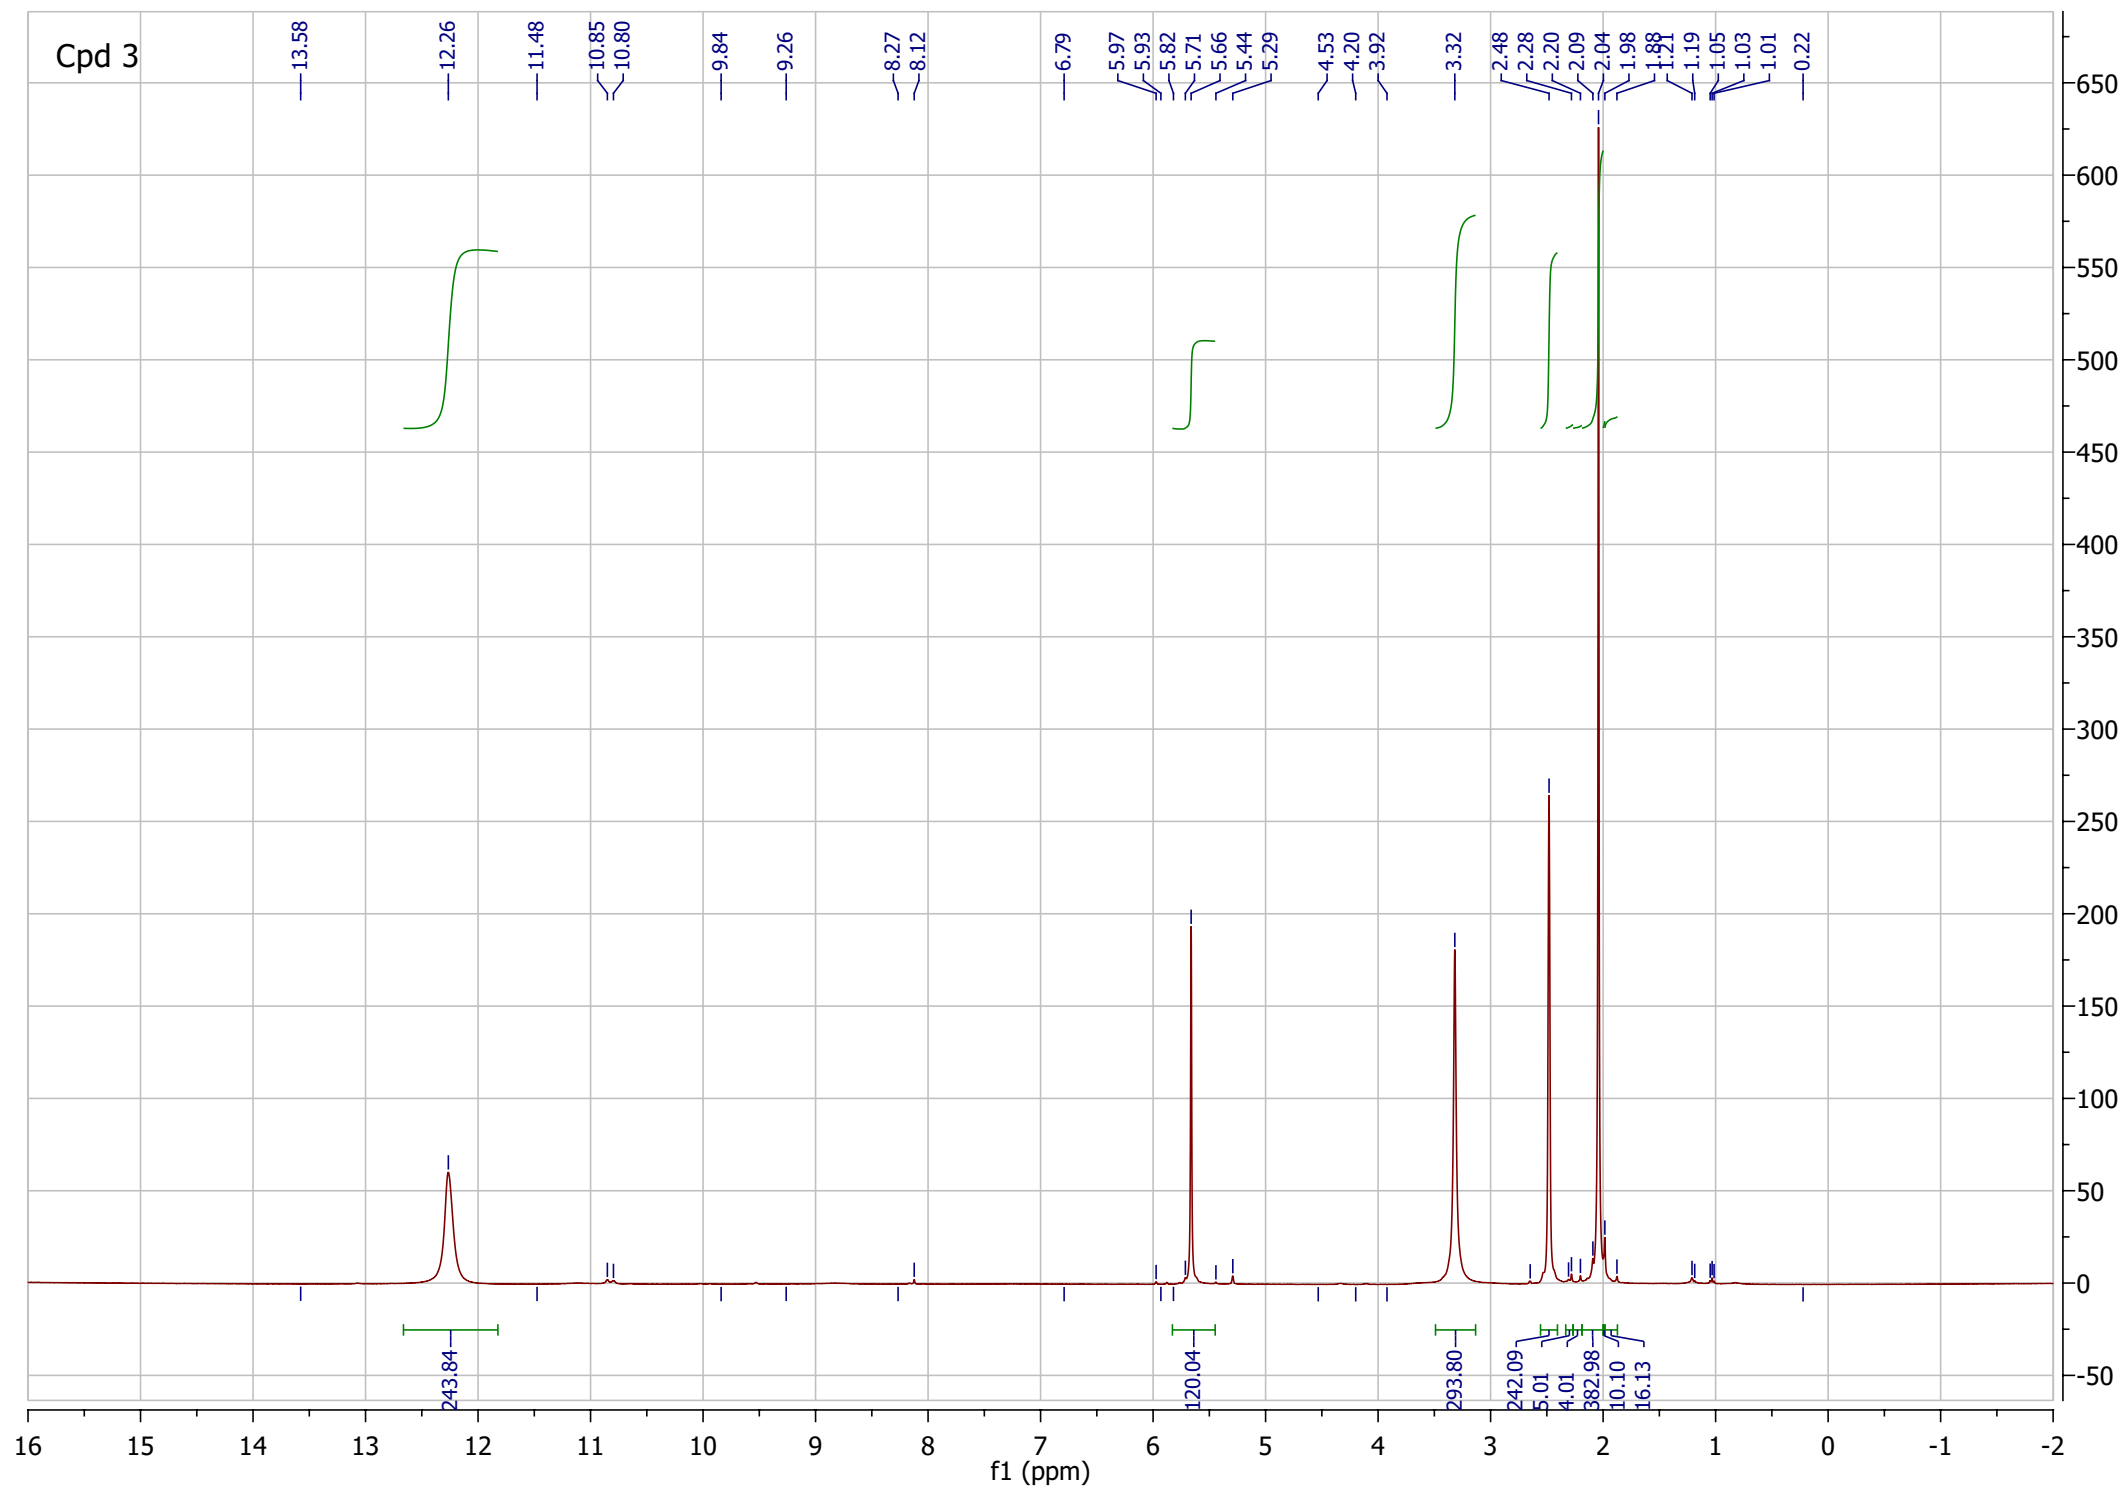

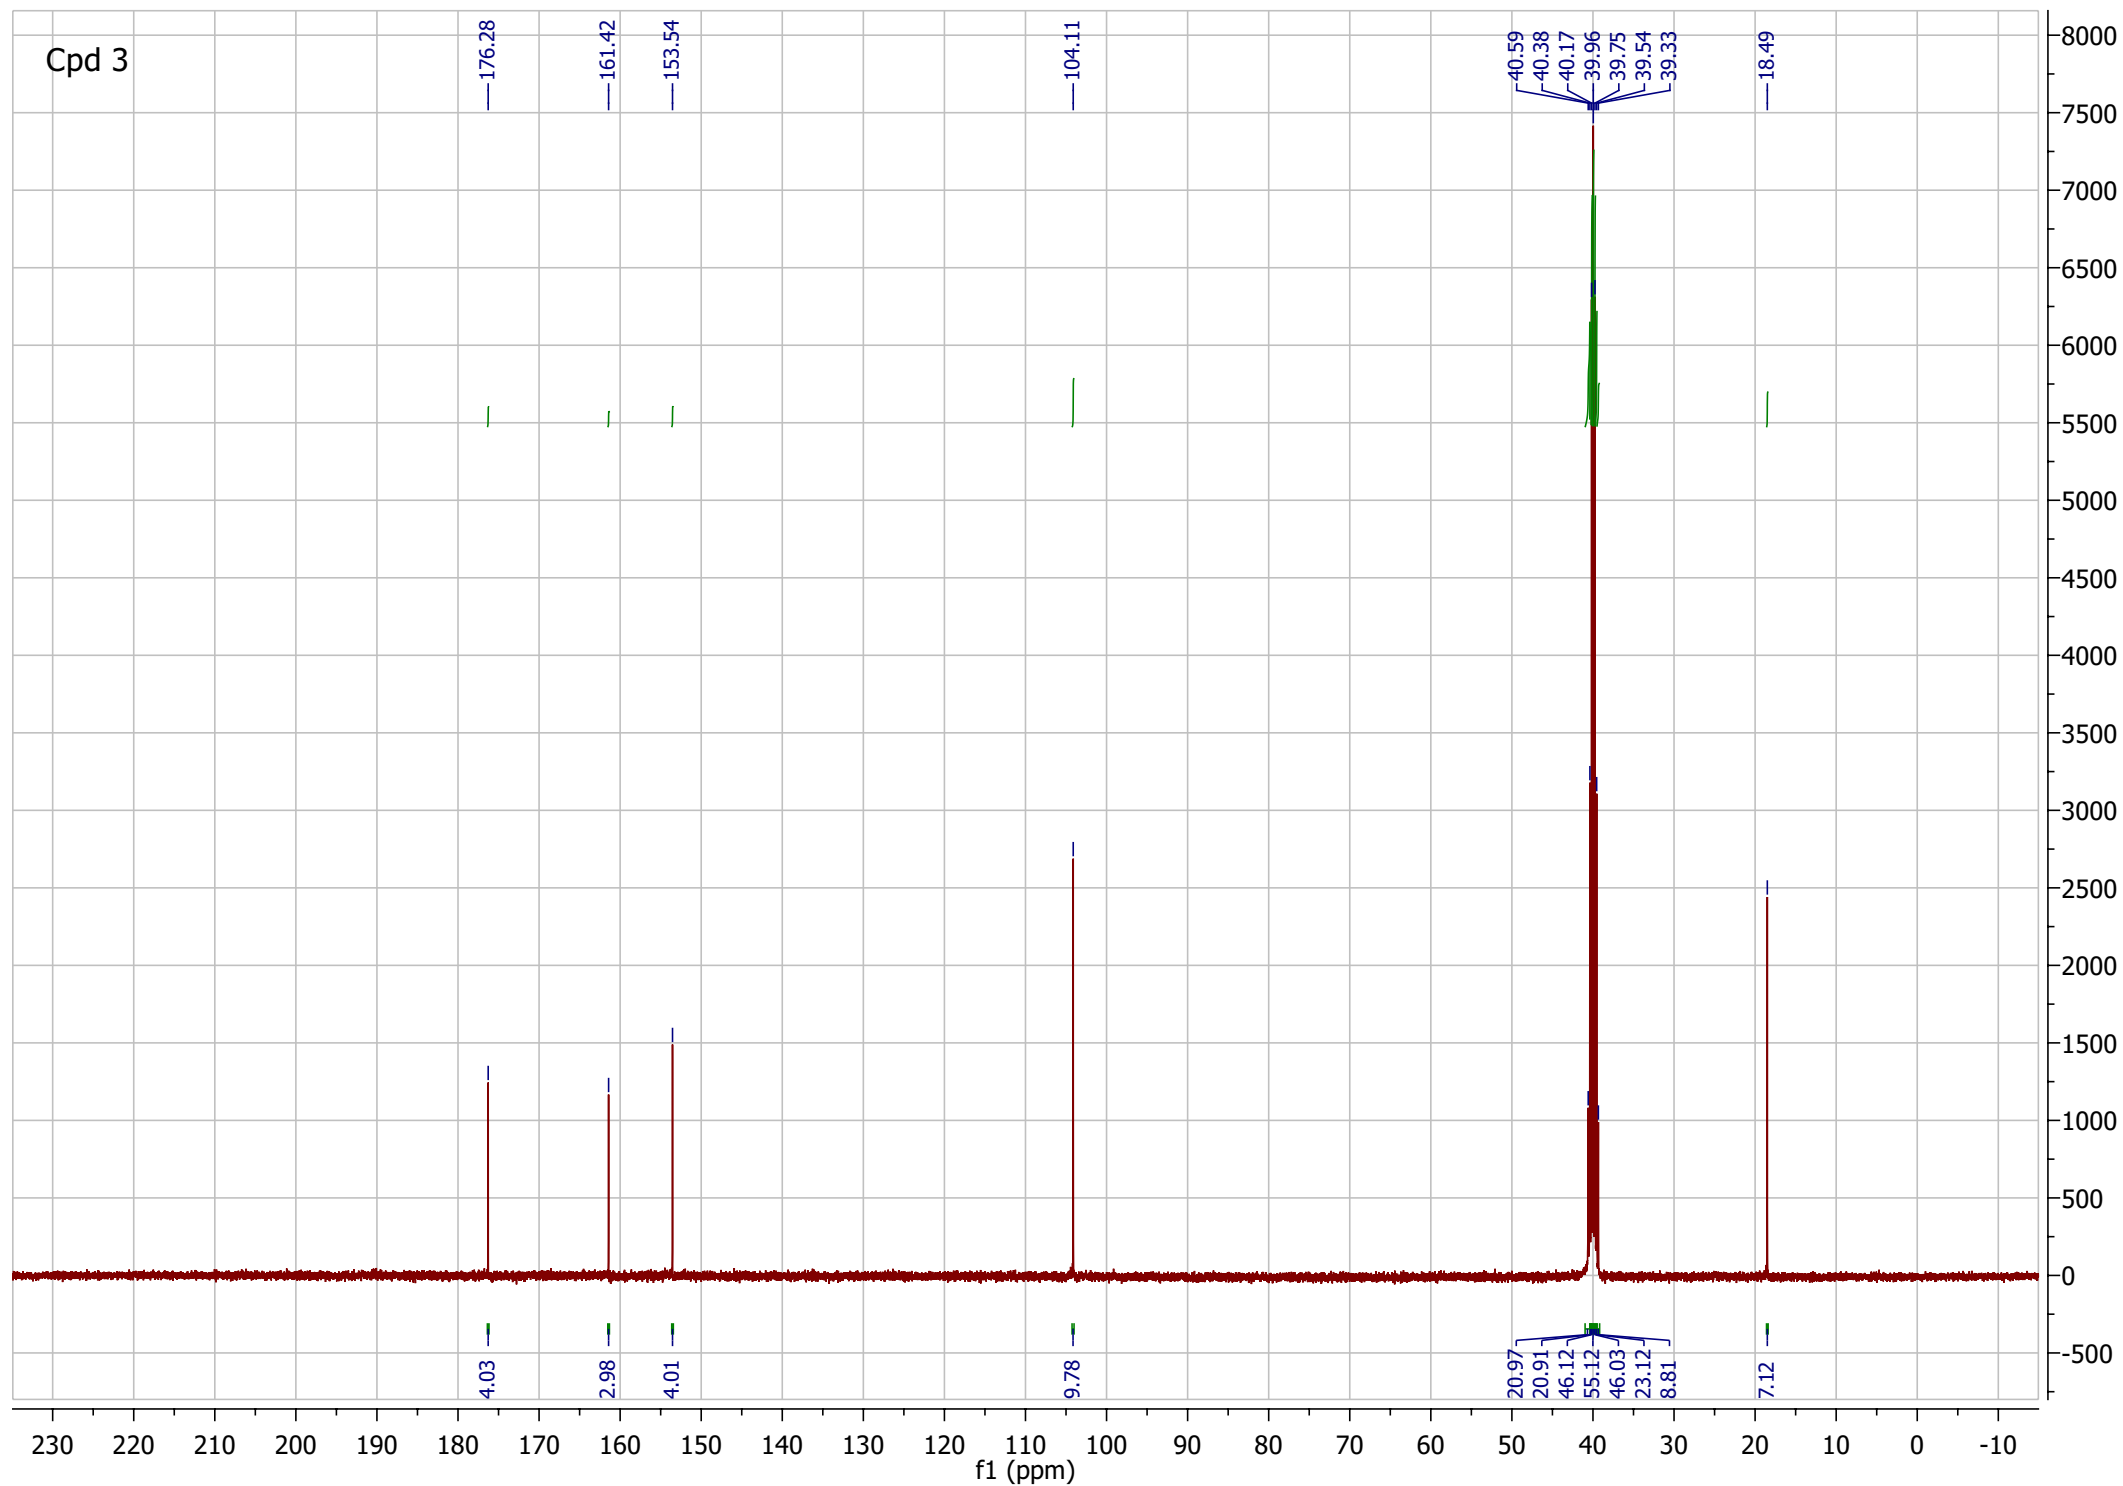

Cpd 4

H-NMR

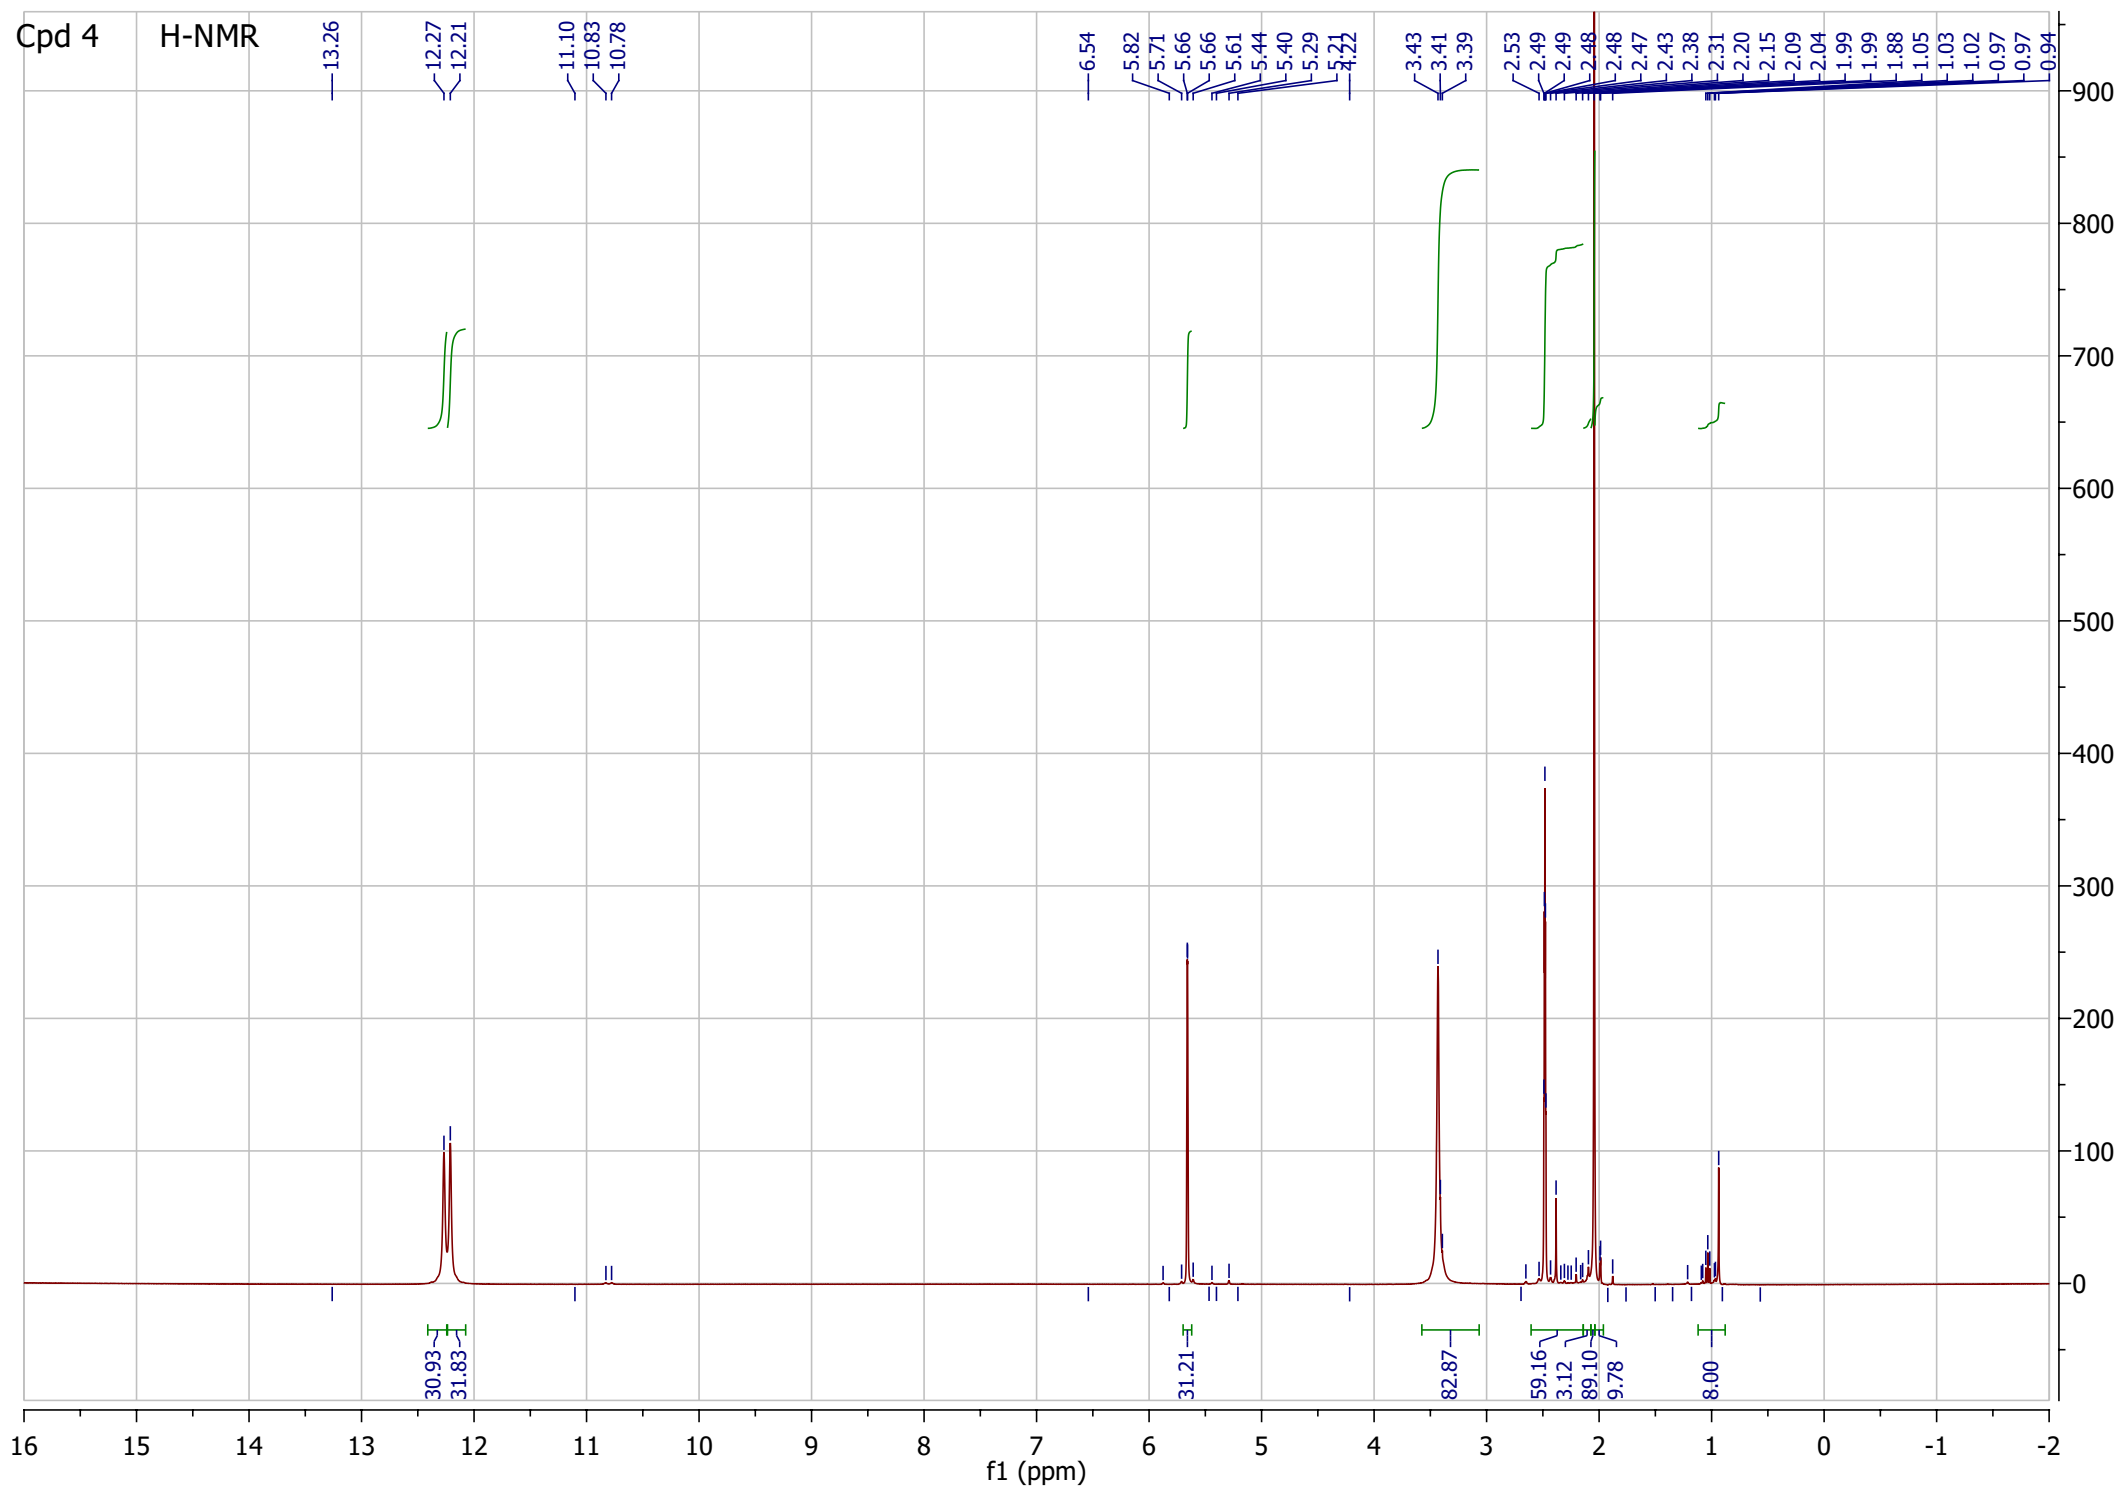

Cpd 4 C13 NMR

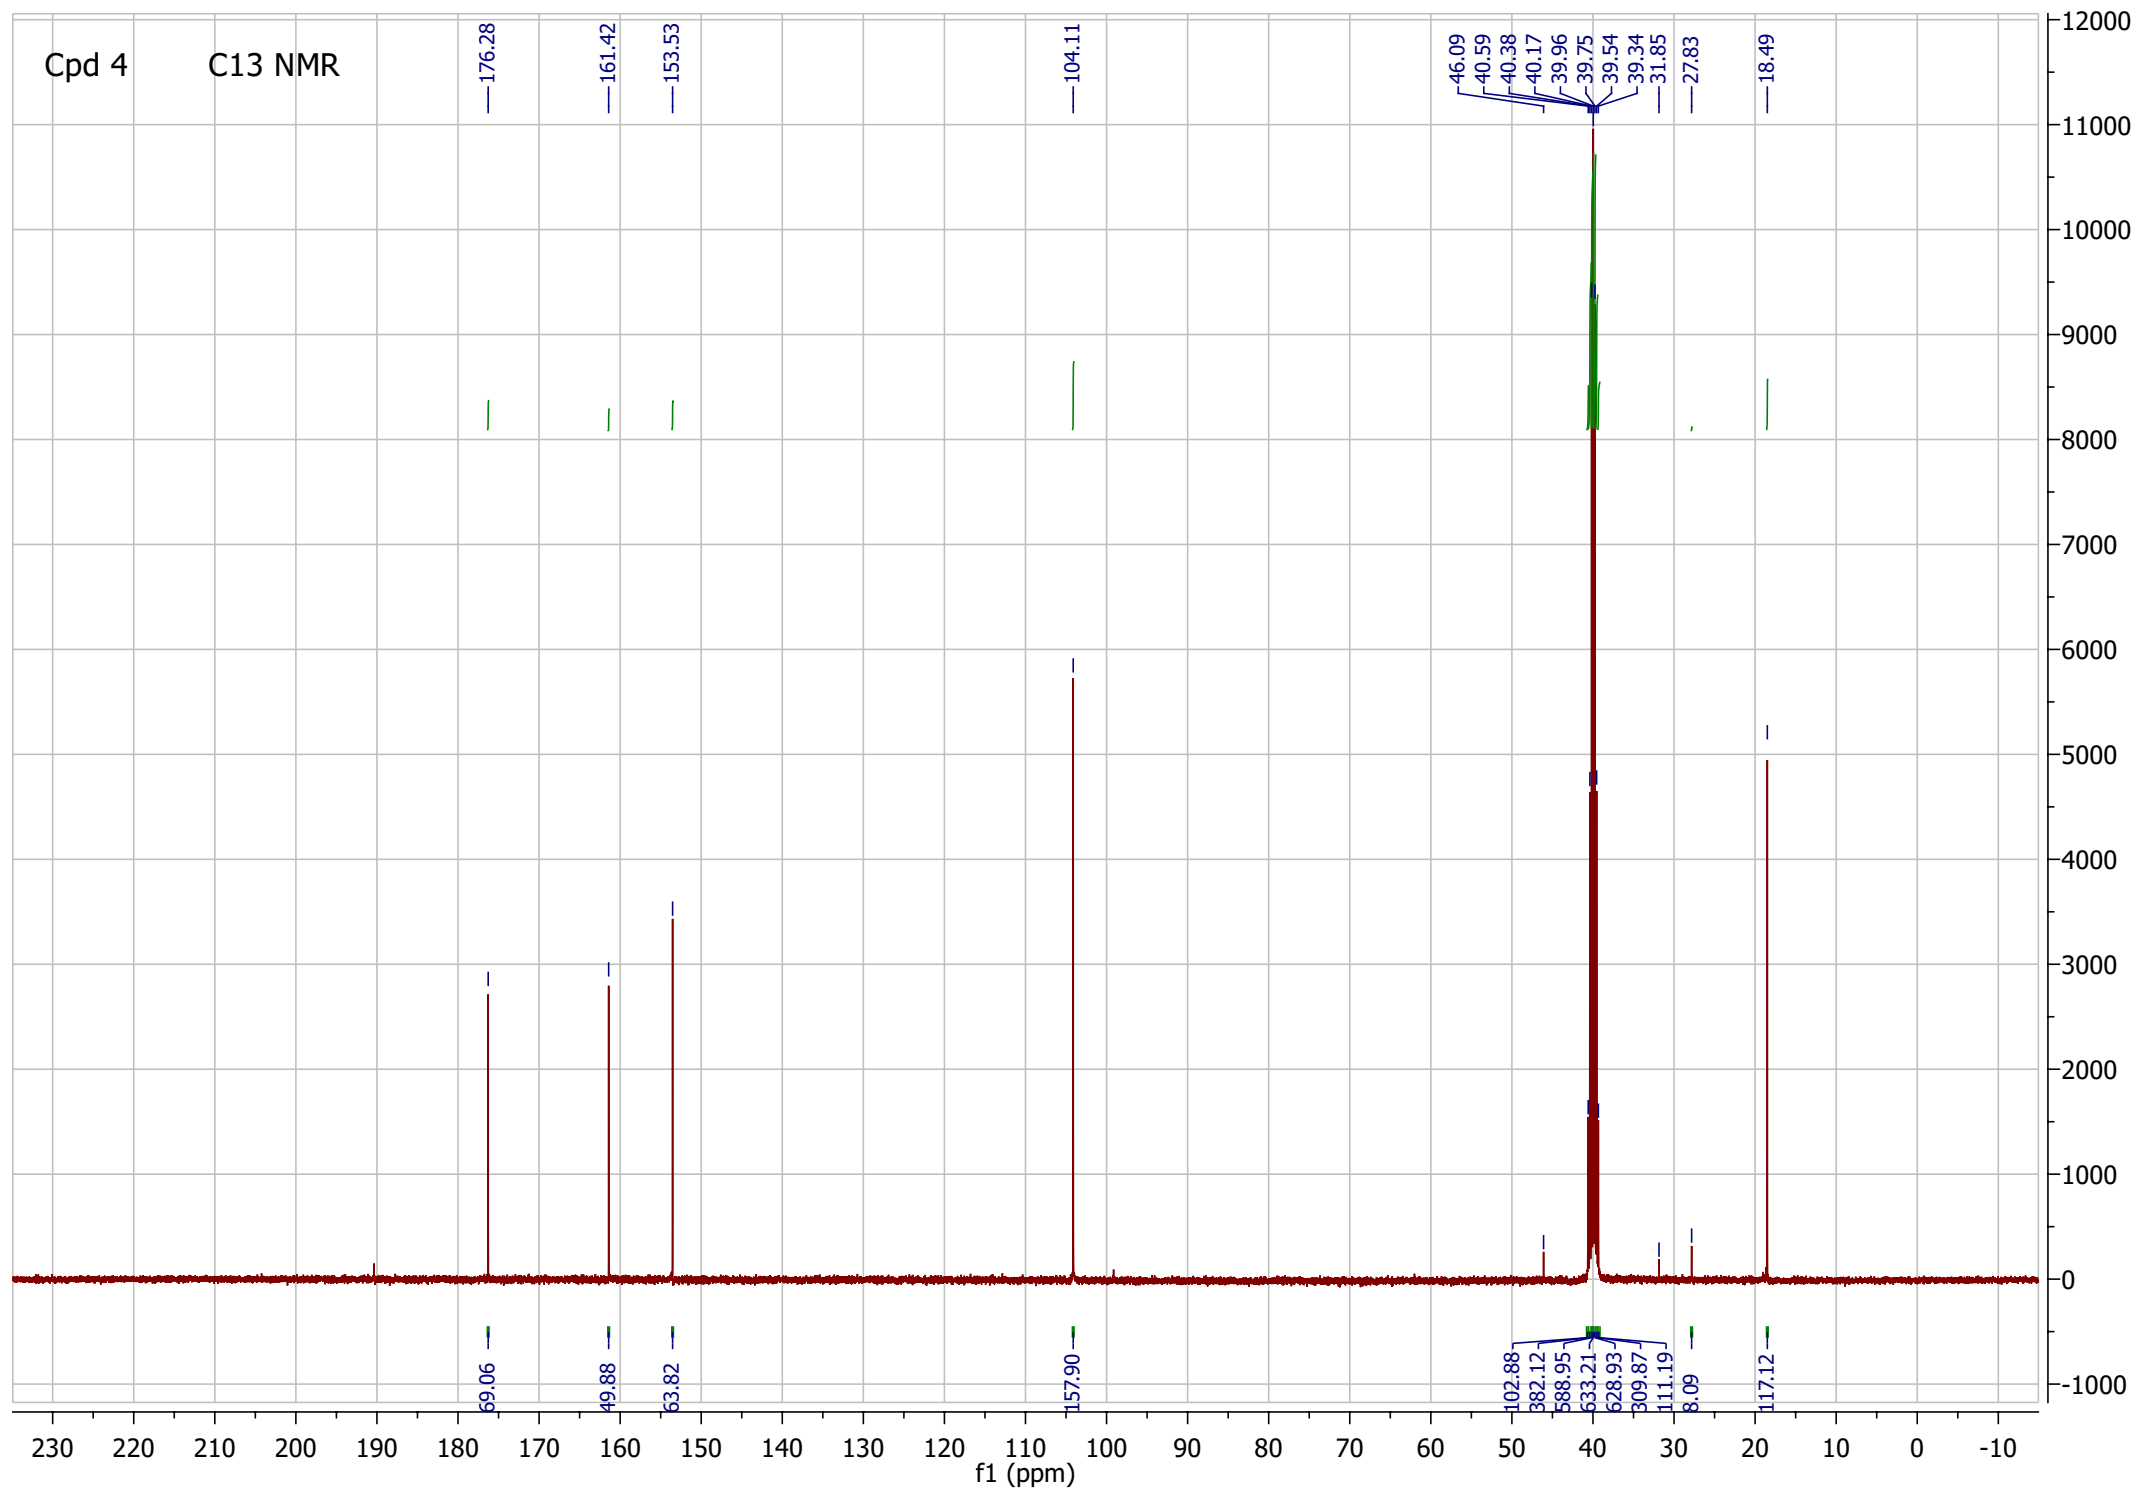

Cpd 5

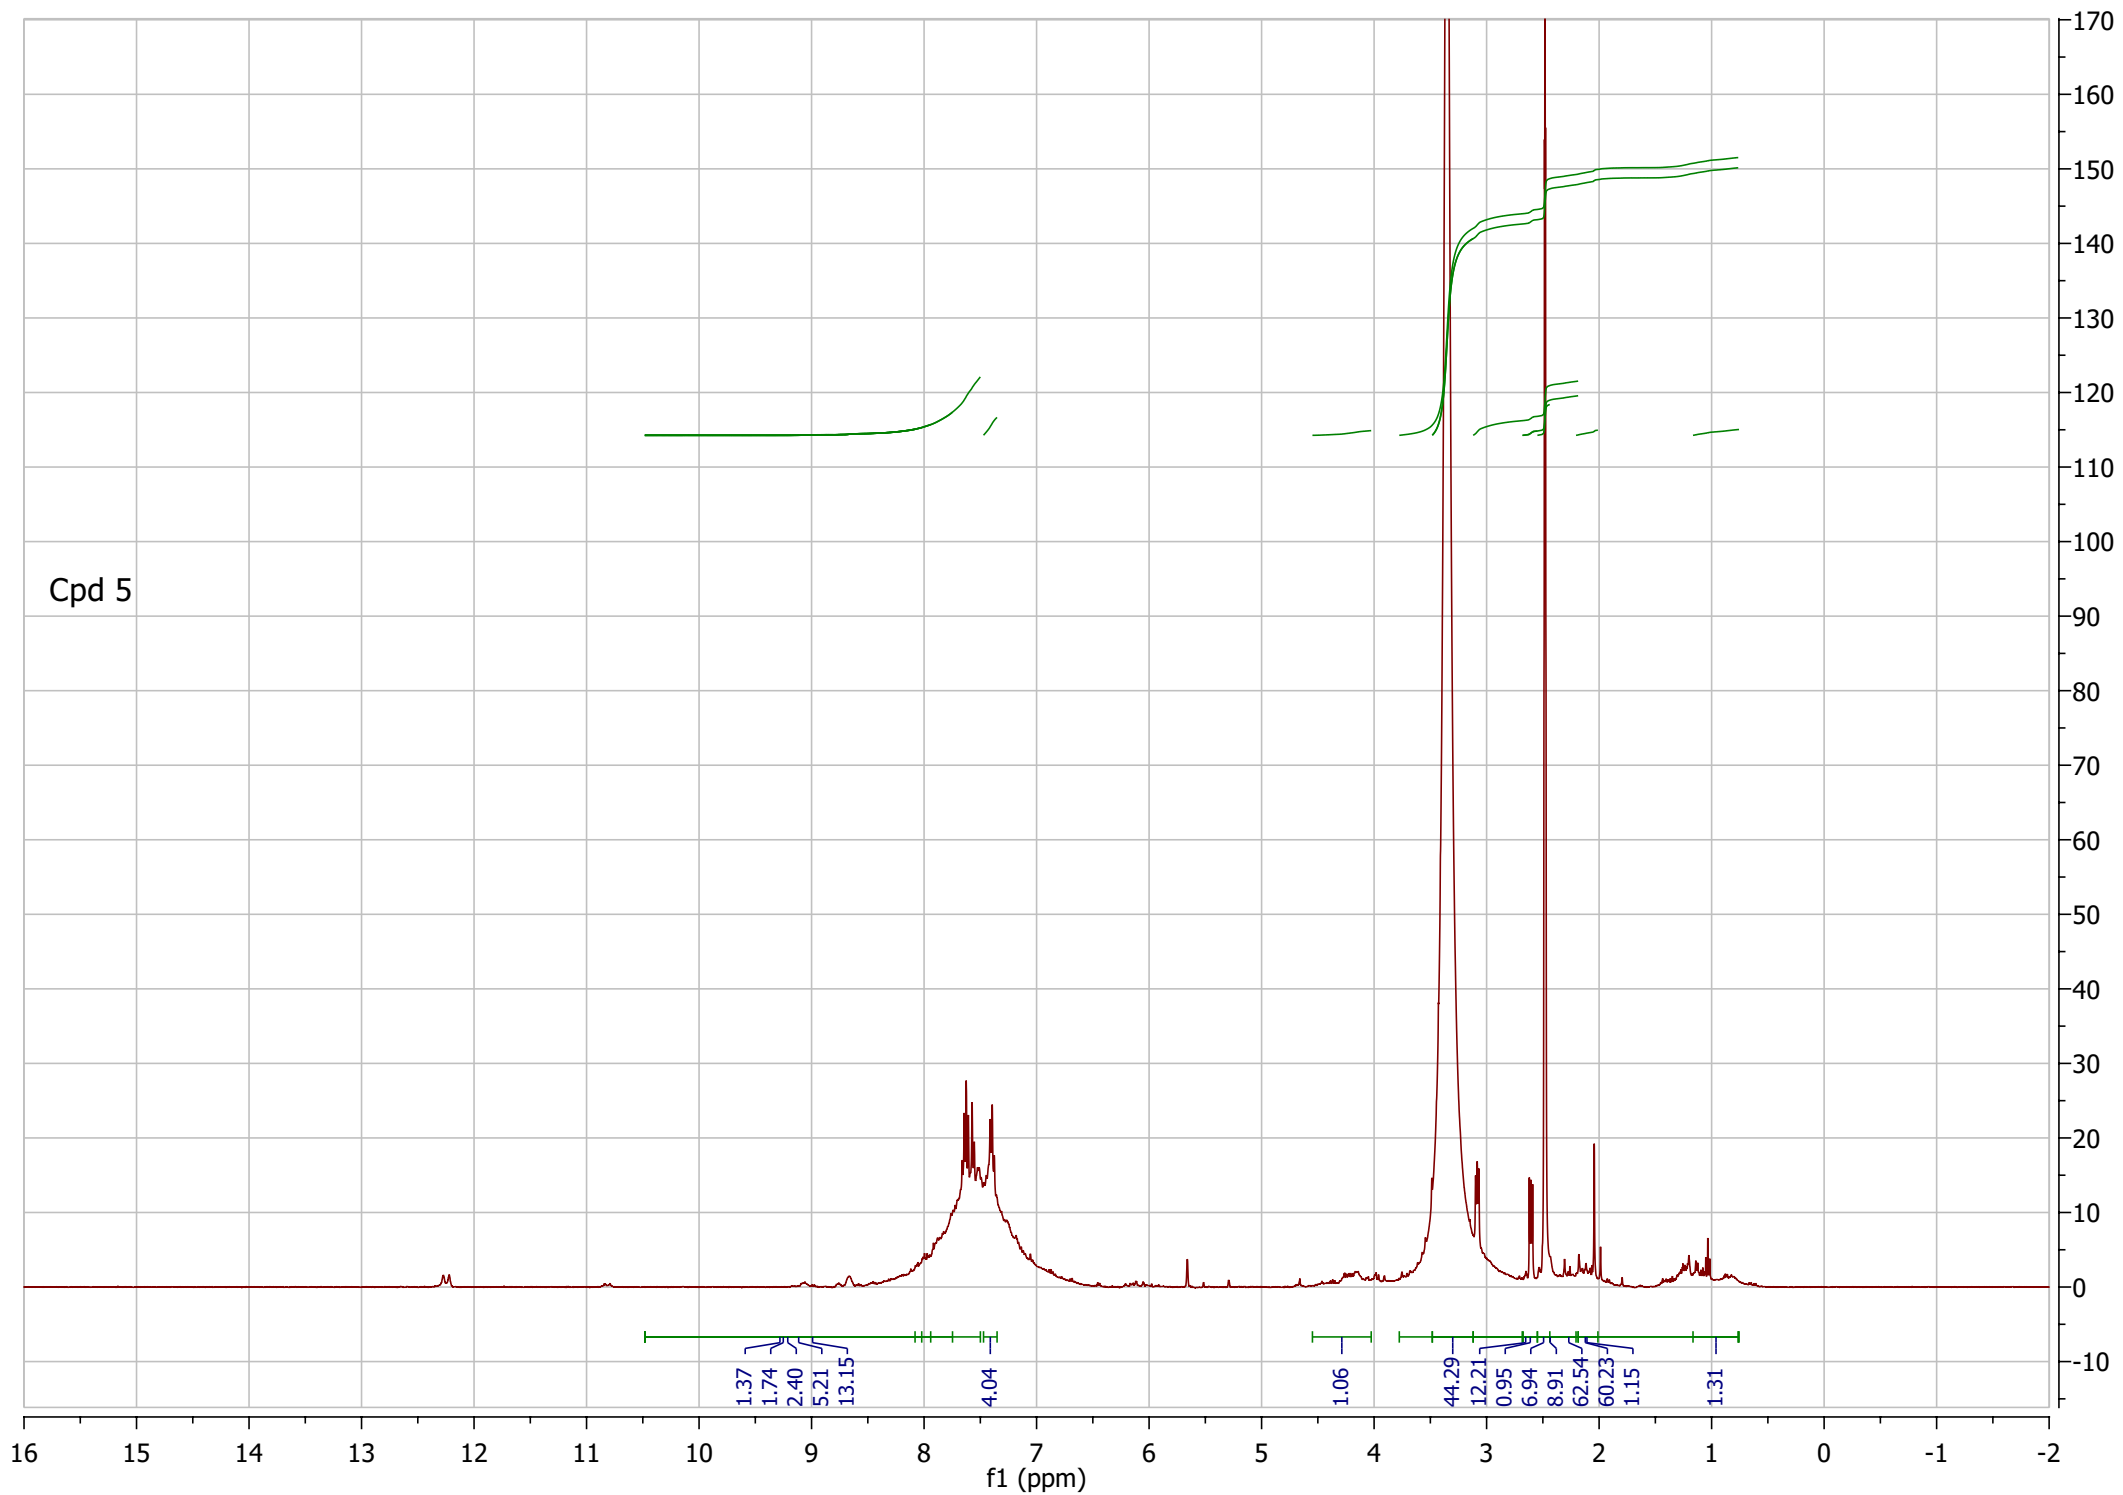

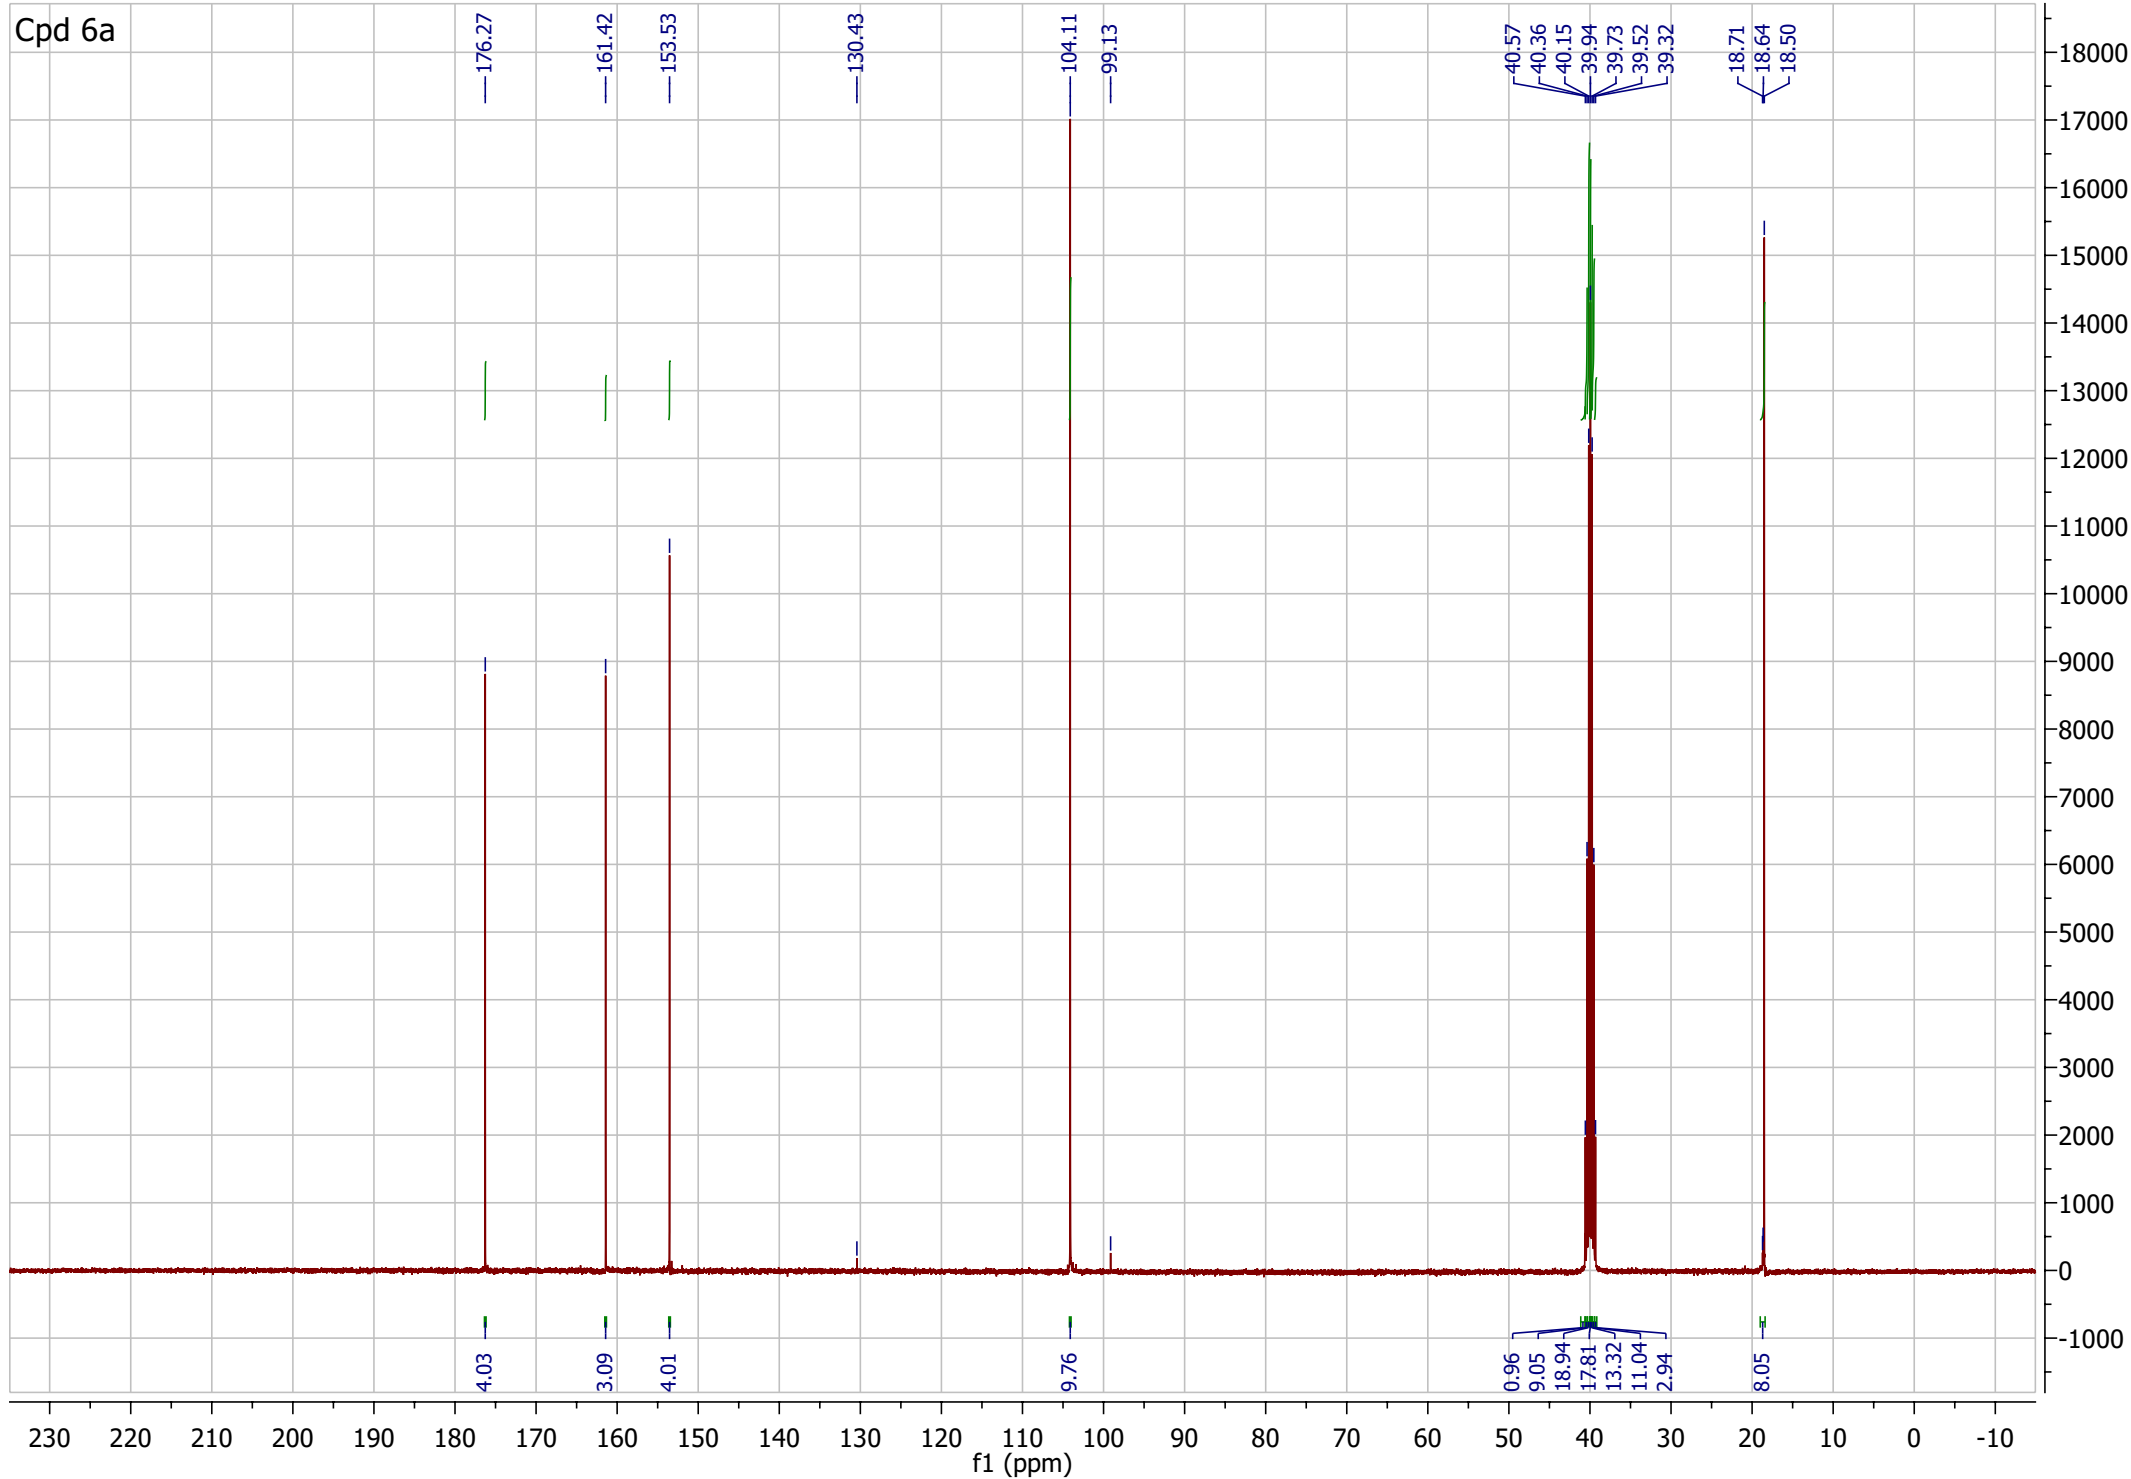



Cpd 6a H-NMR

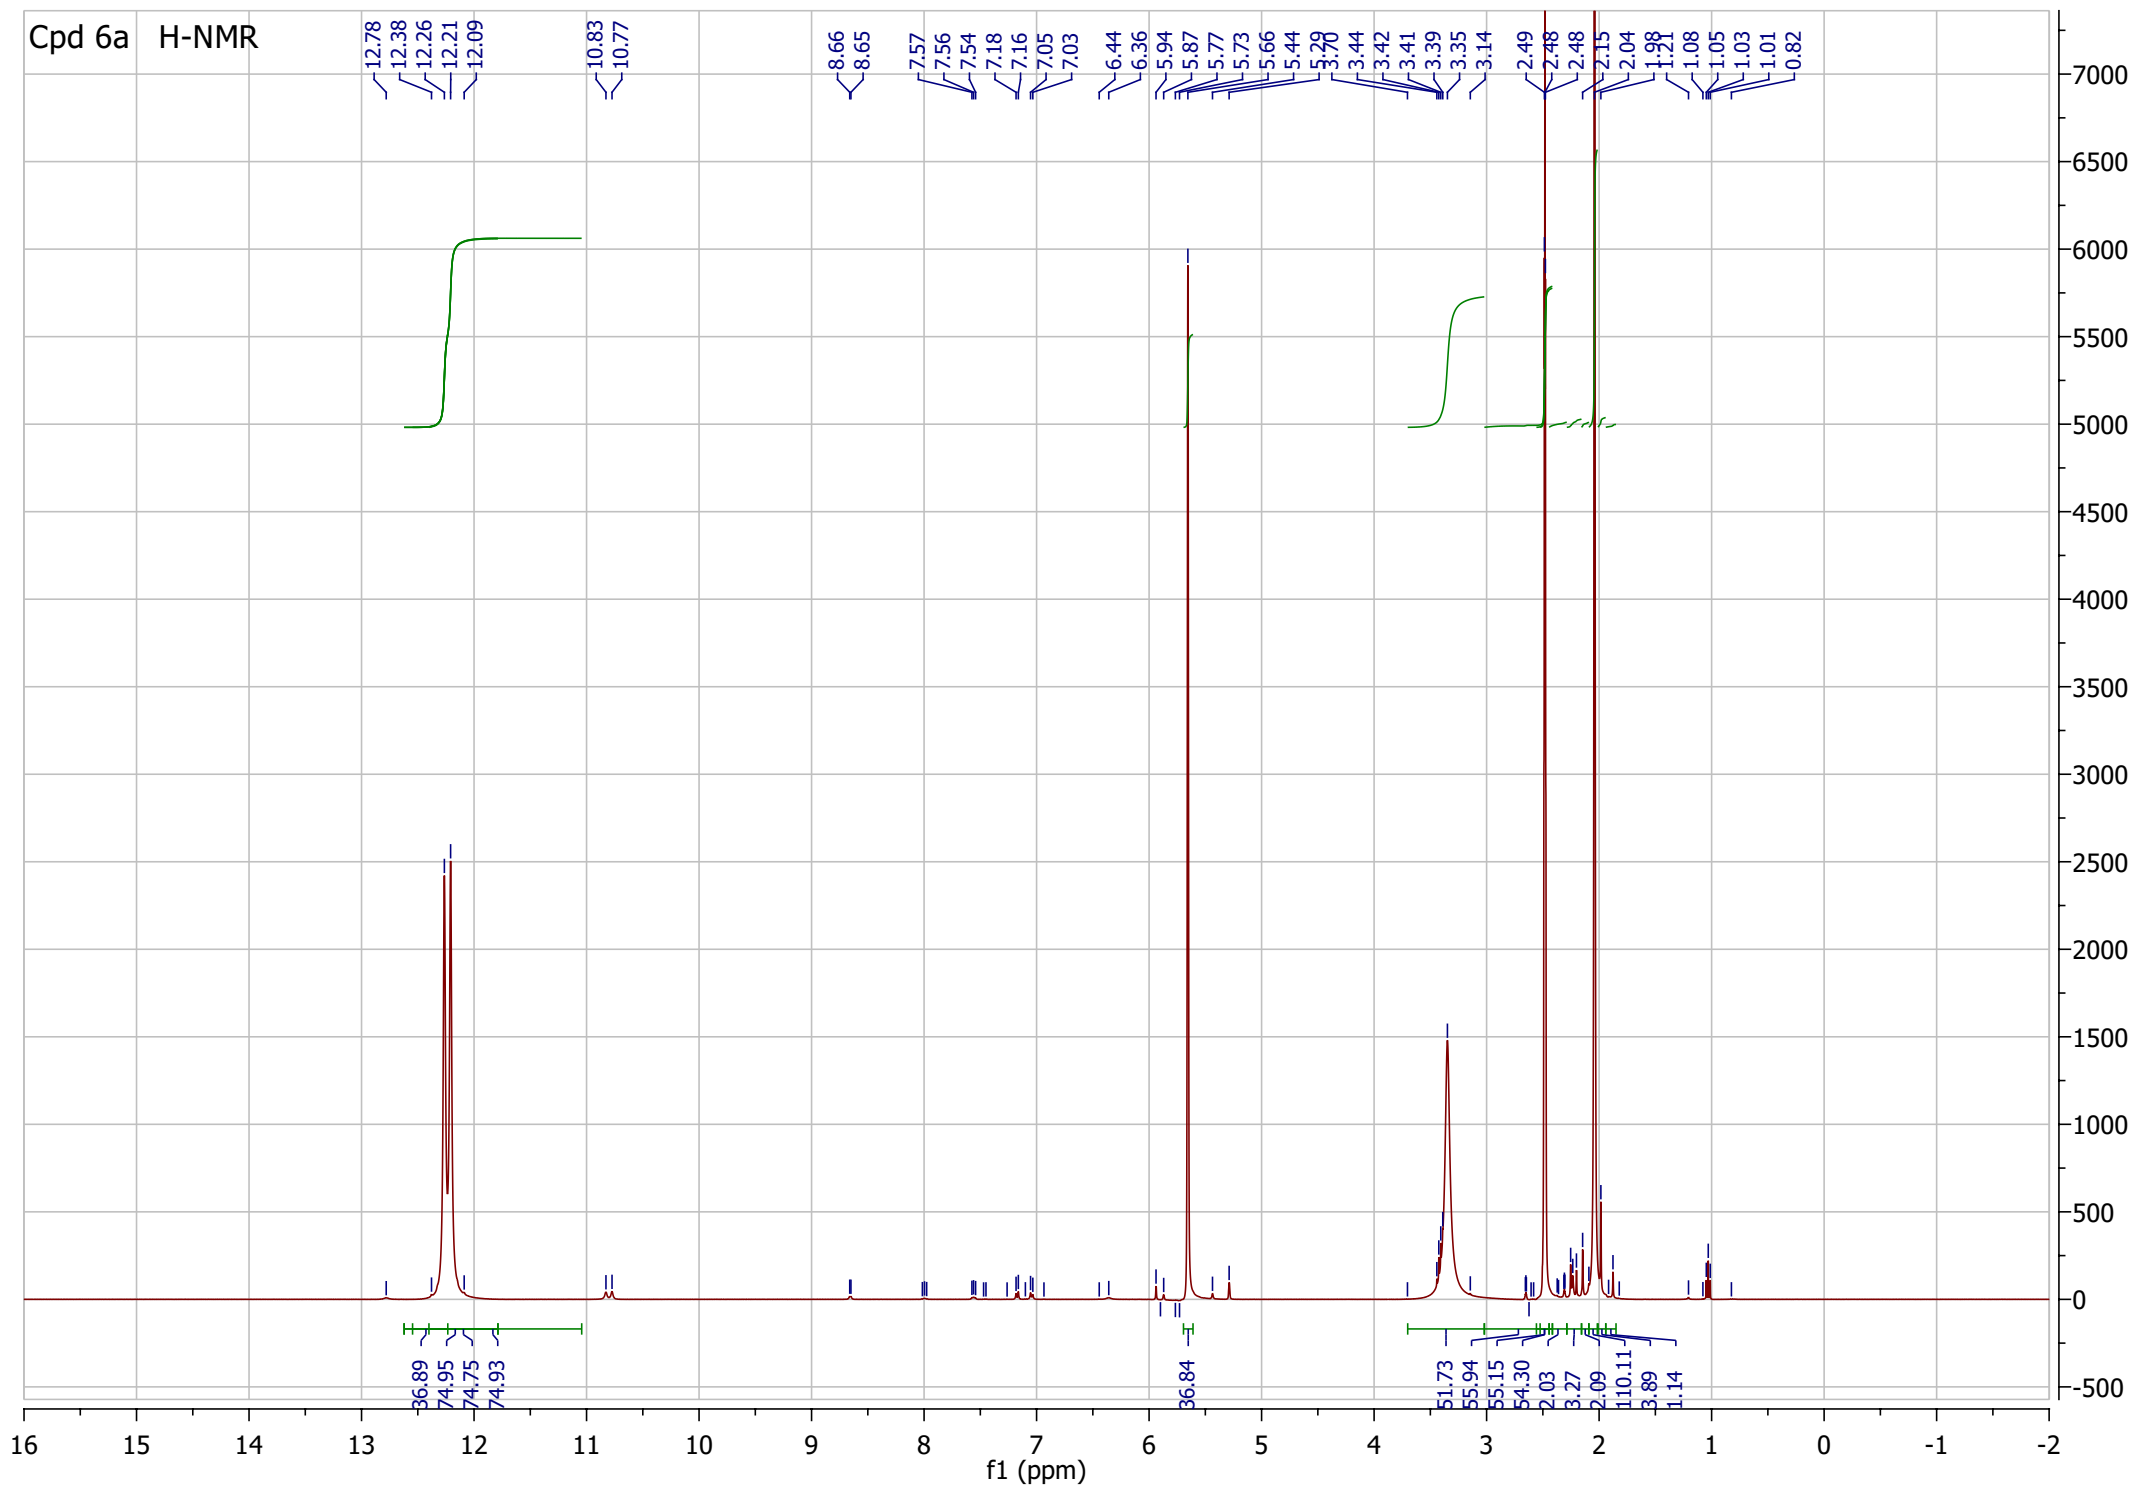

Cpd 6b

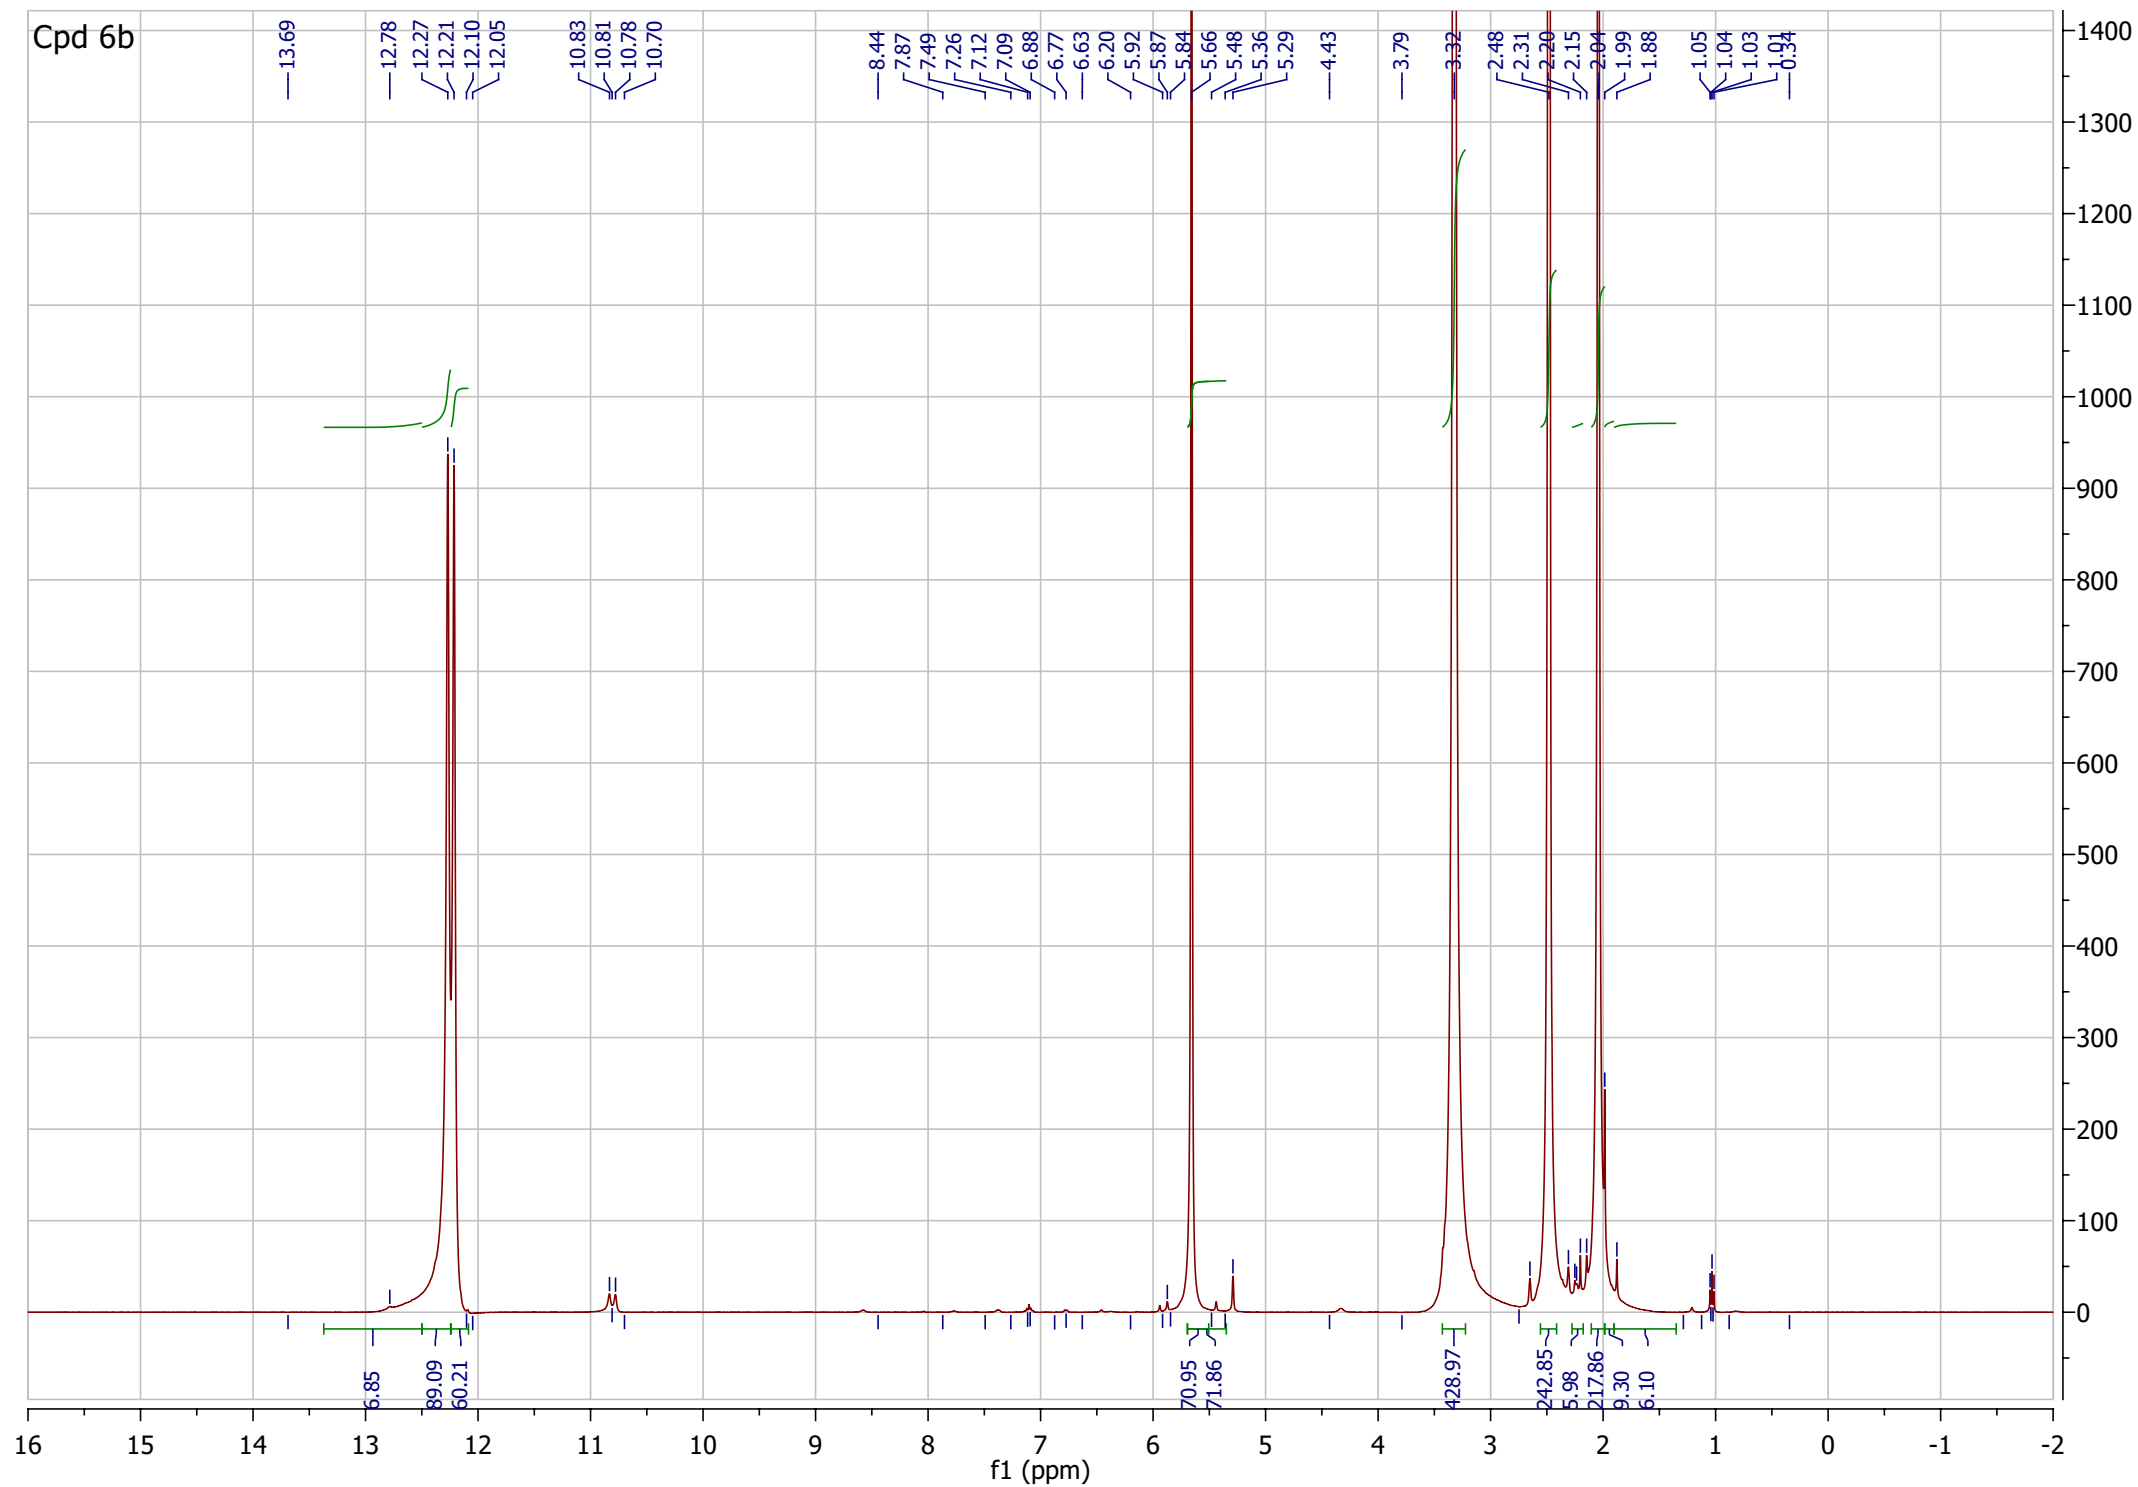

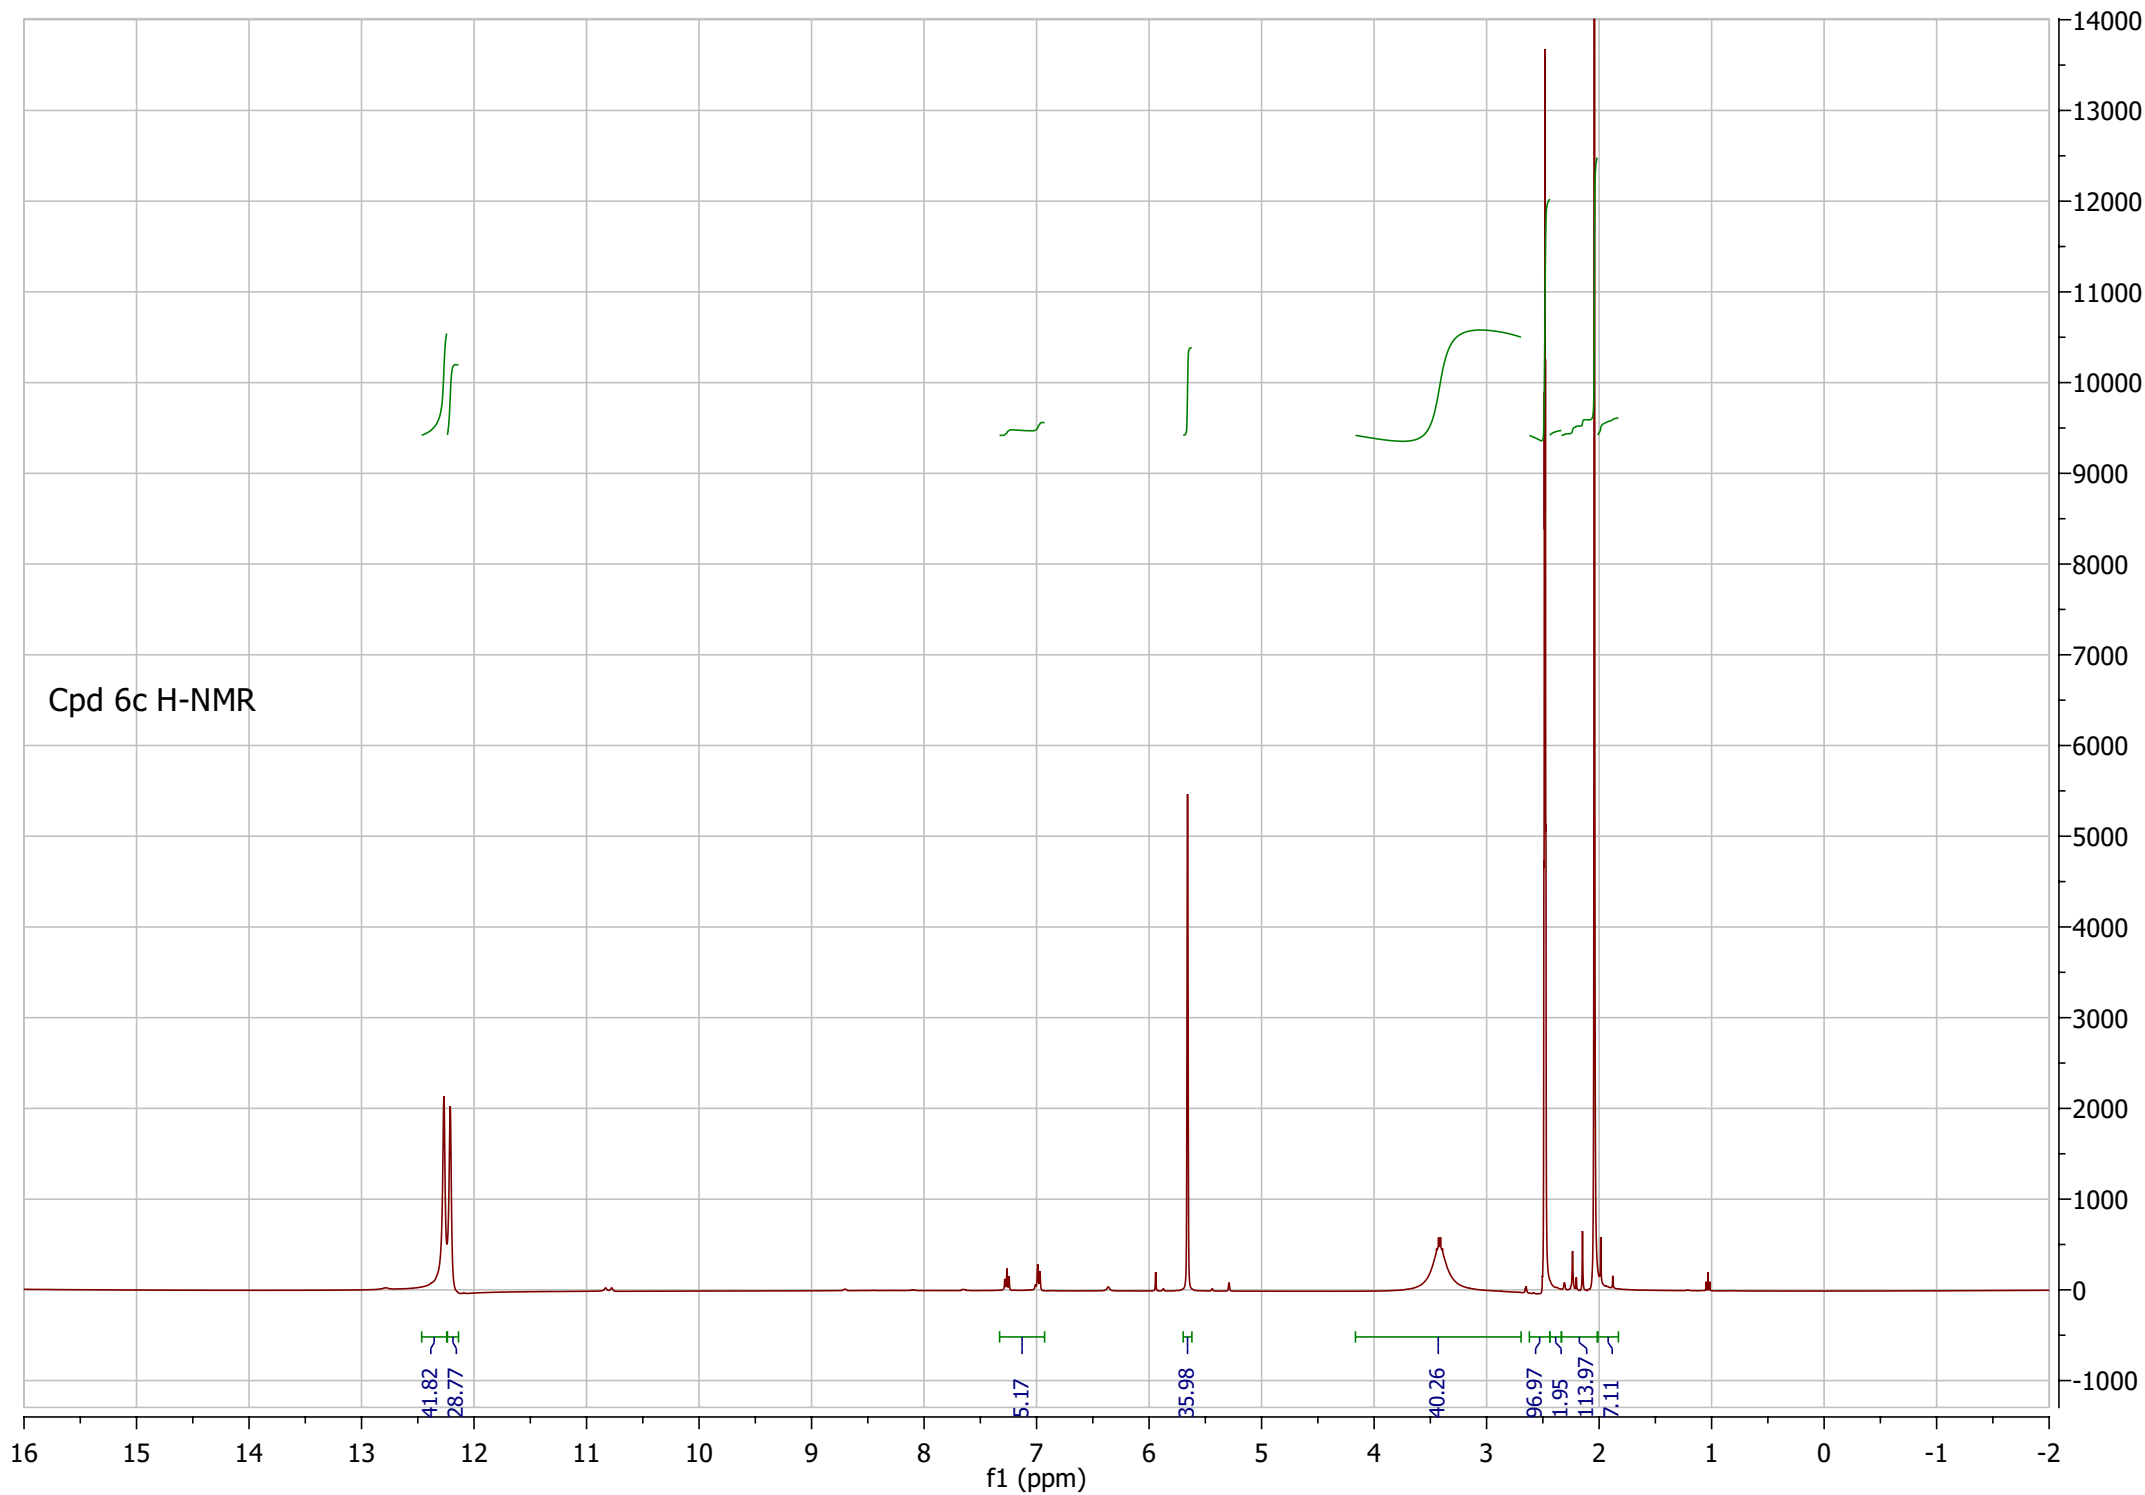

Cpd 6c H-NMR(D2O)

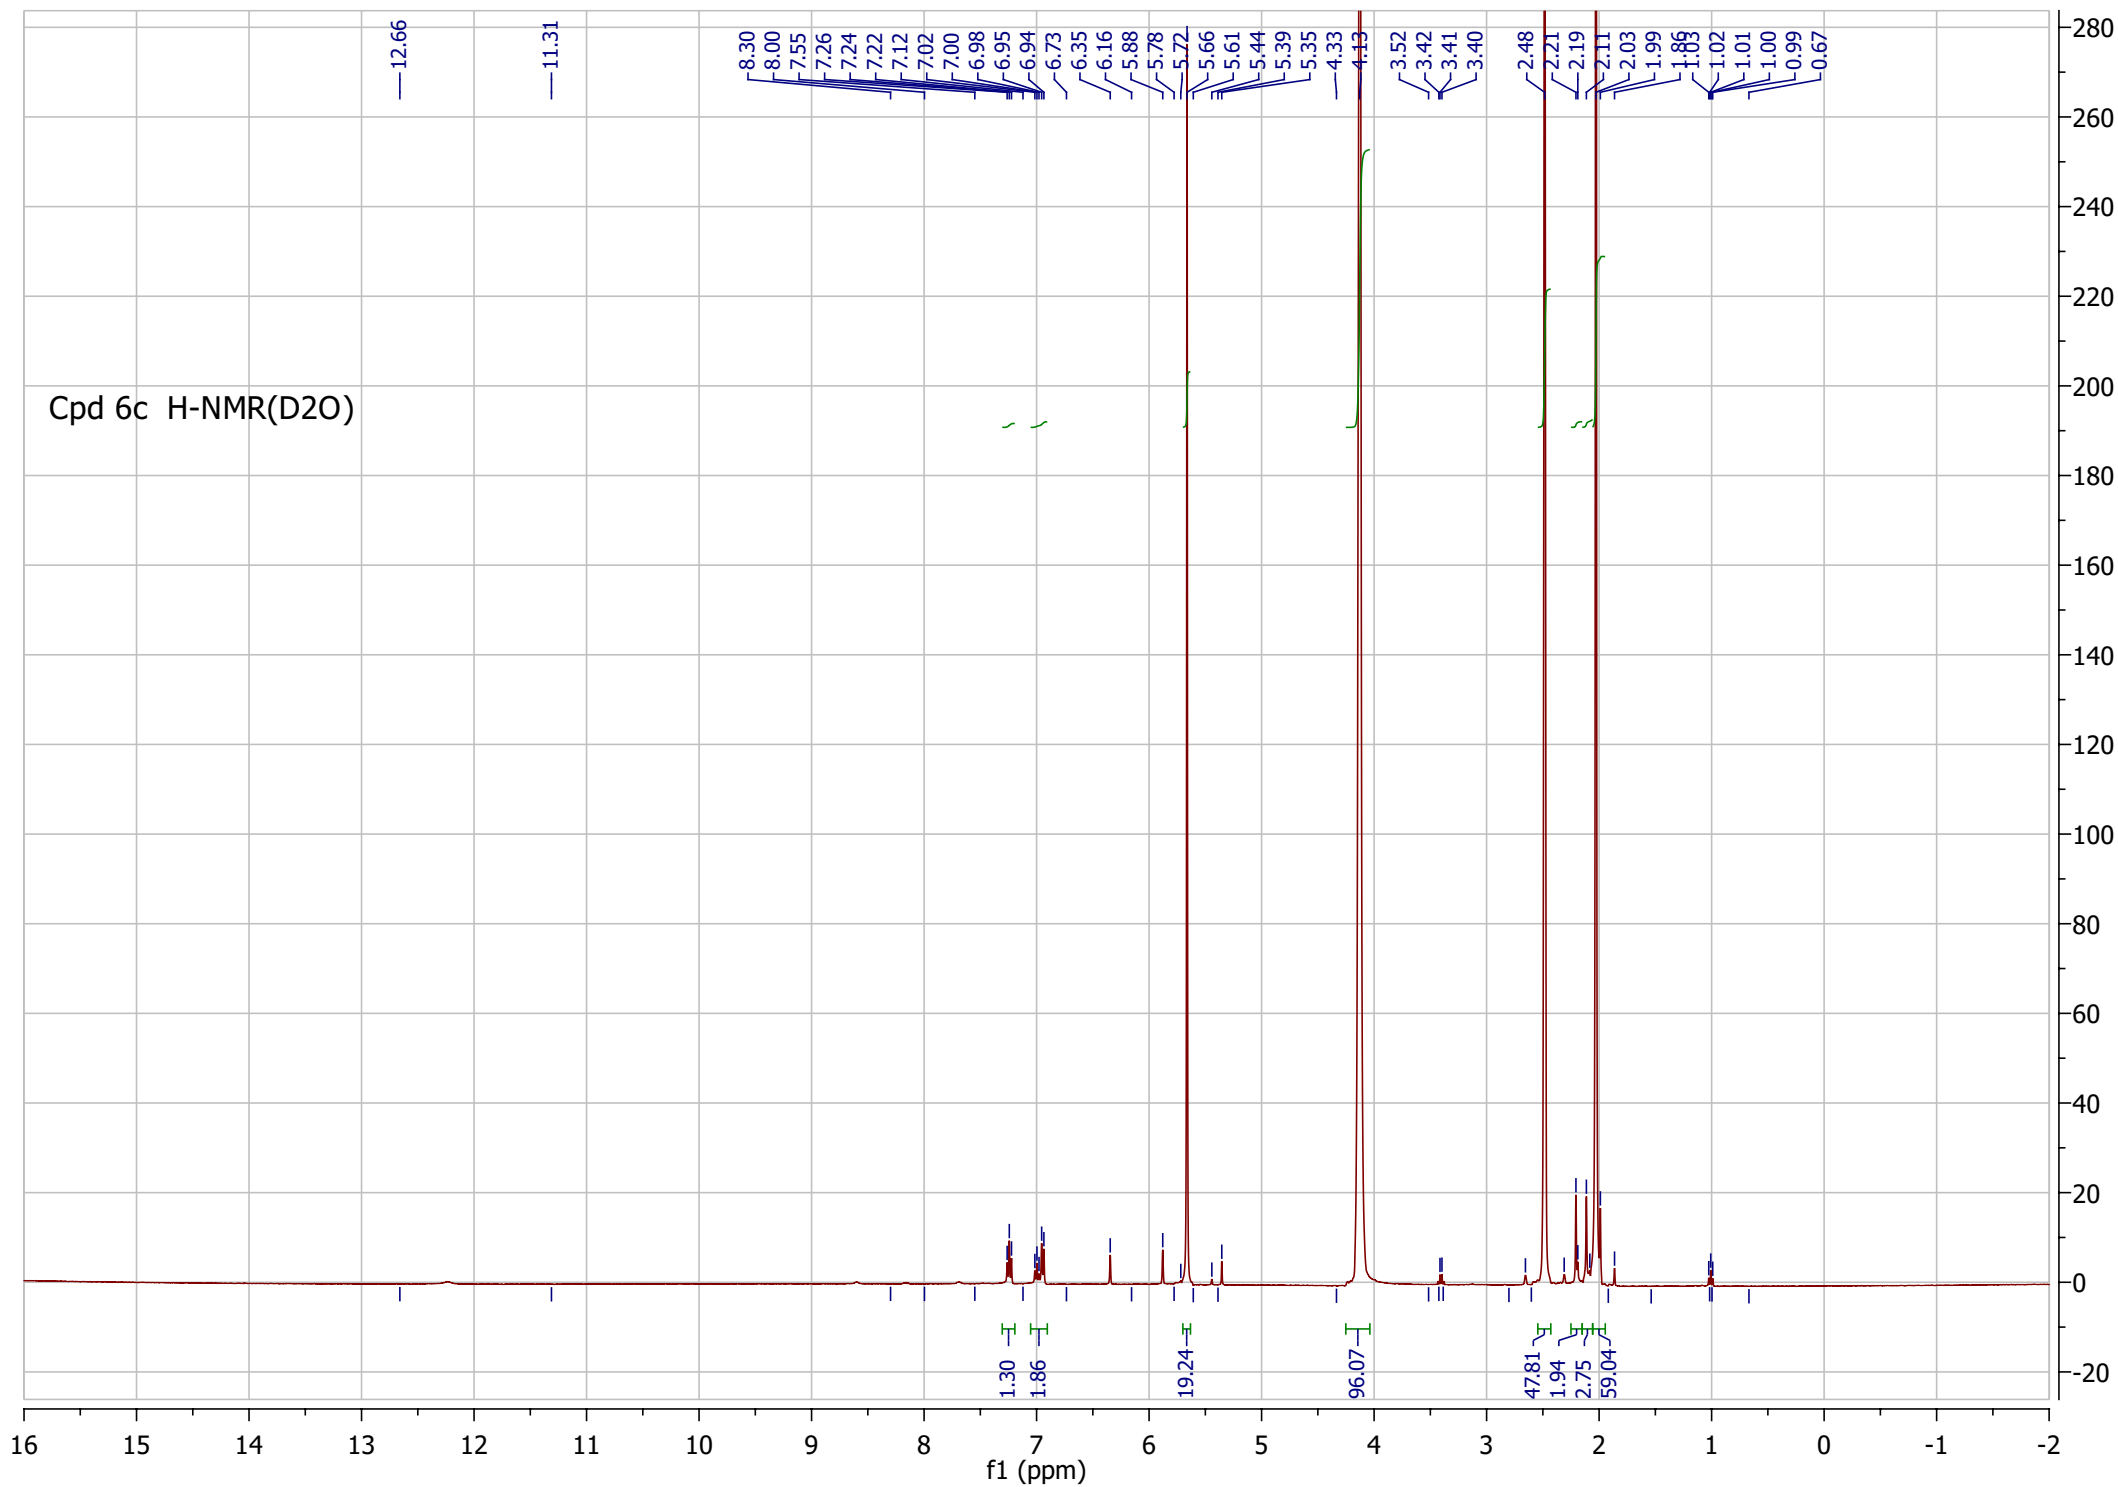

Cpd 6c C13 NMR

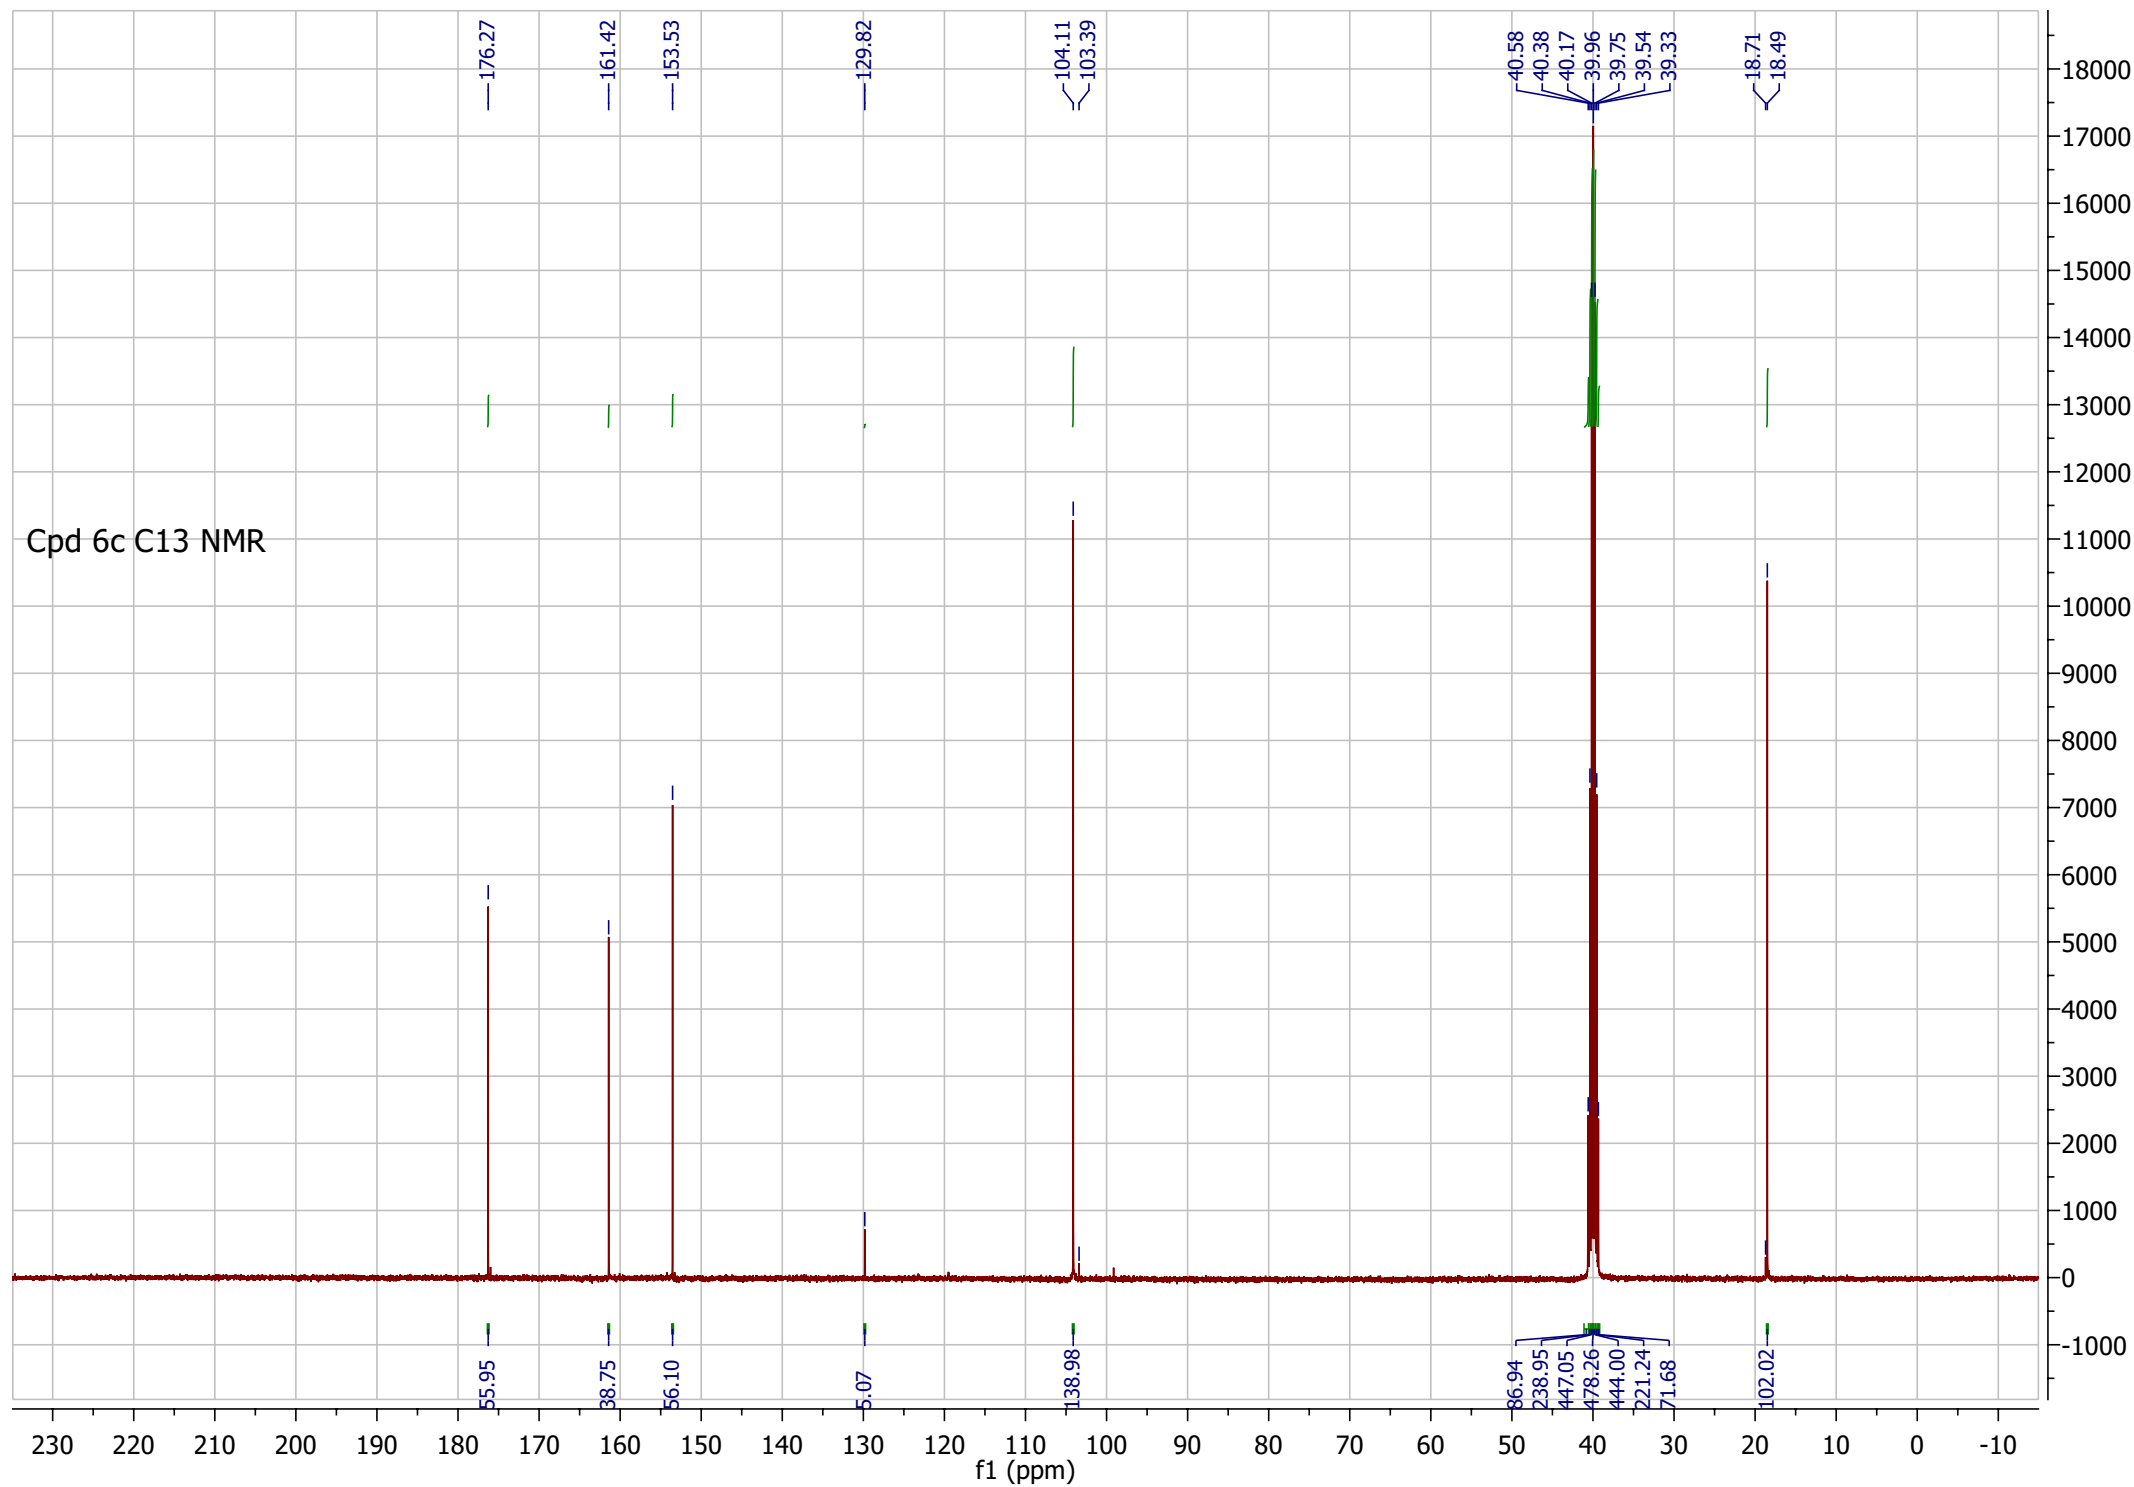

Cpd 6e

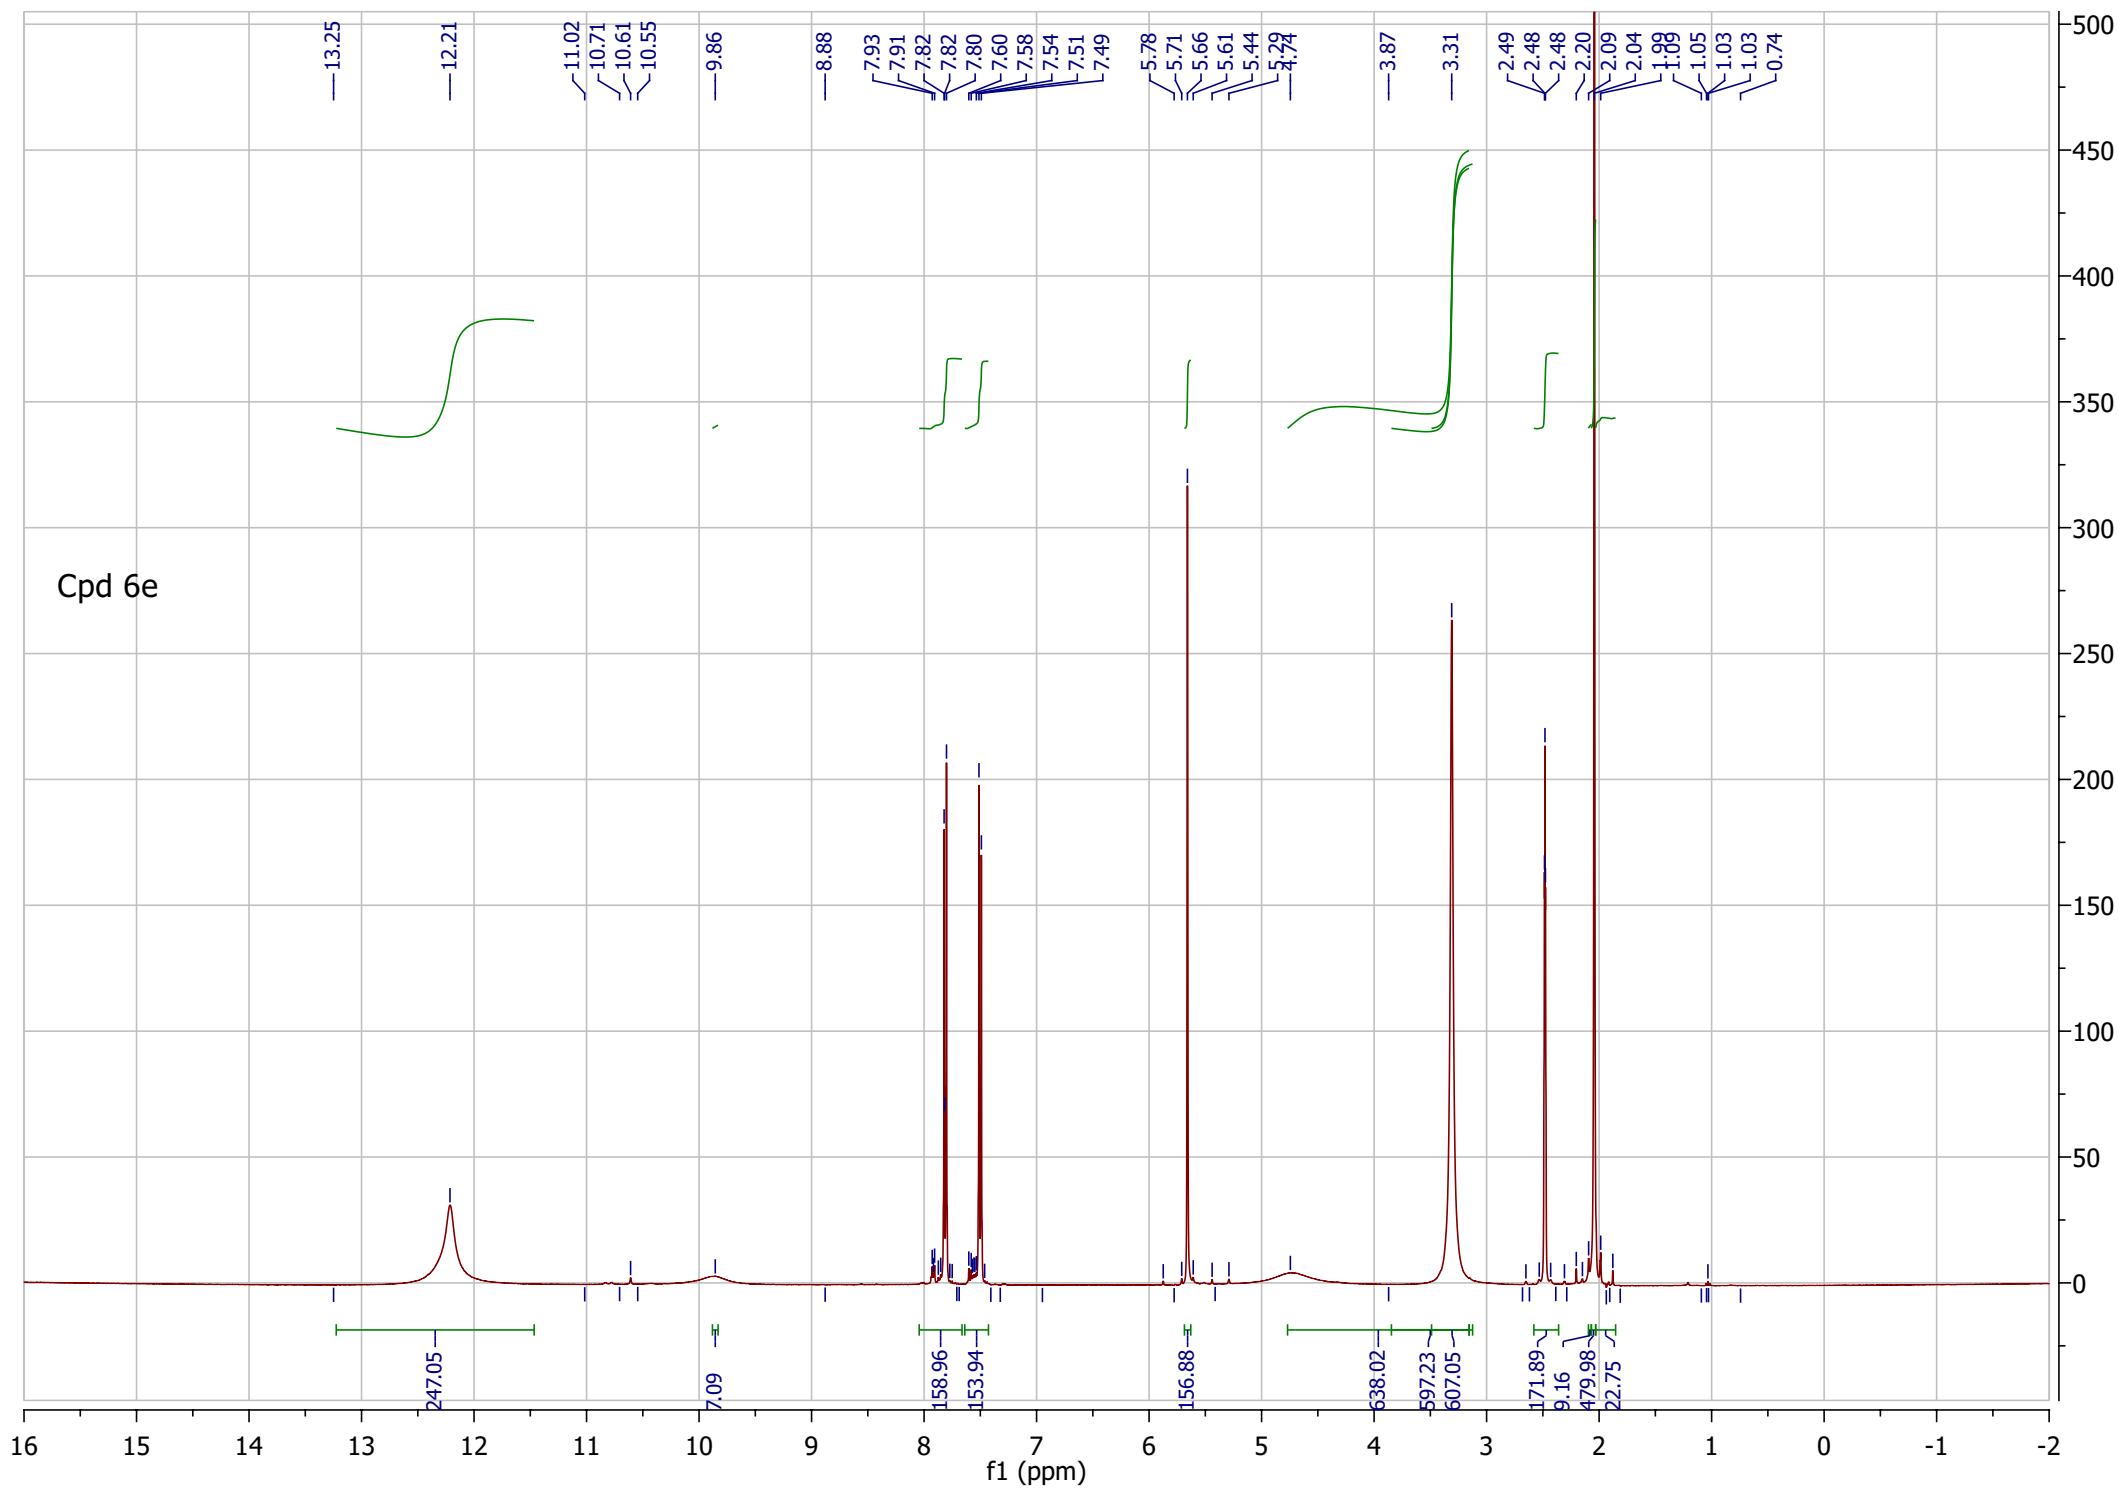

# Cpd 7a C13-NMR

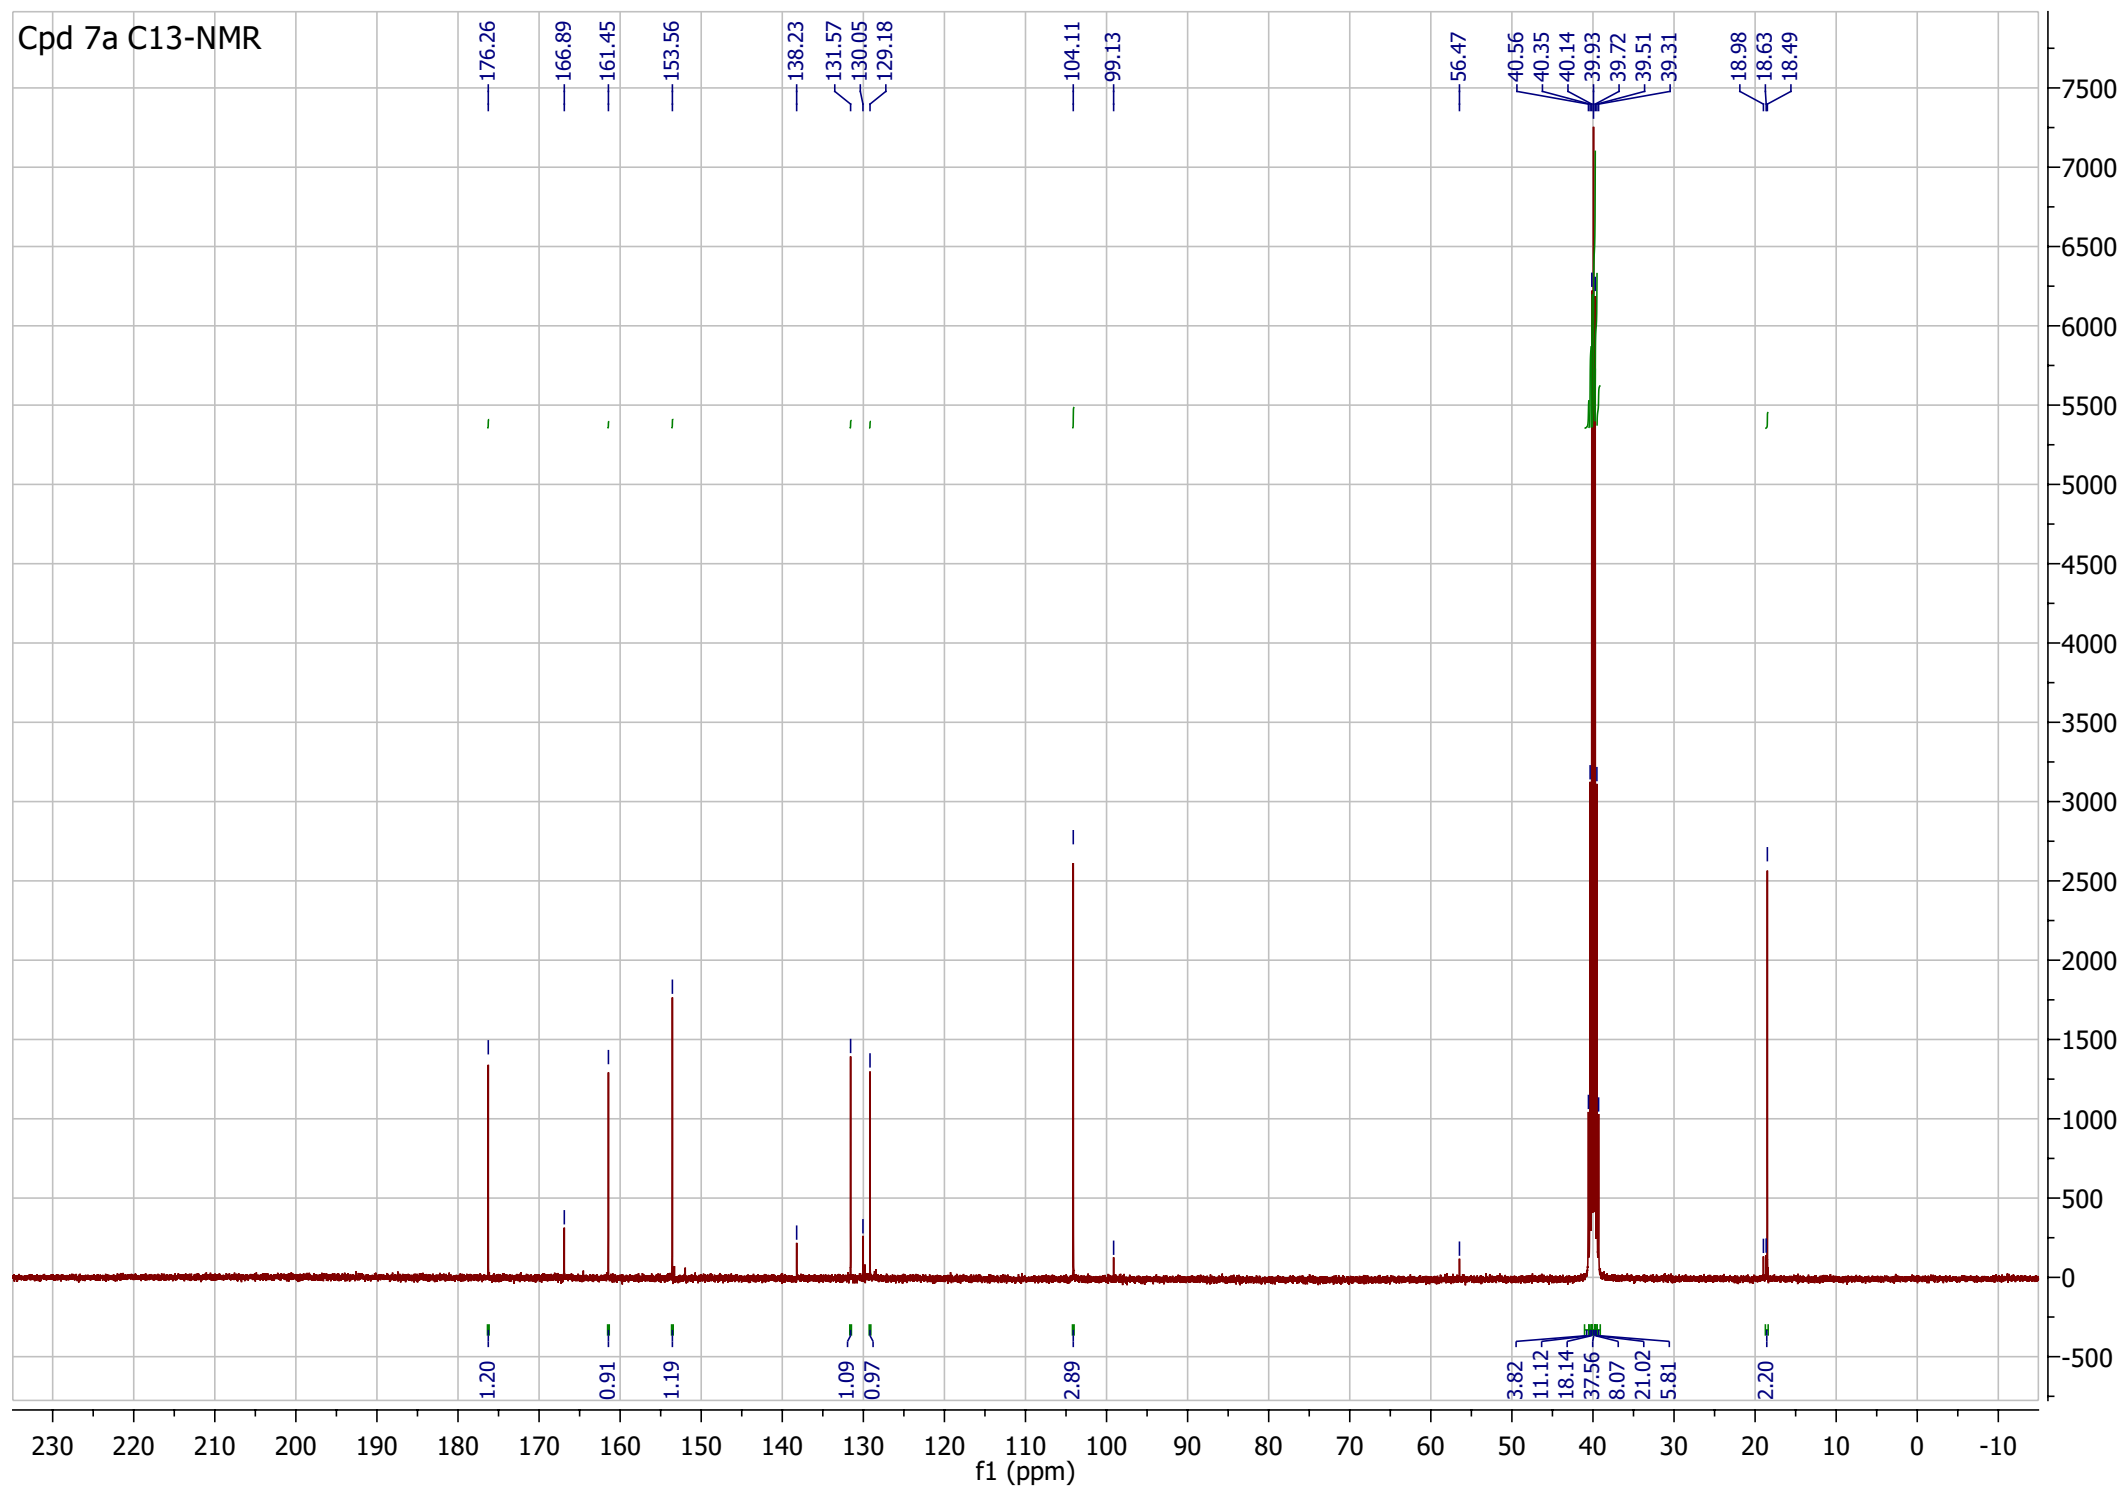

Cpd 7a H-NMR

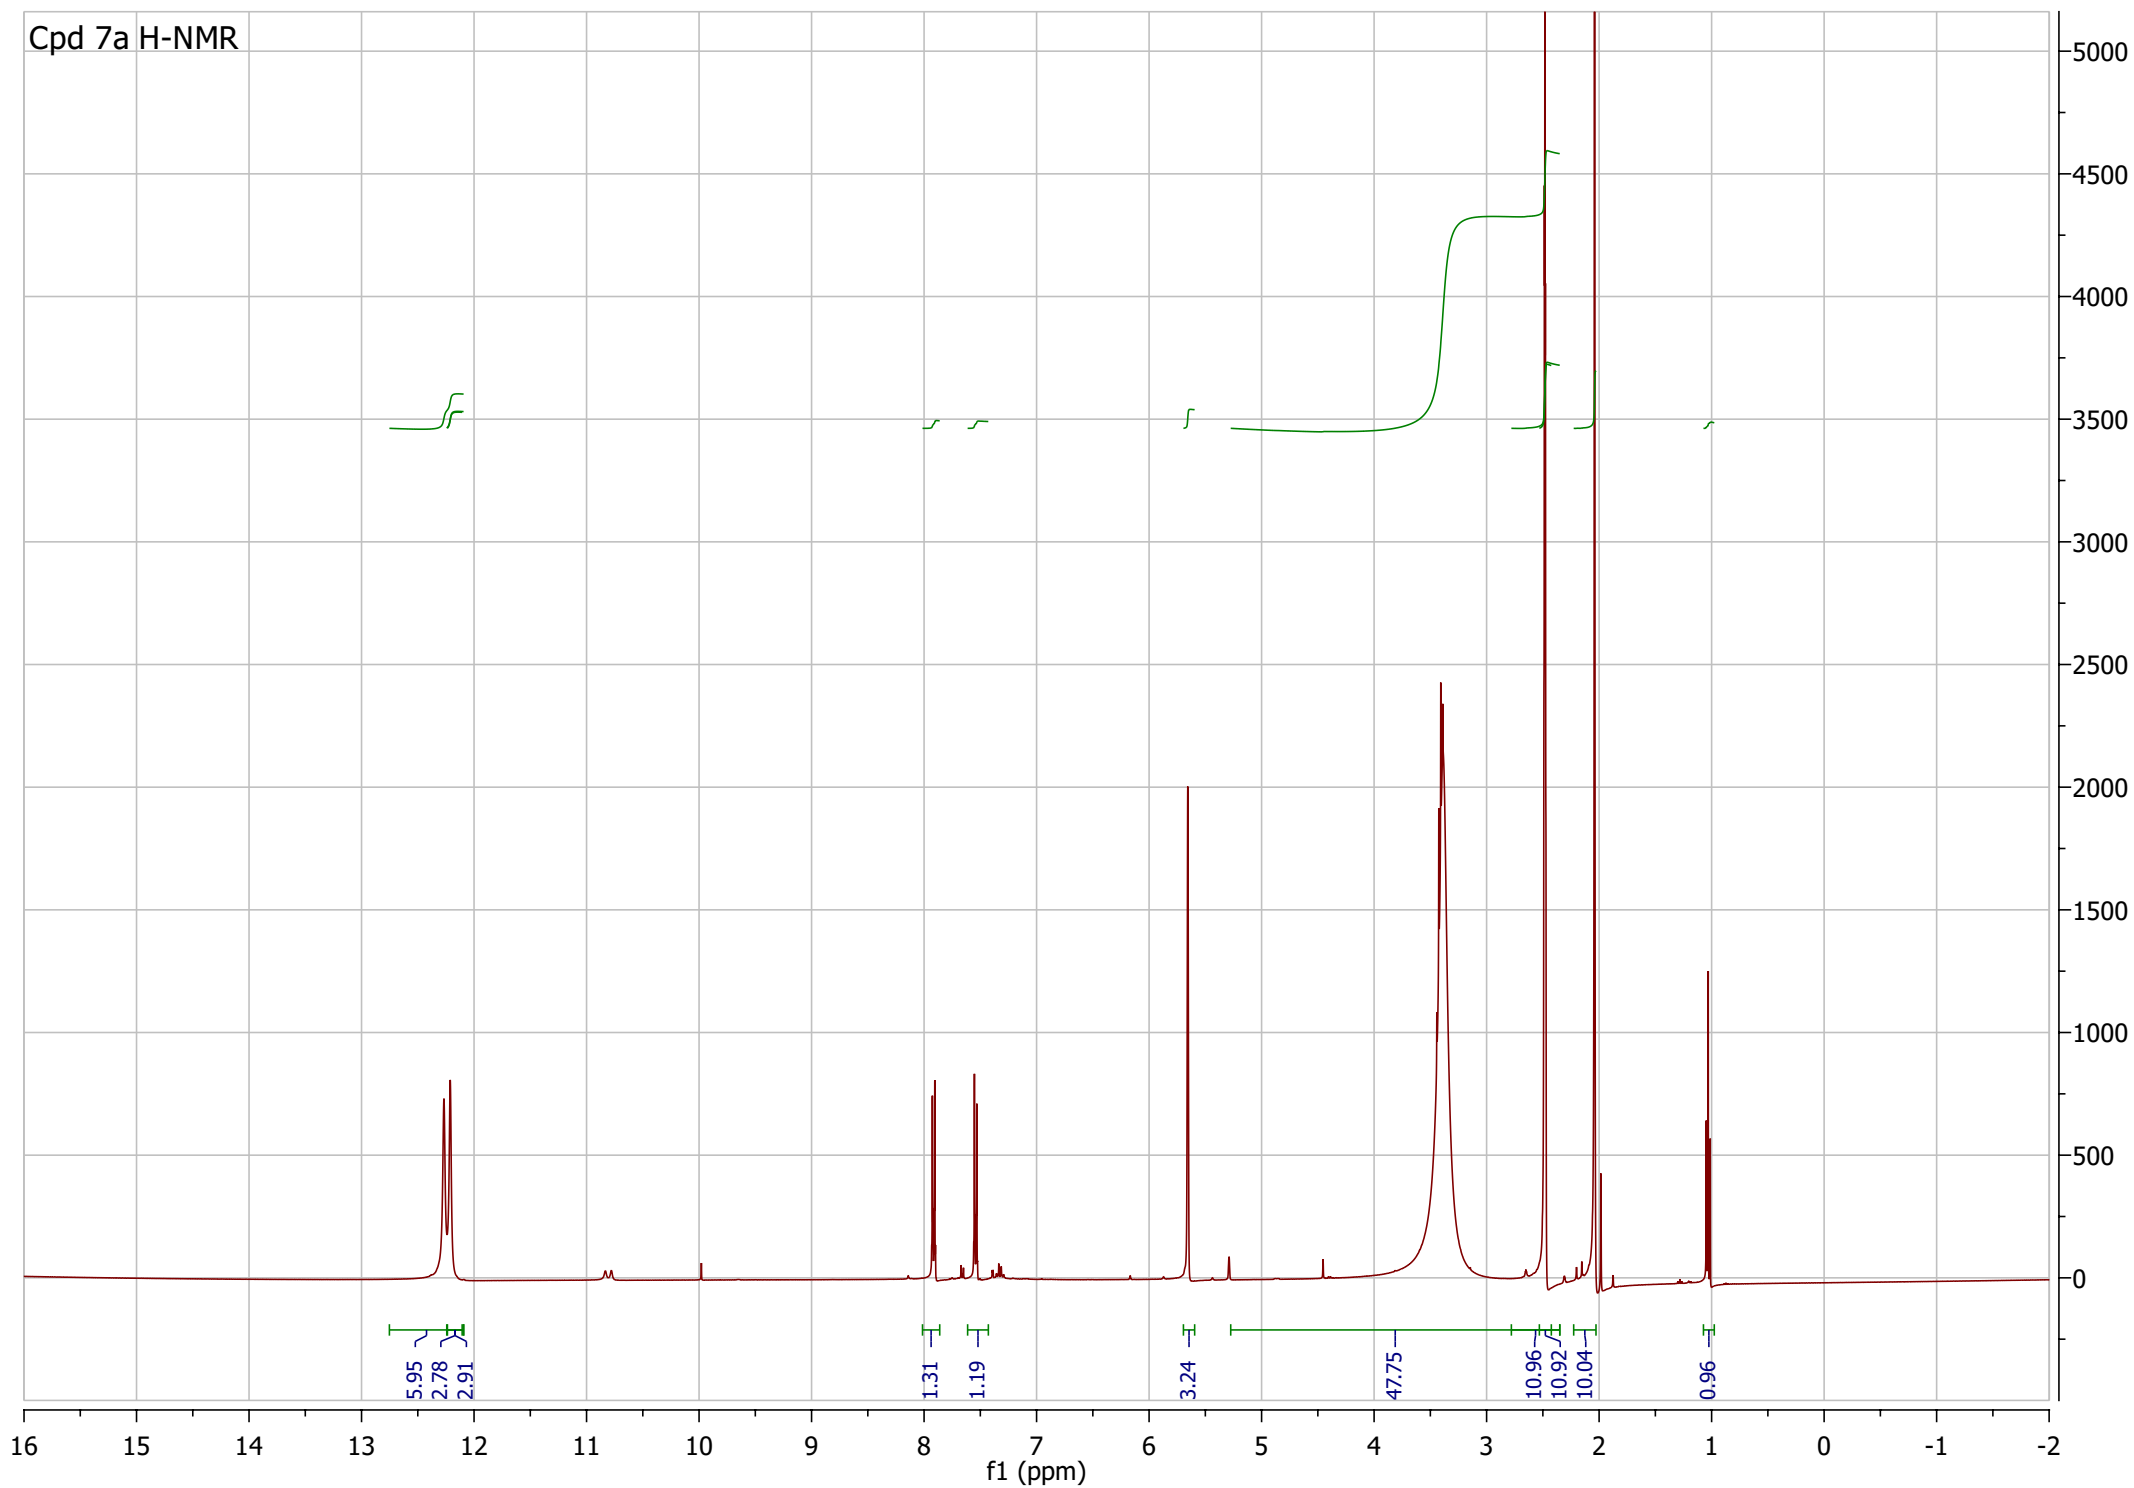



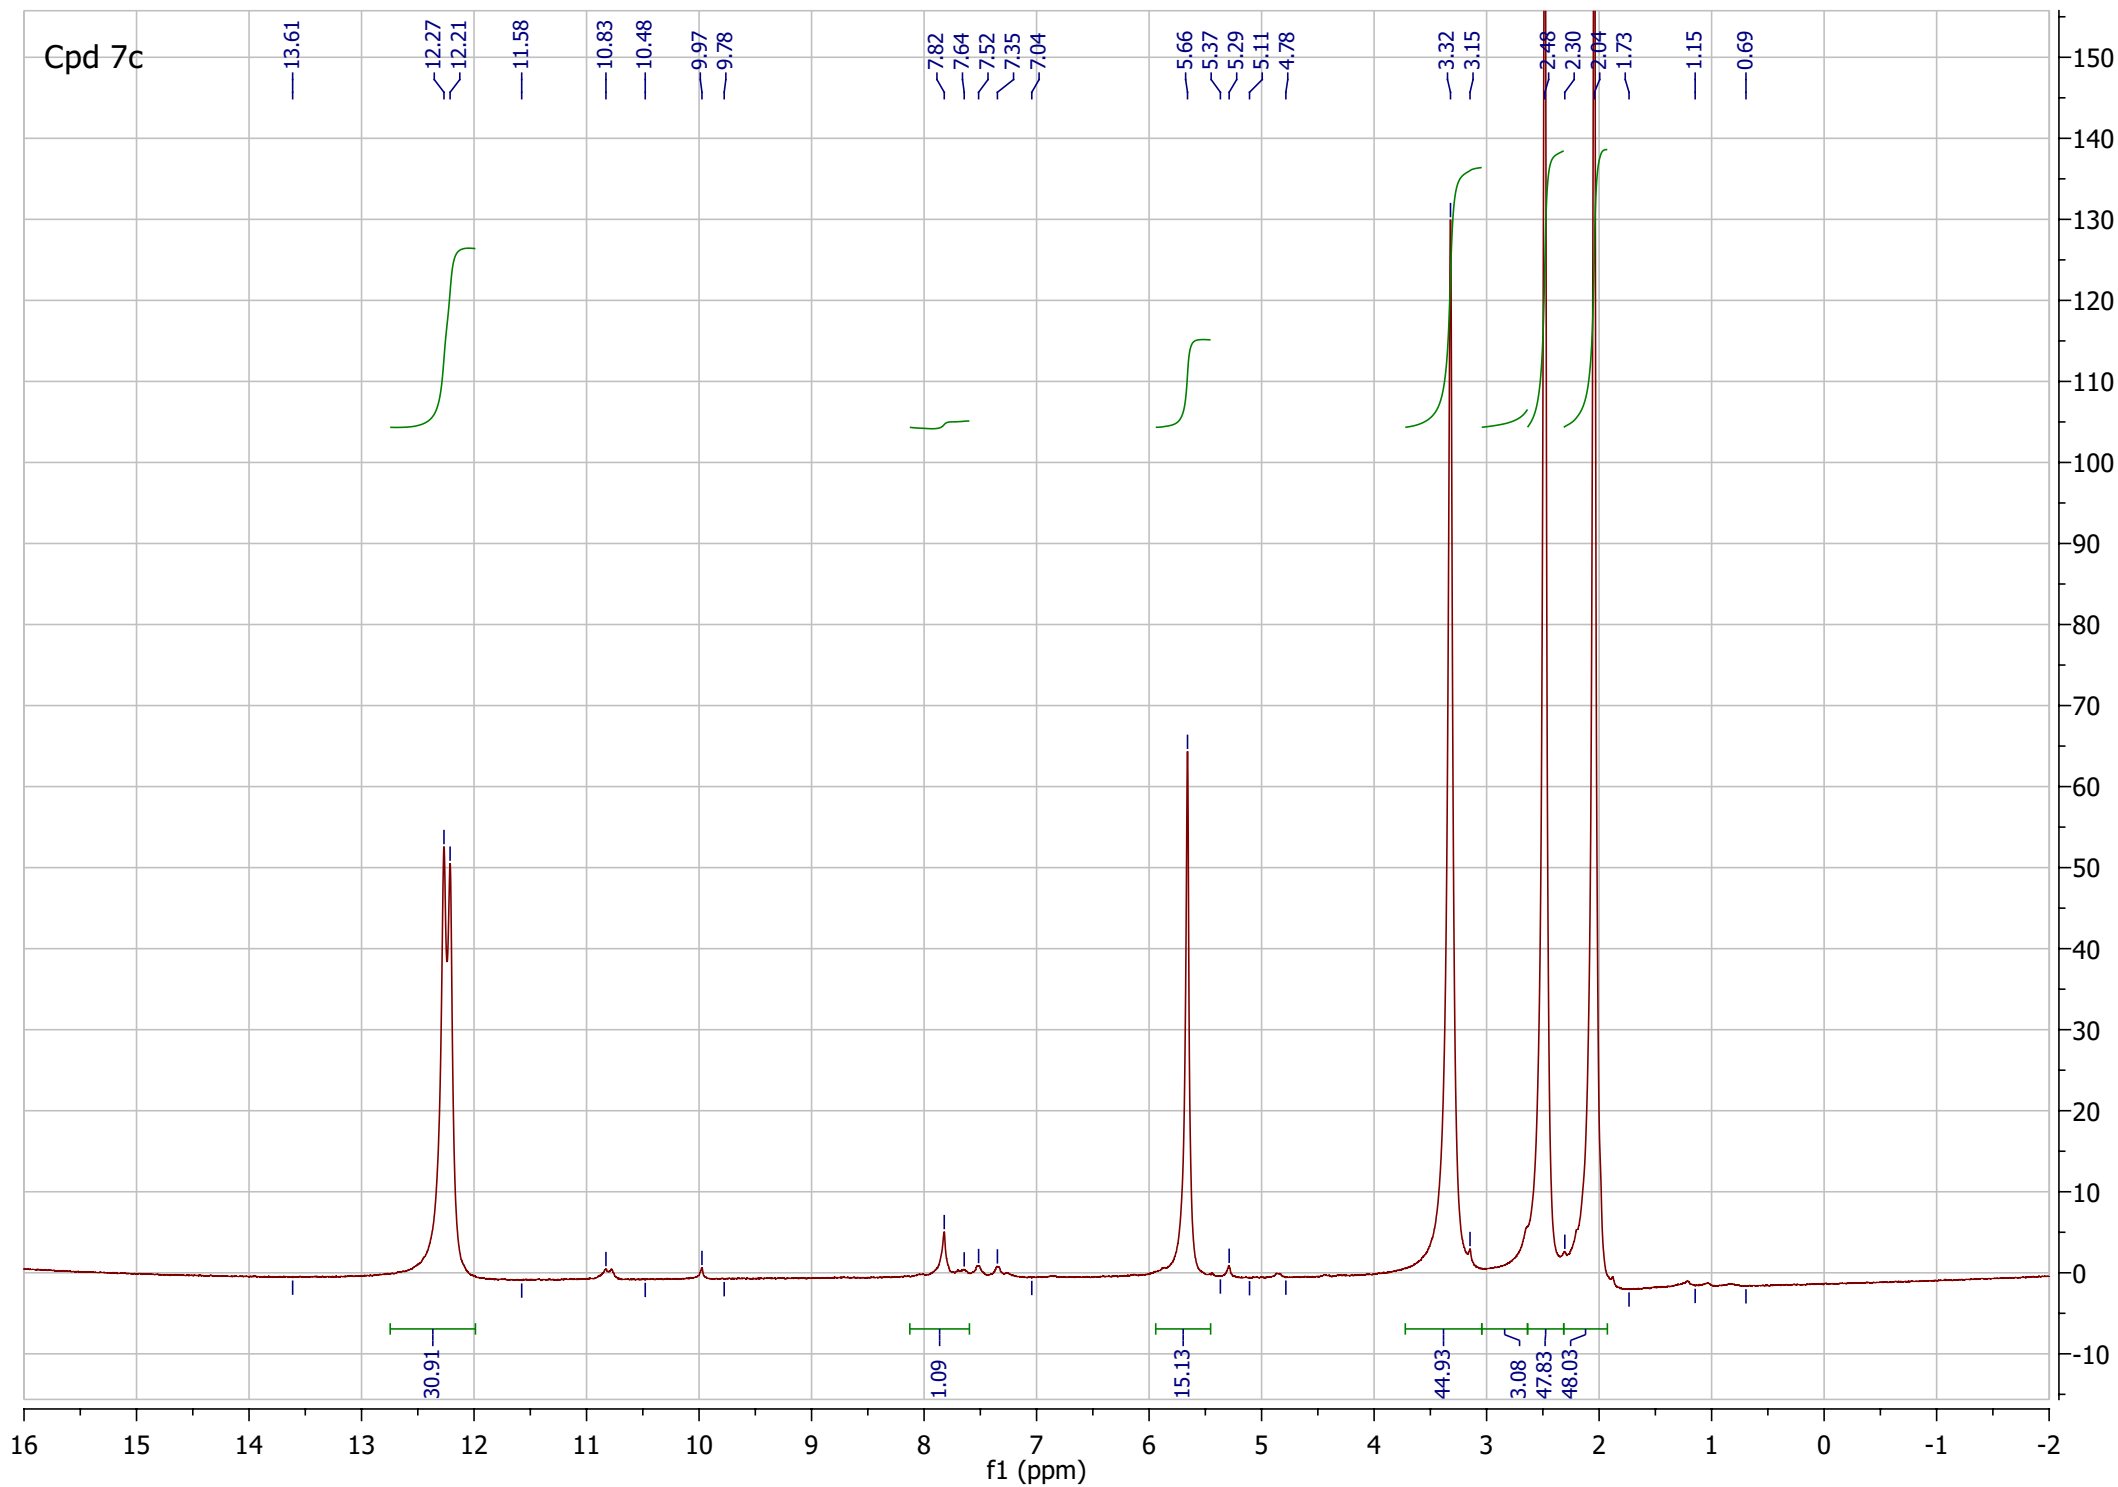

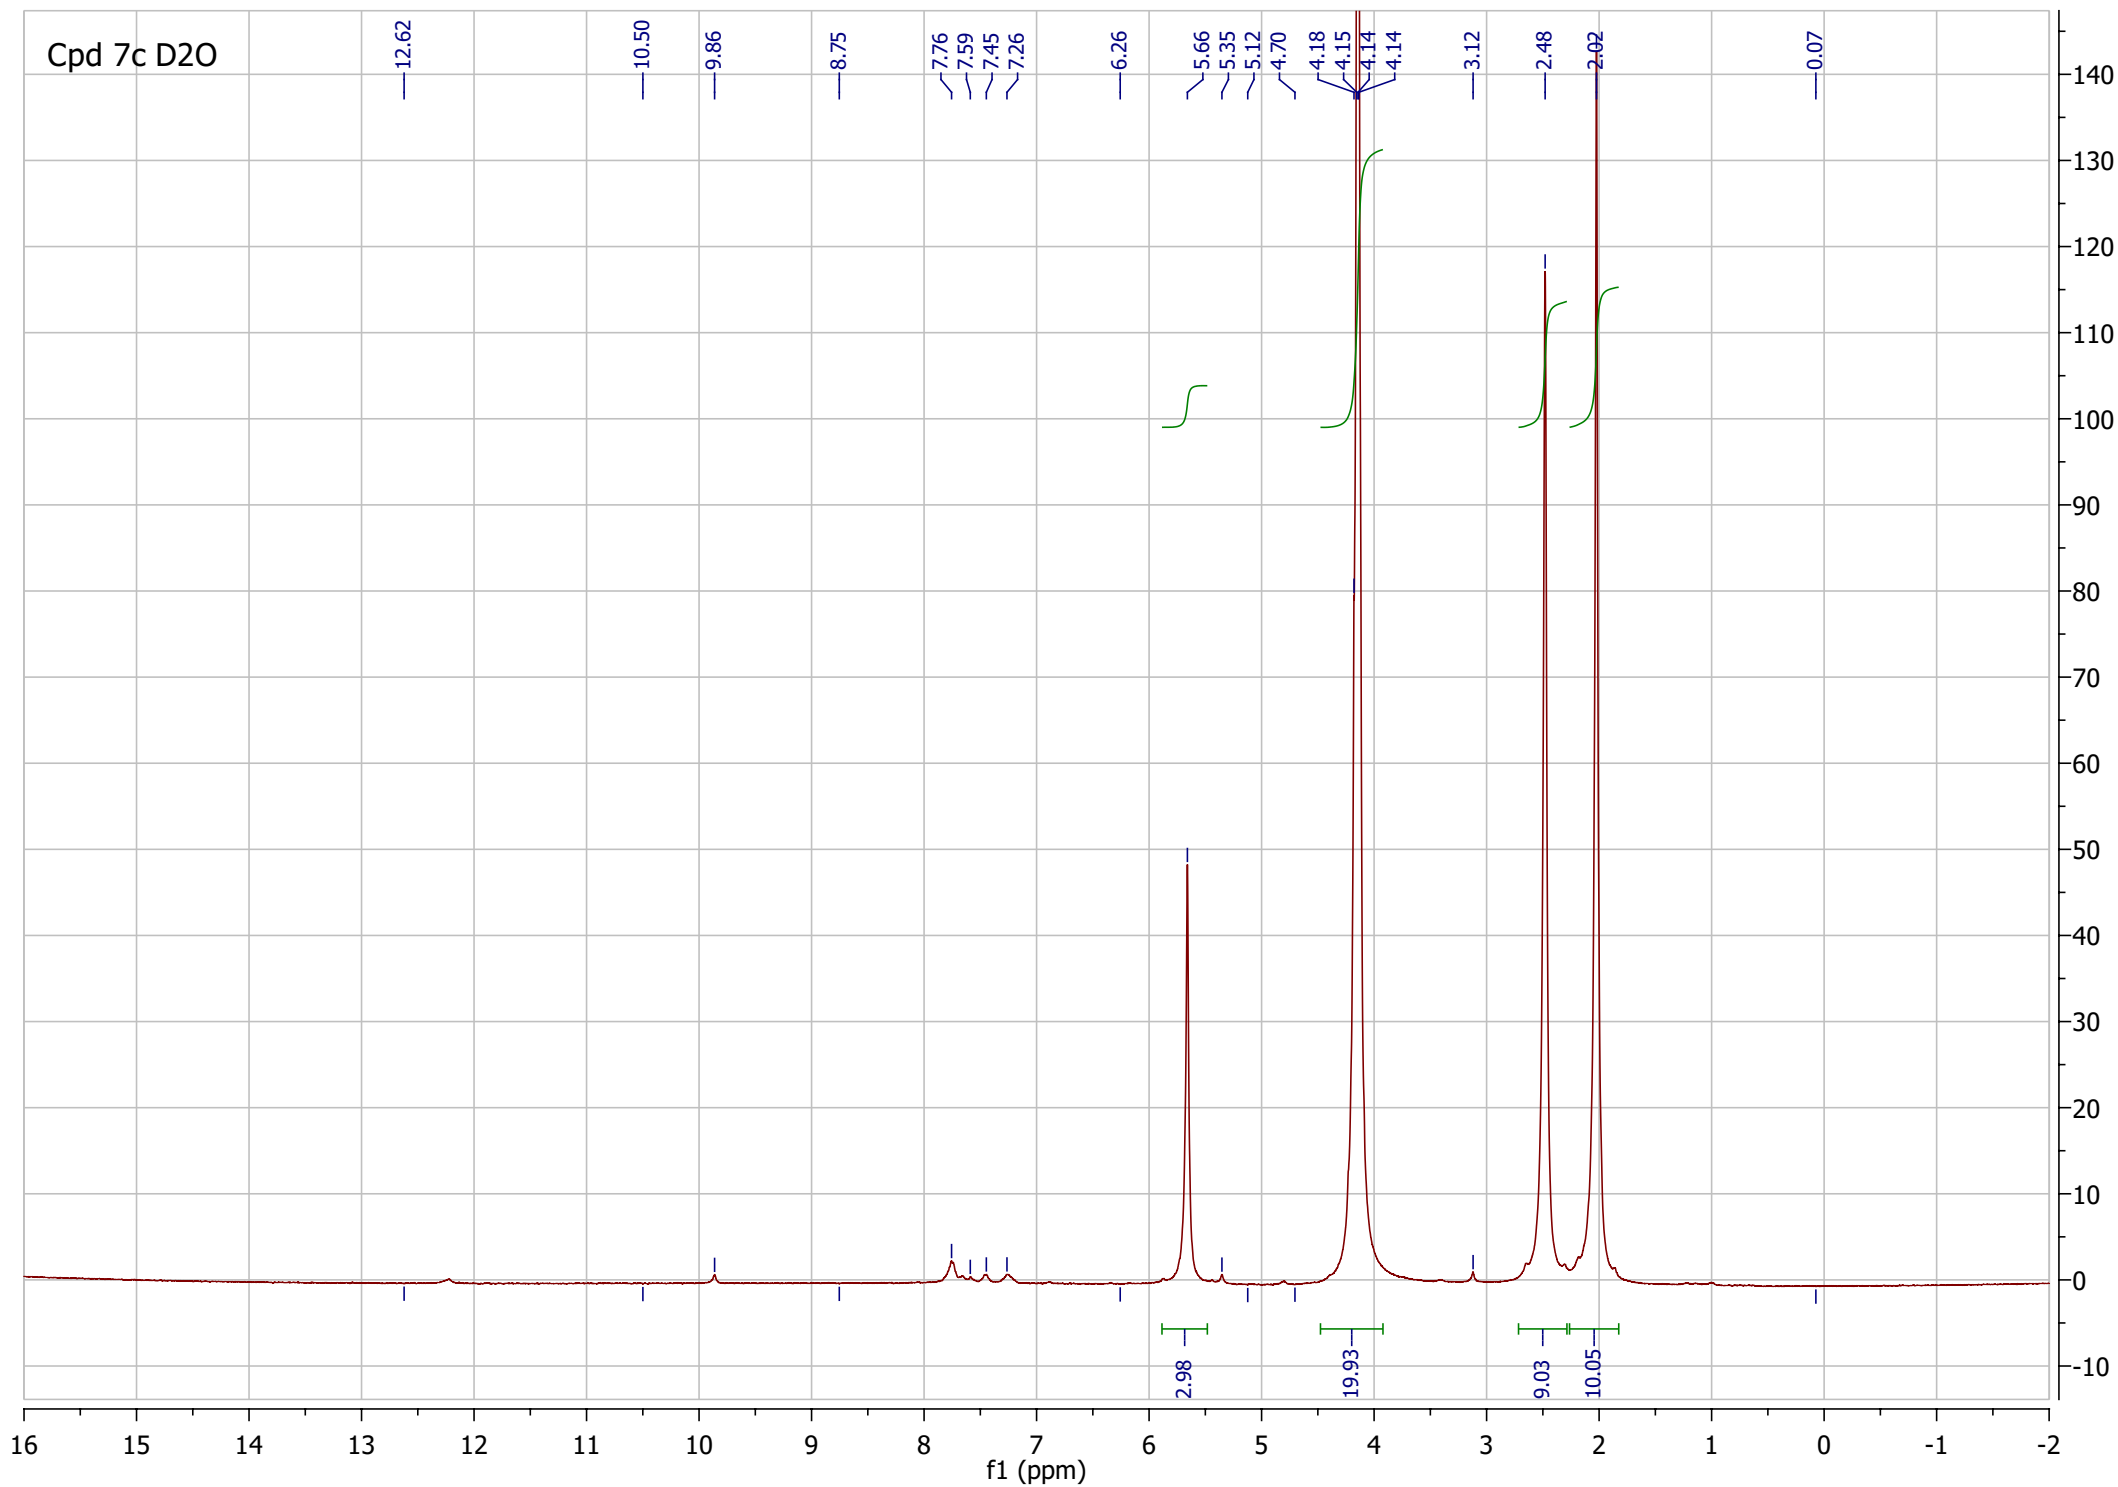

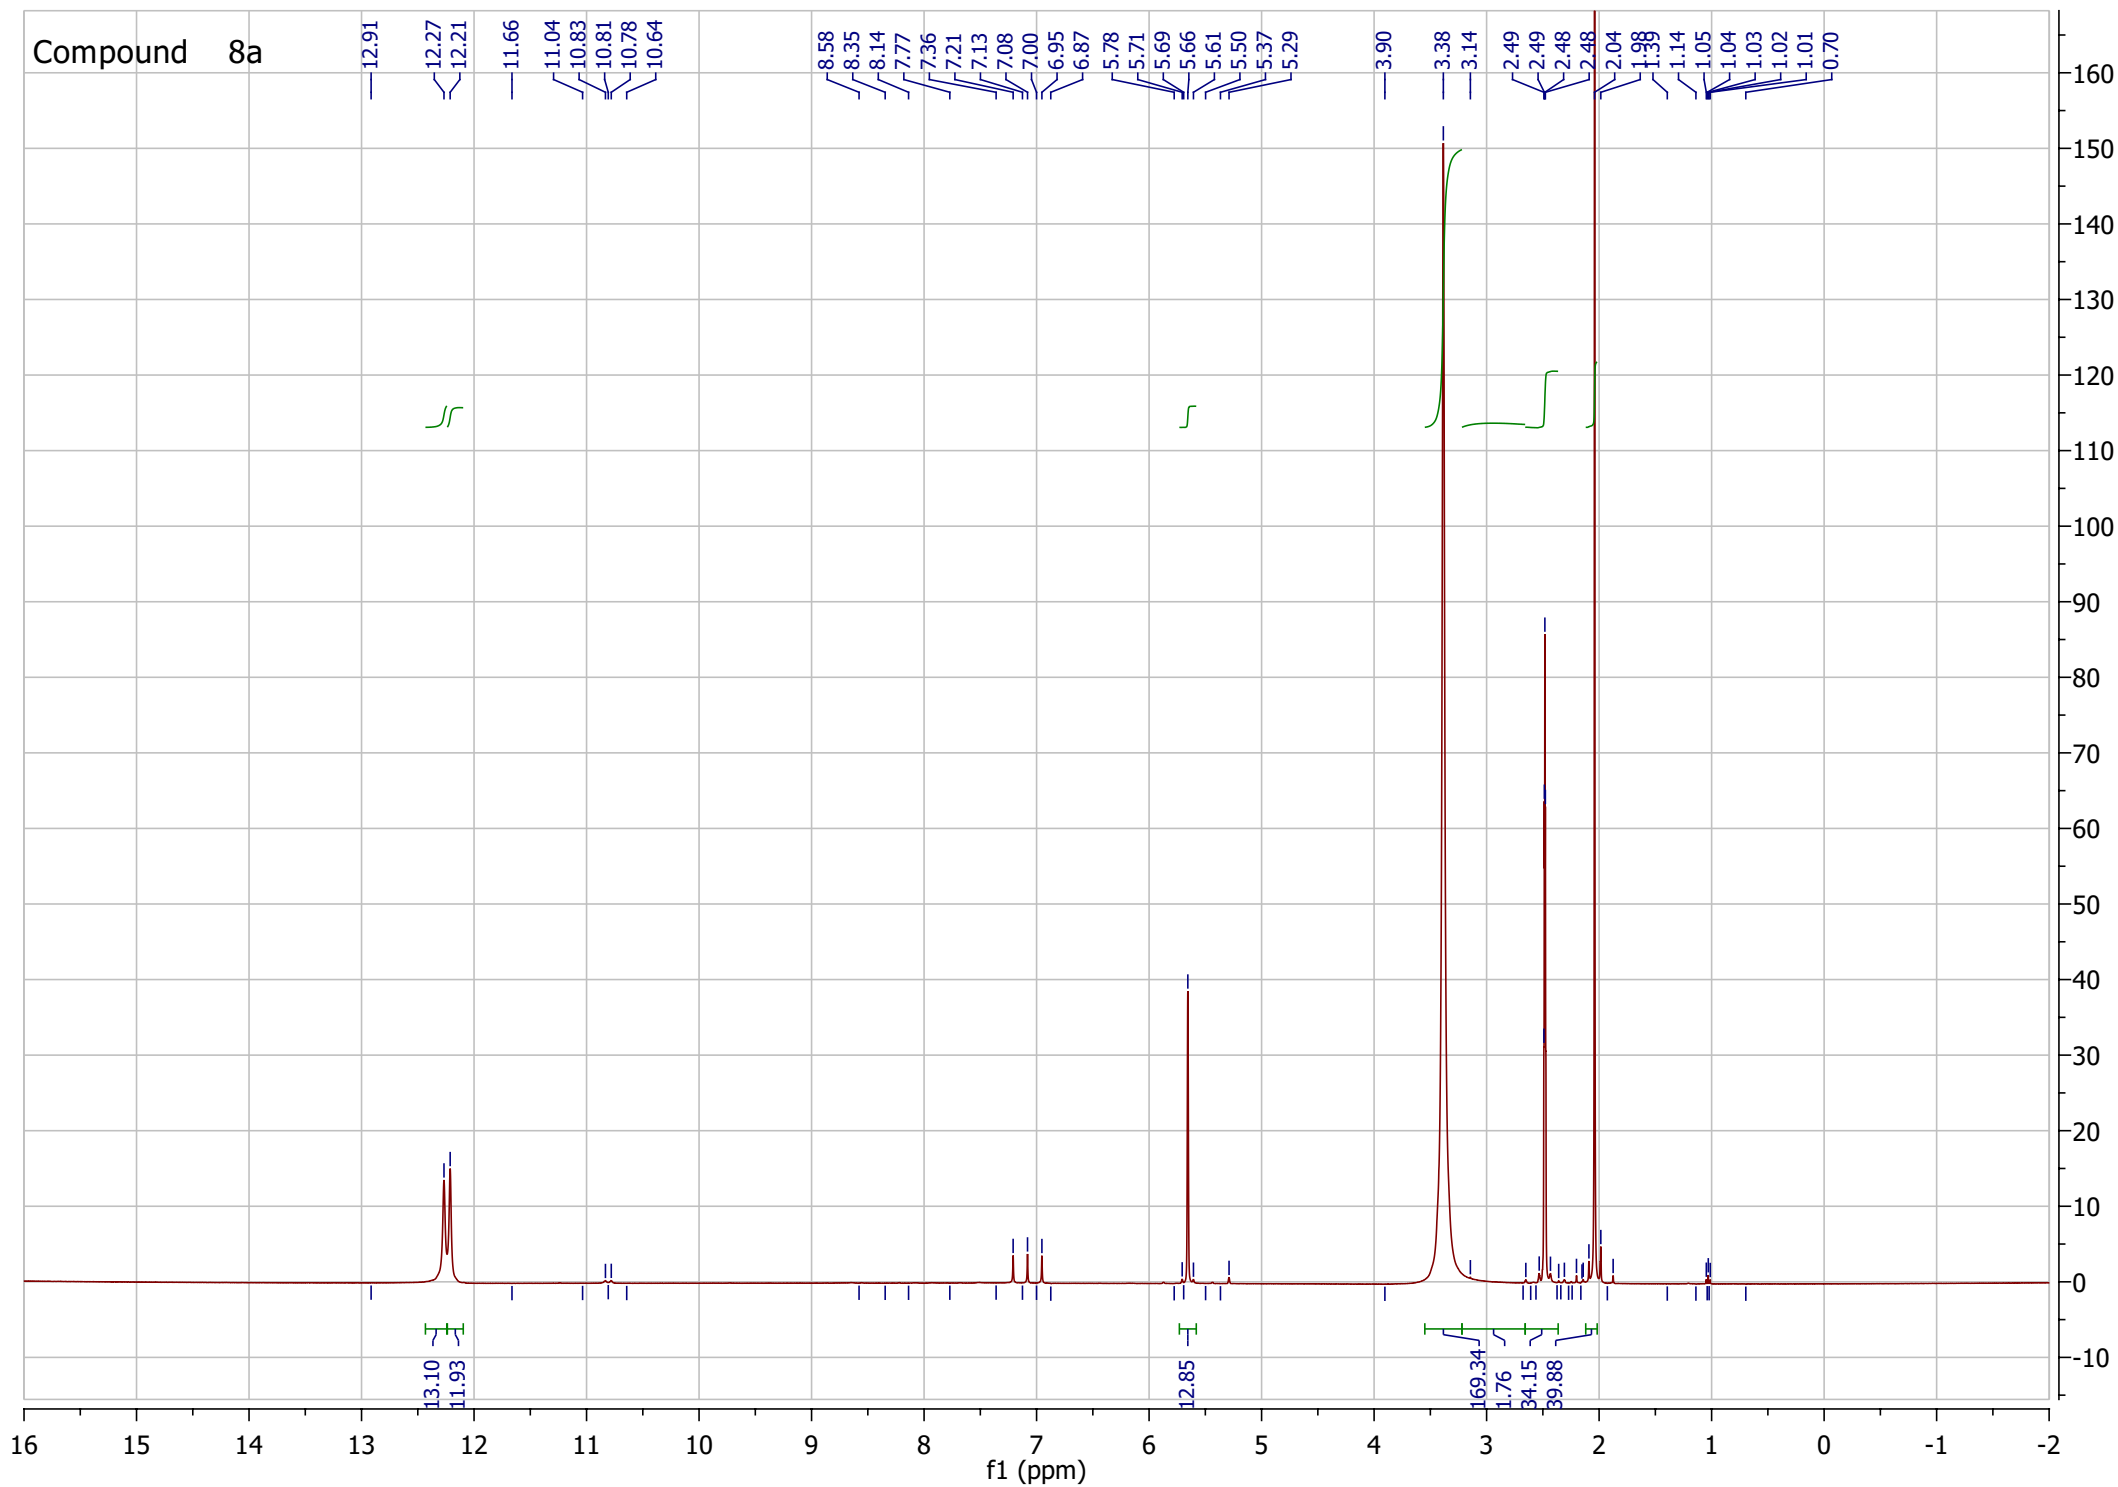

# Cpd 8a H-NMR (D2O)

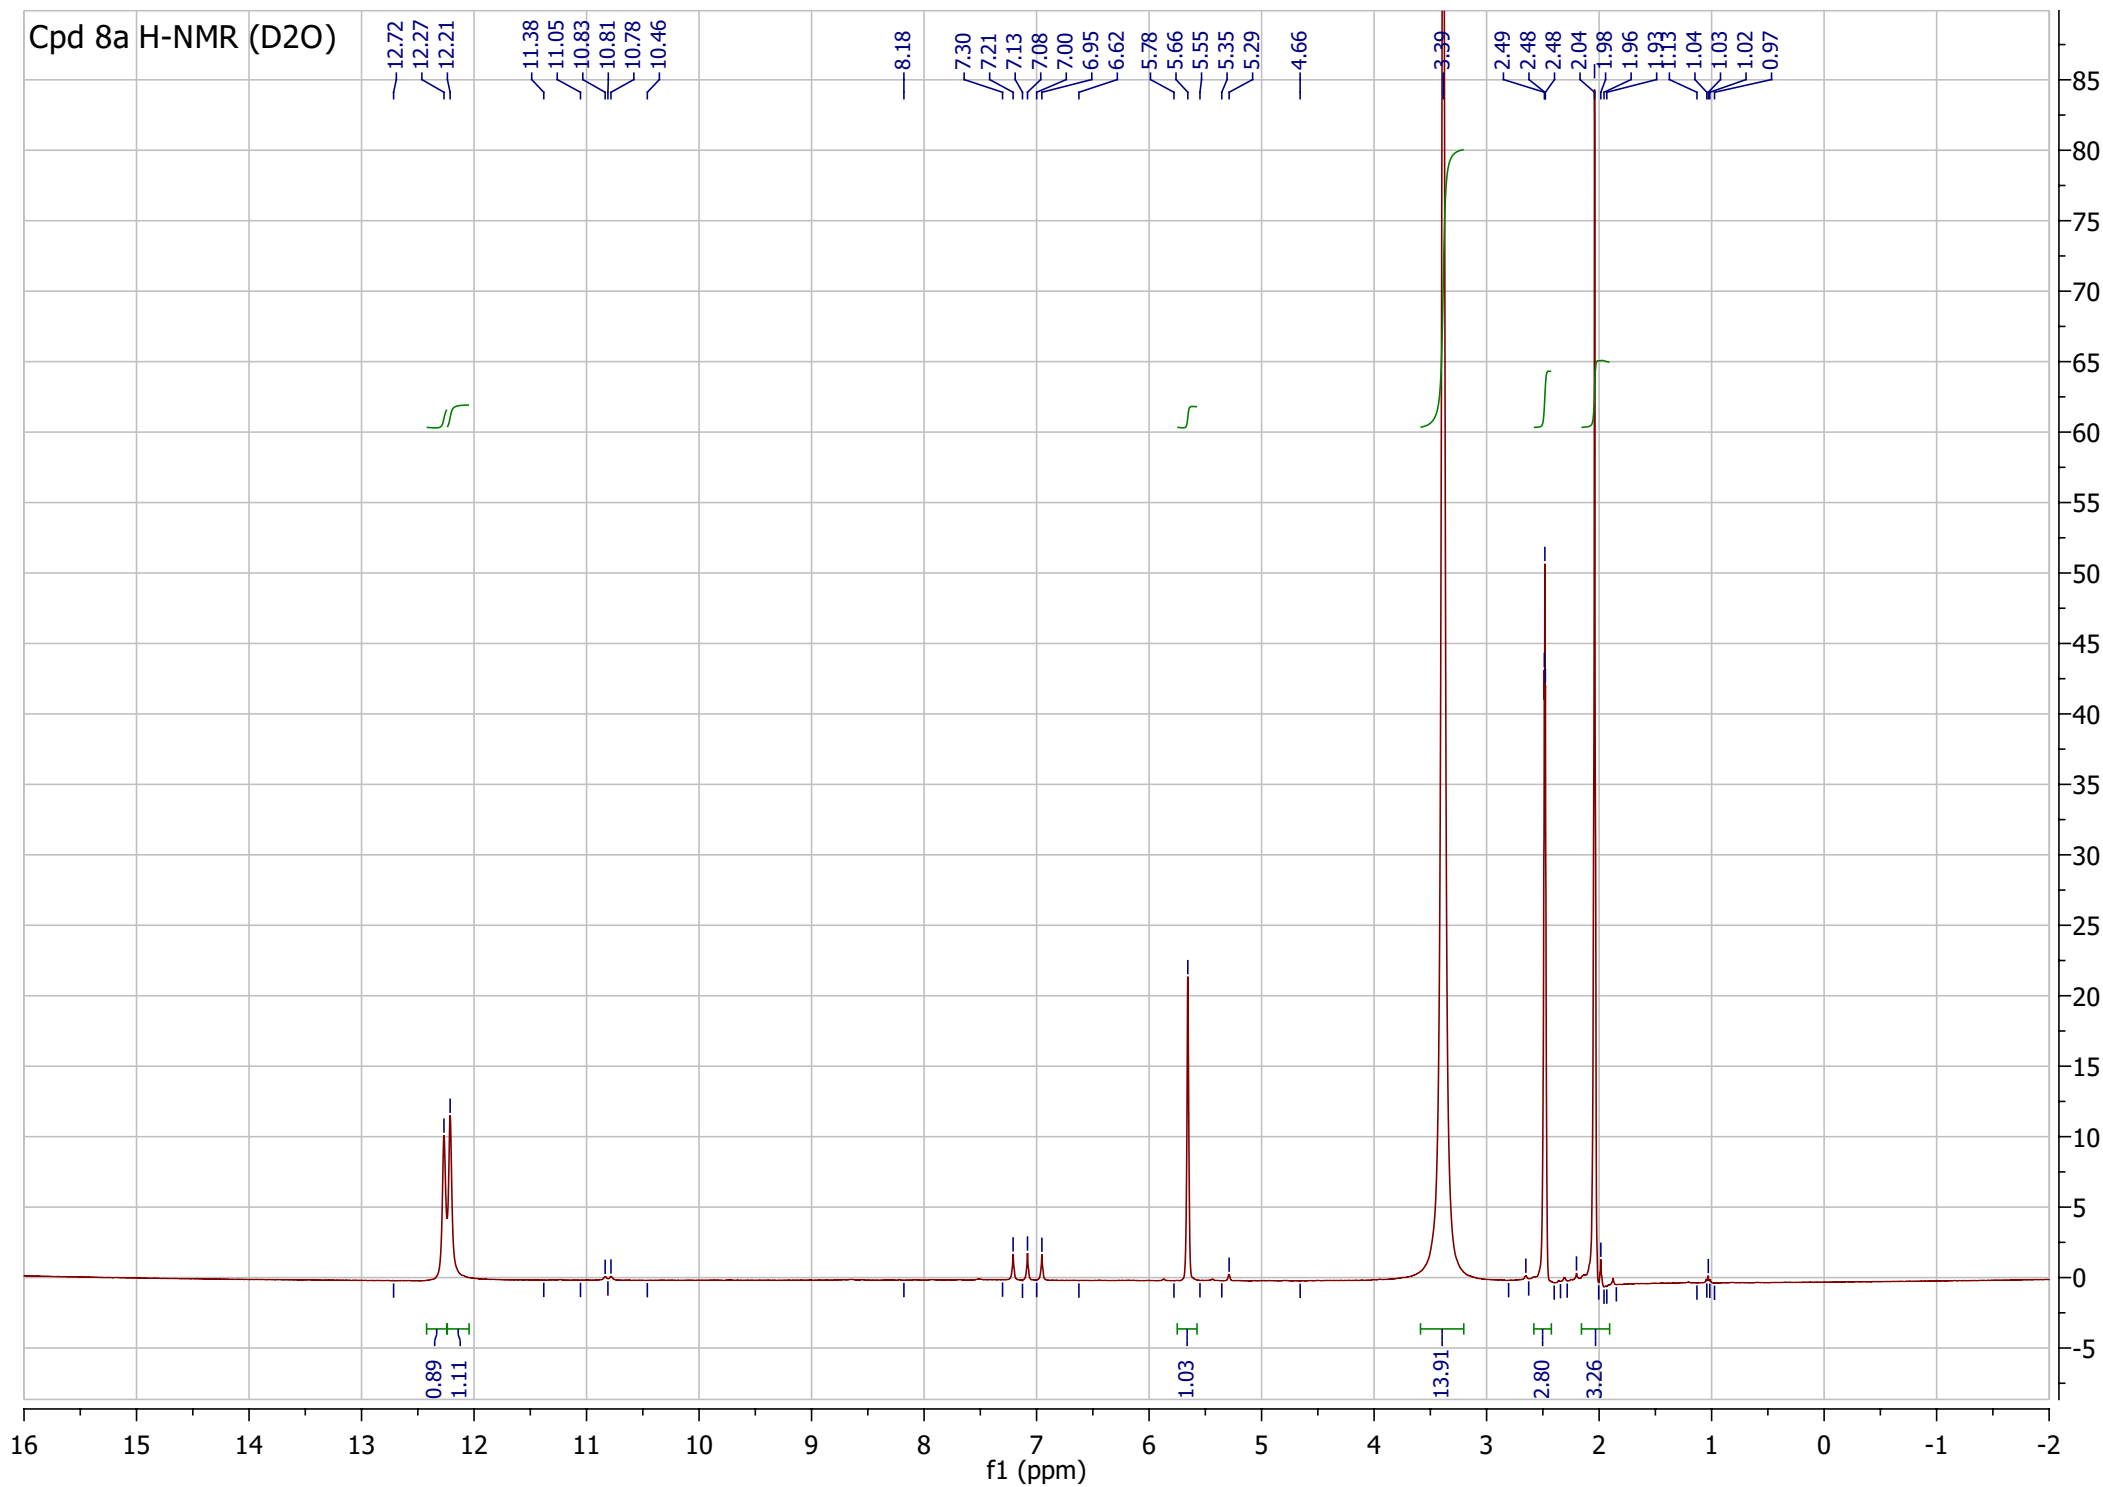

8a C<sup>13</sup>NMR

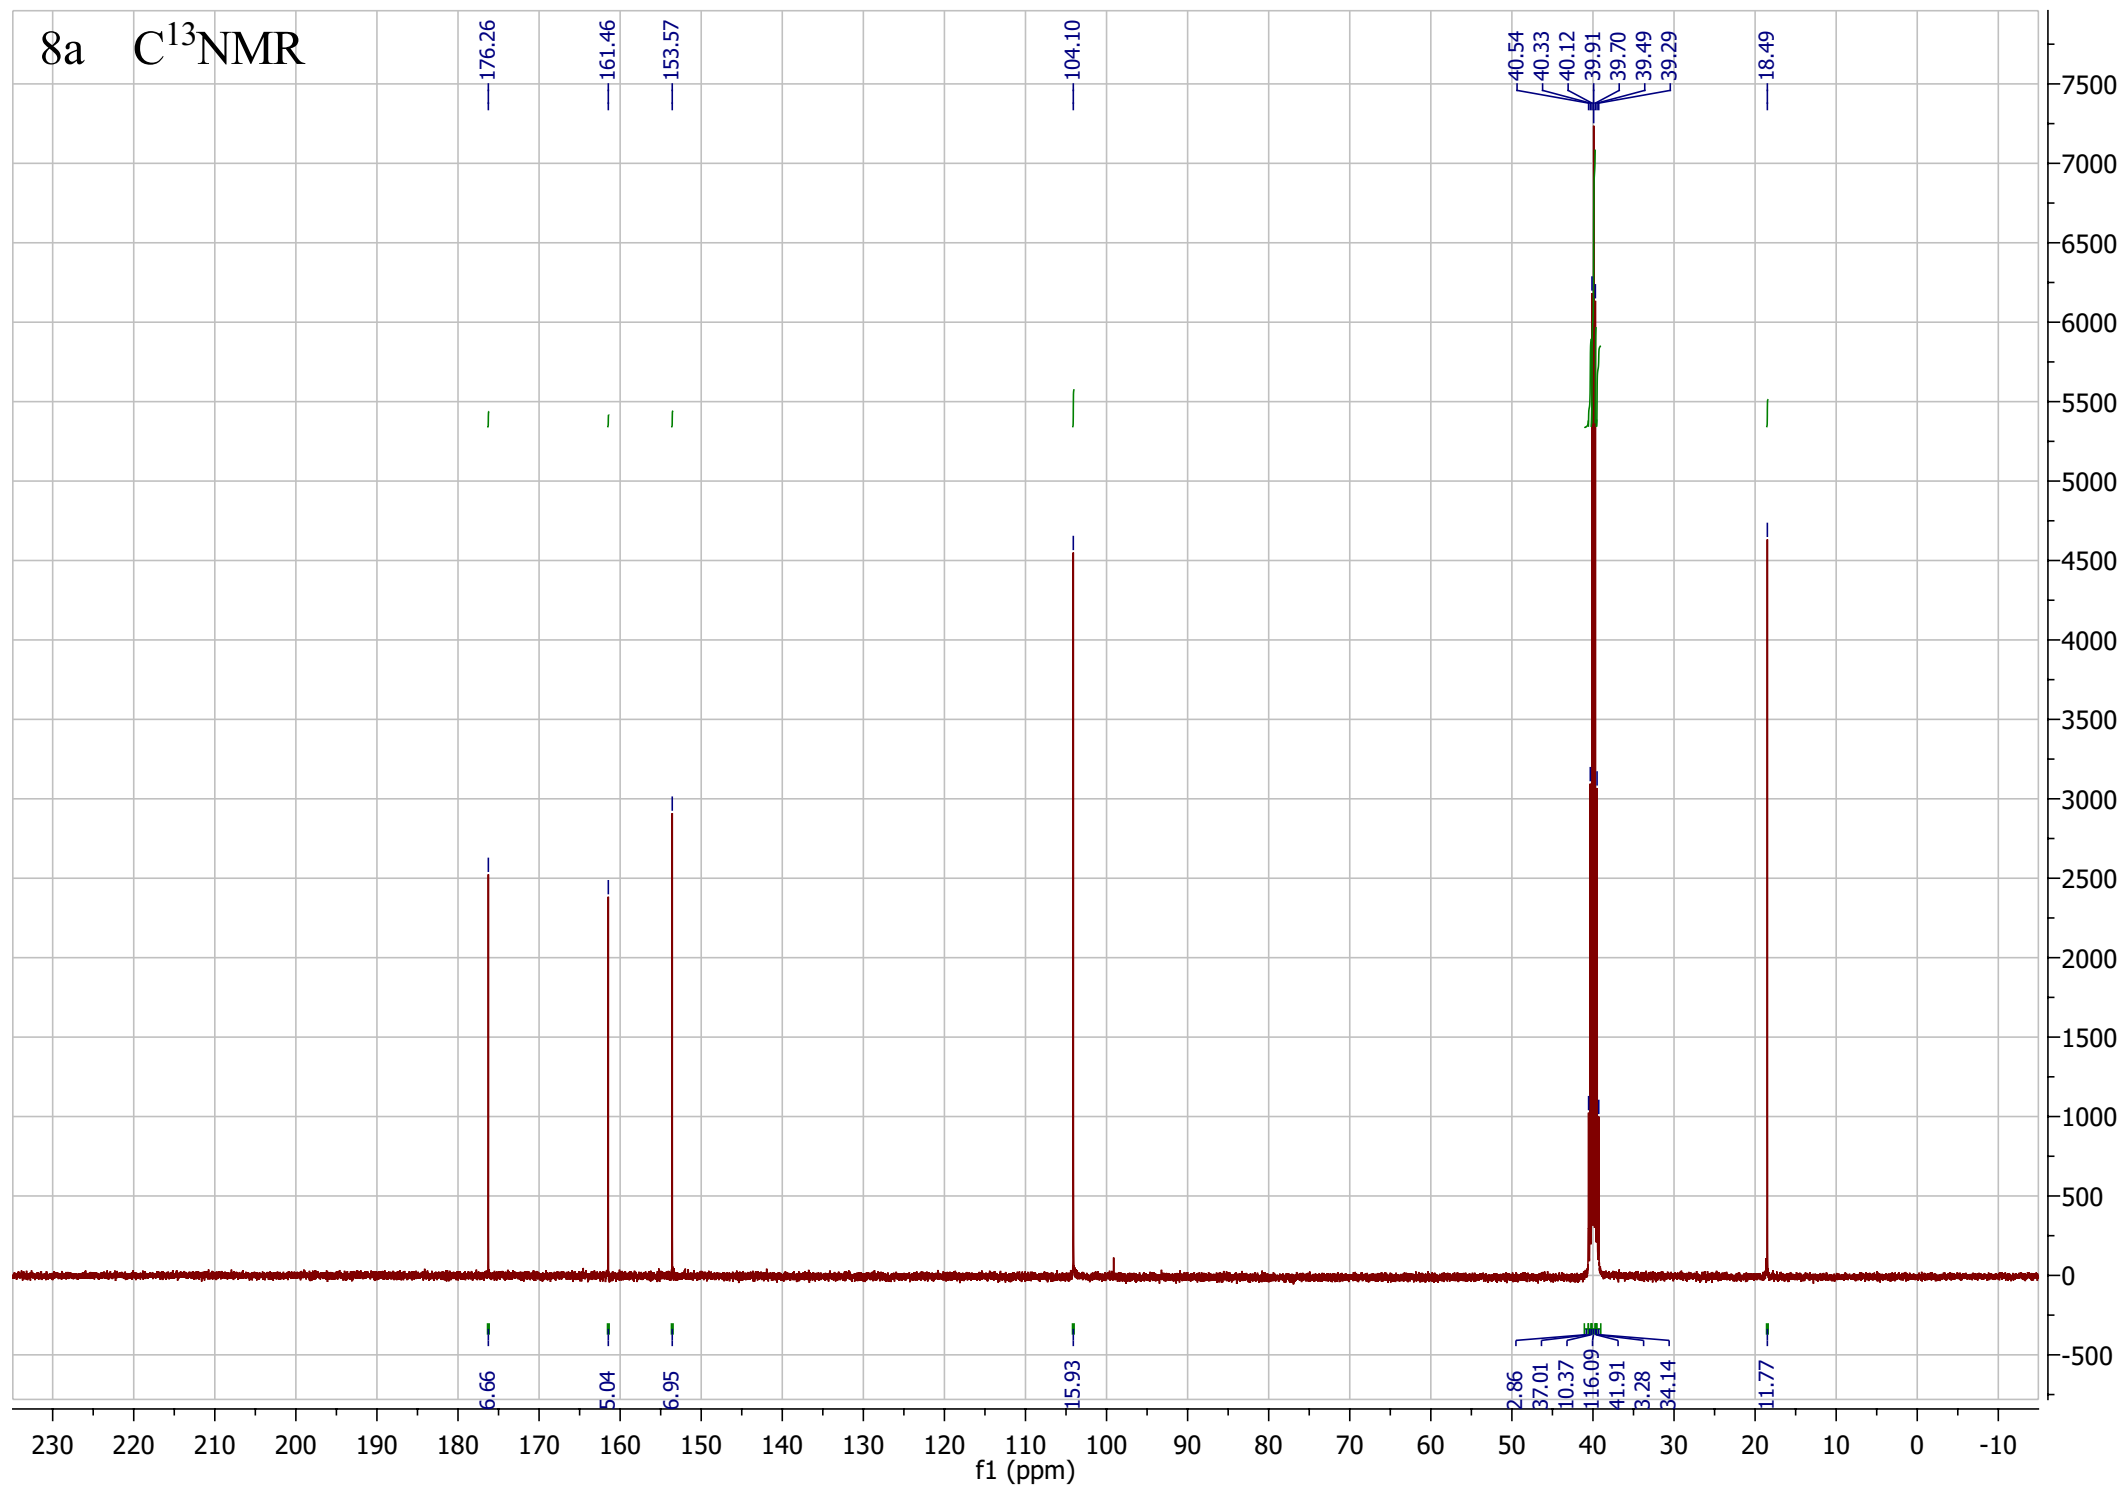

Compound 8b

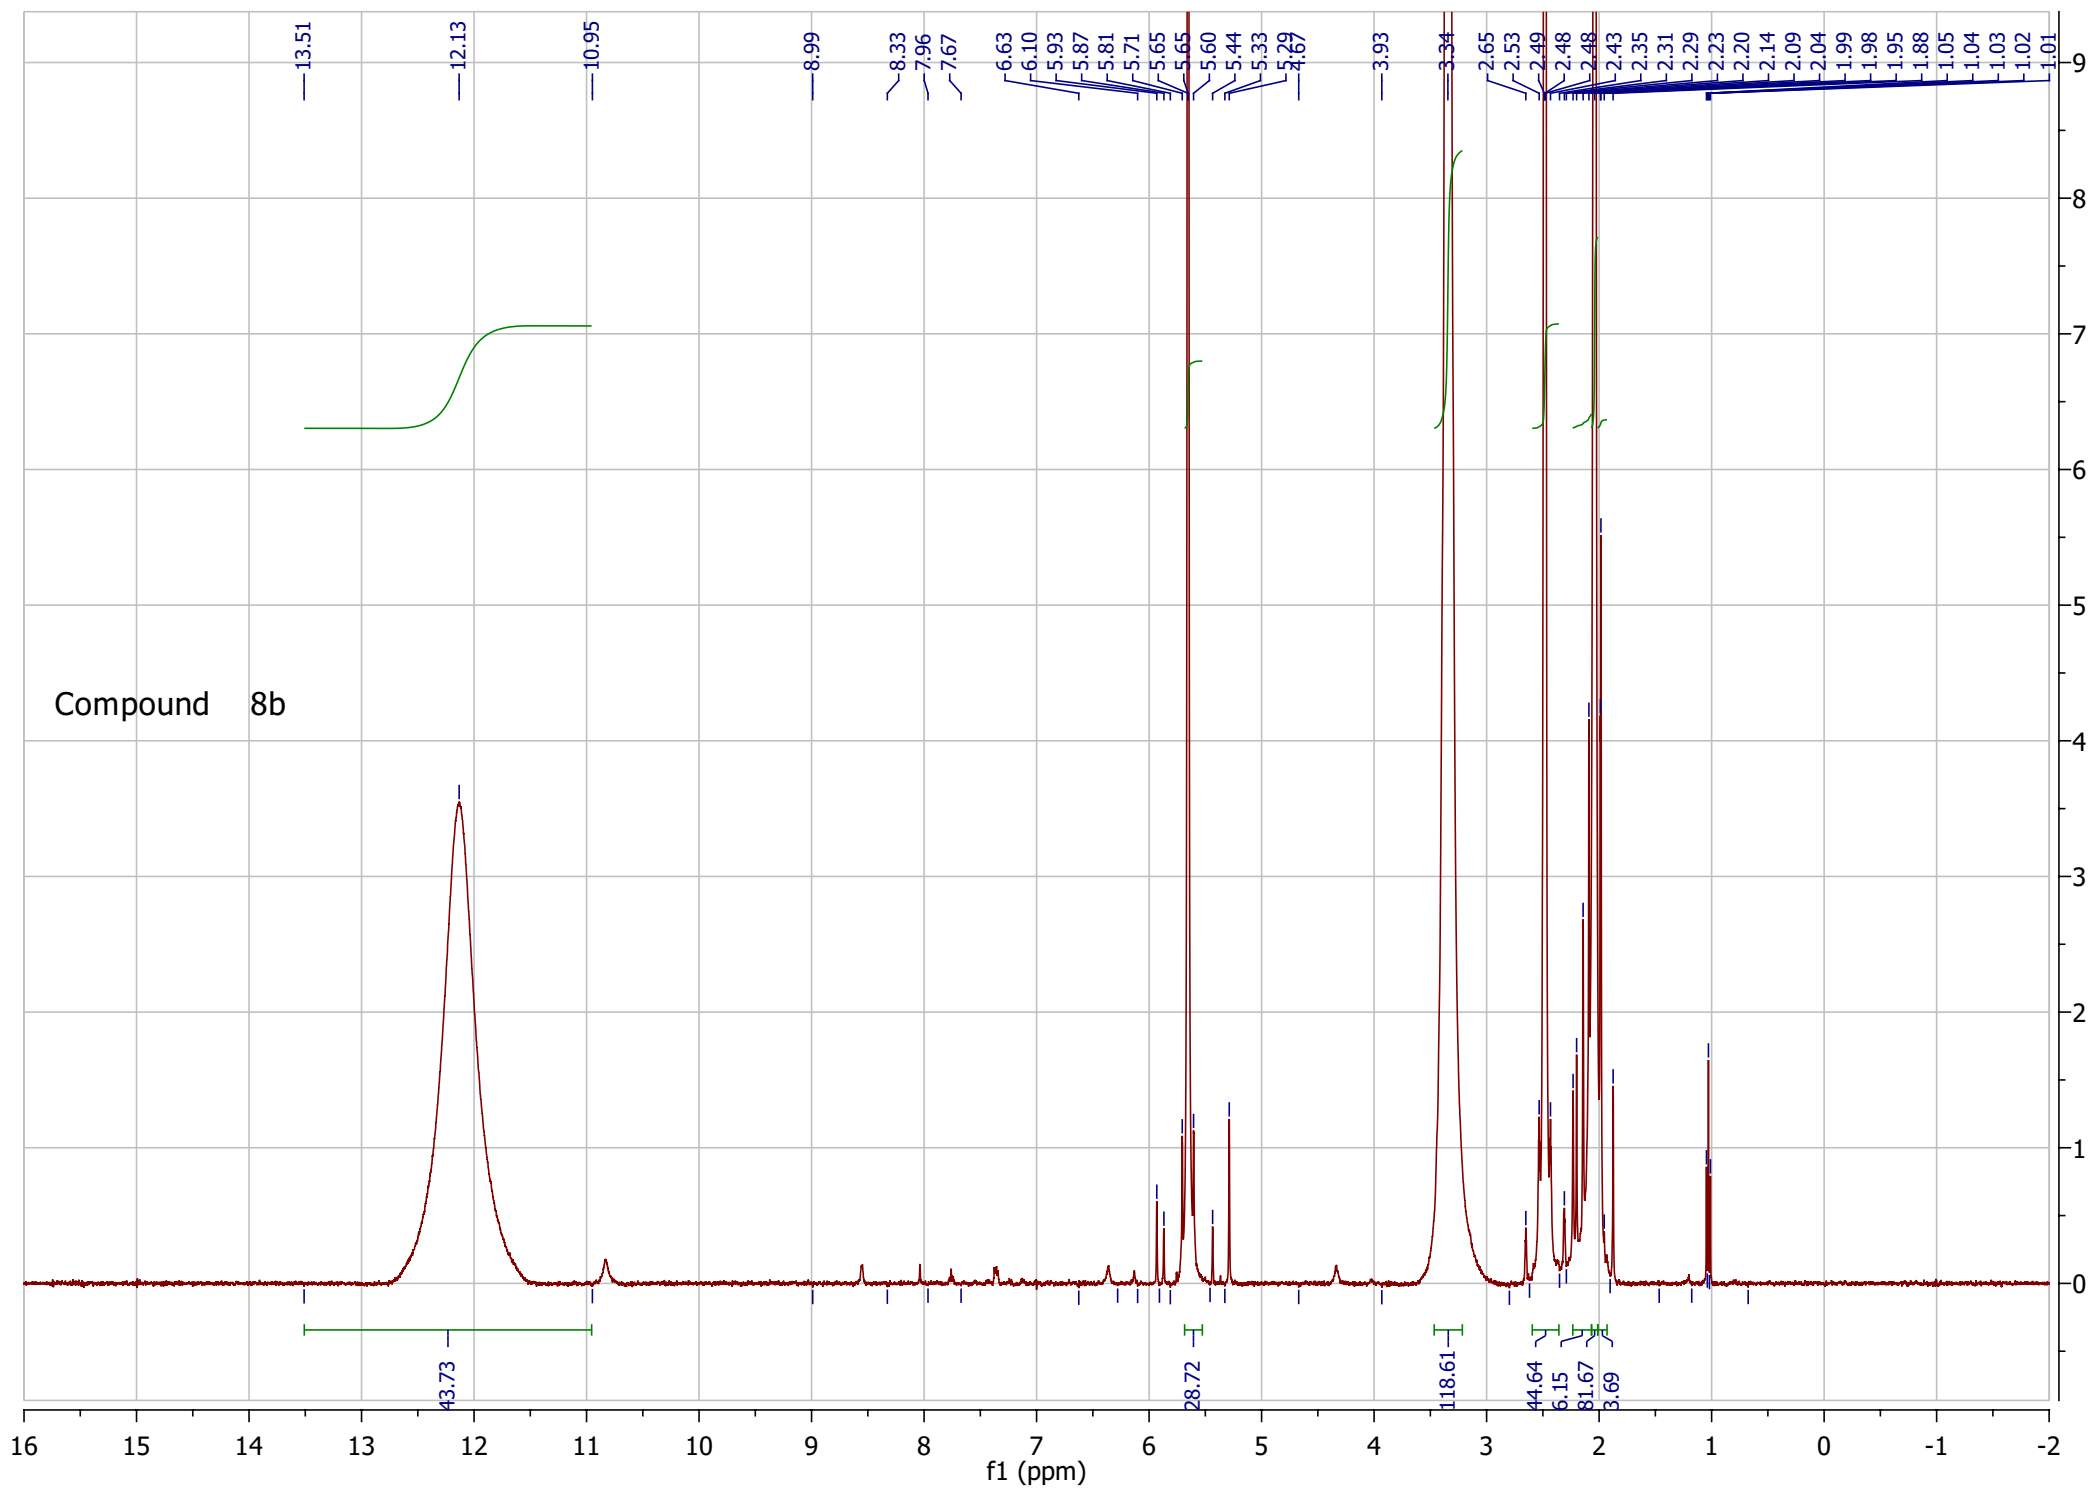

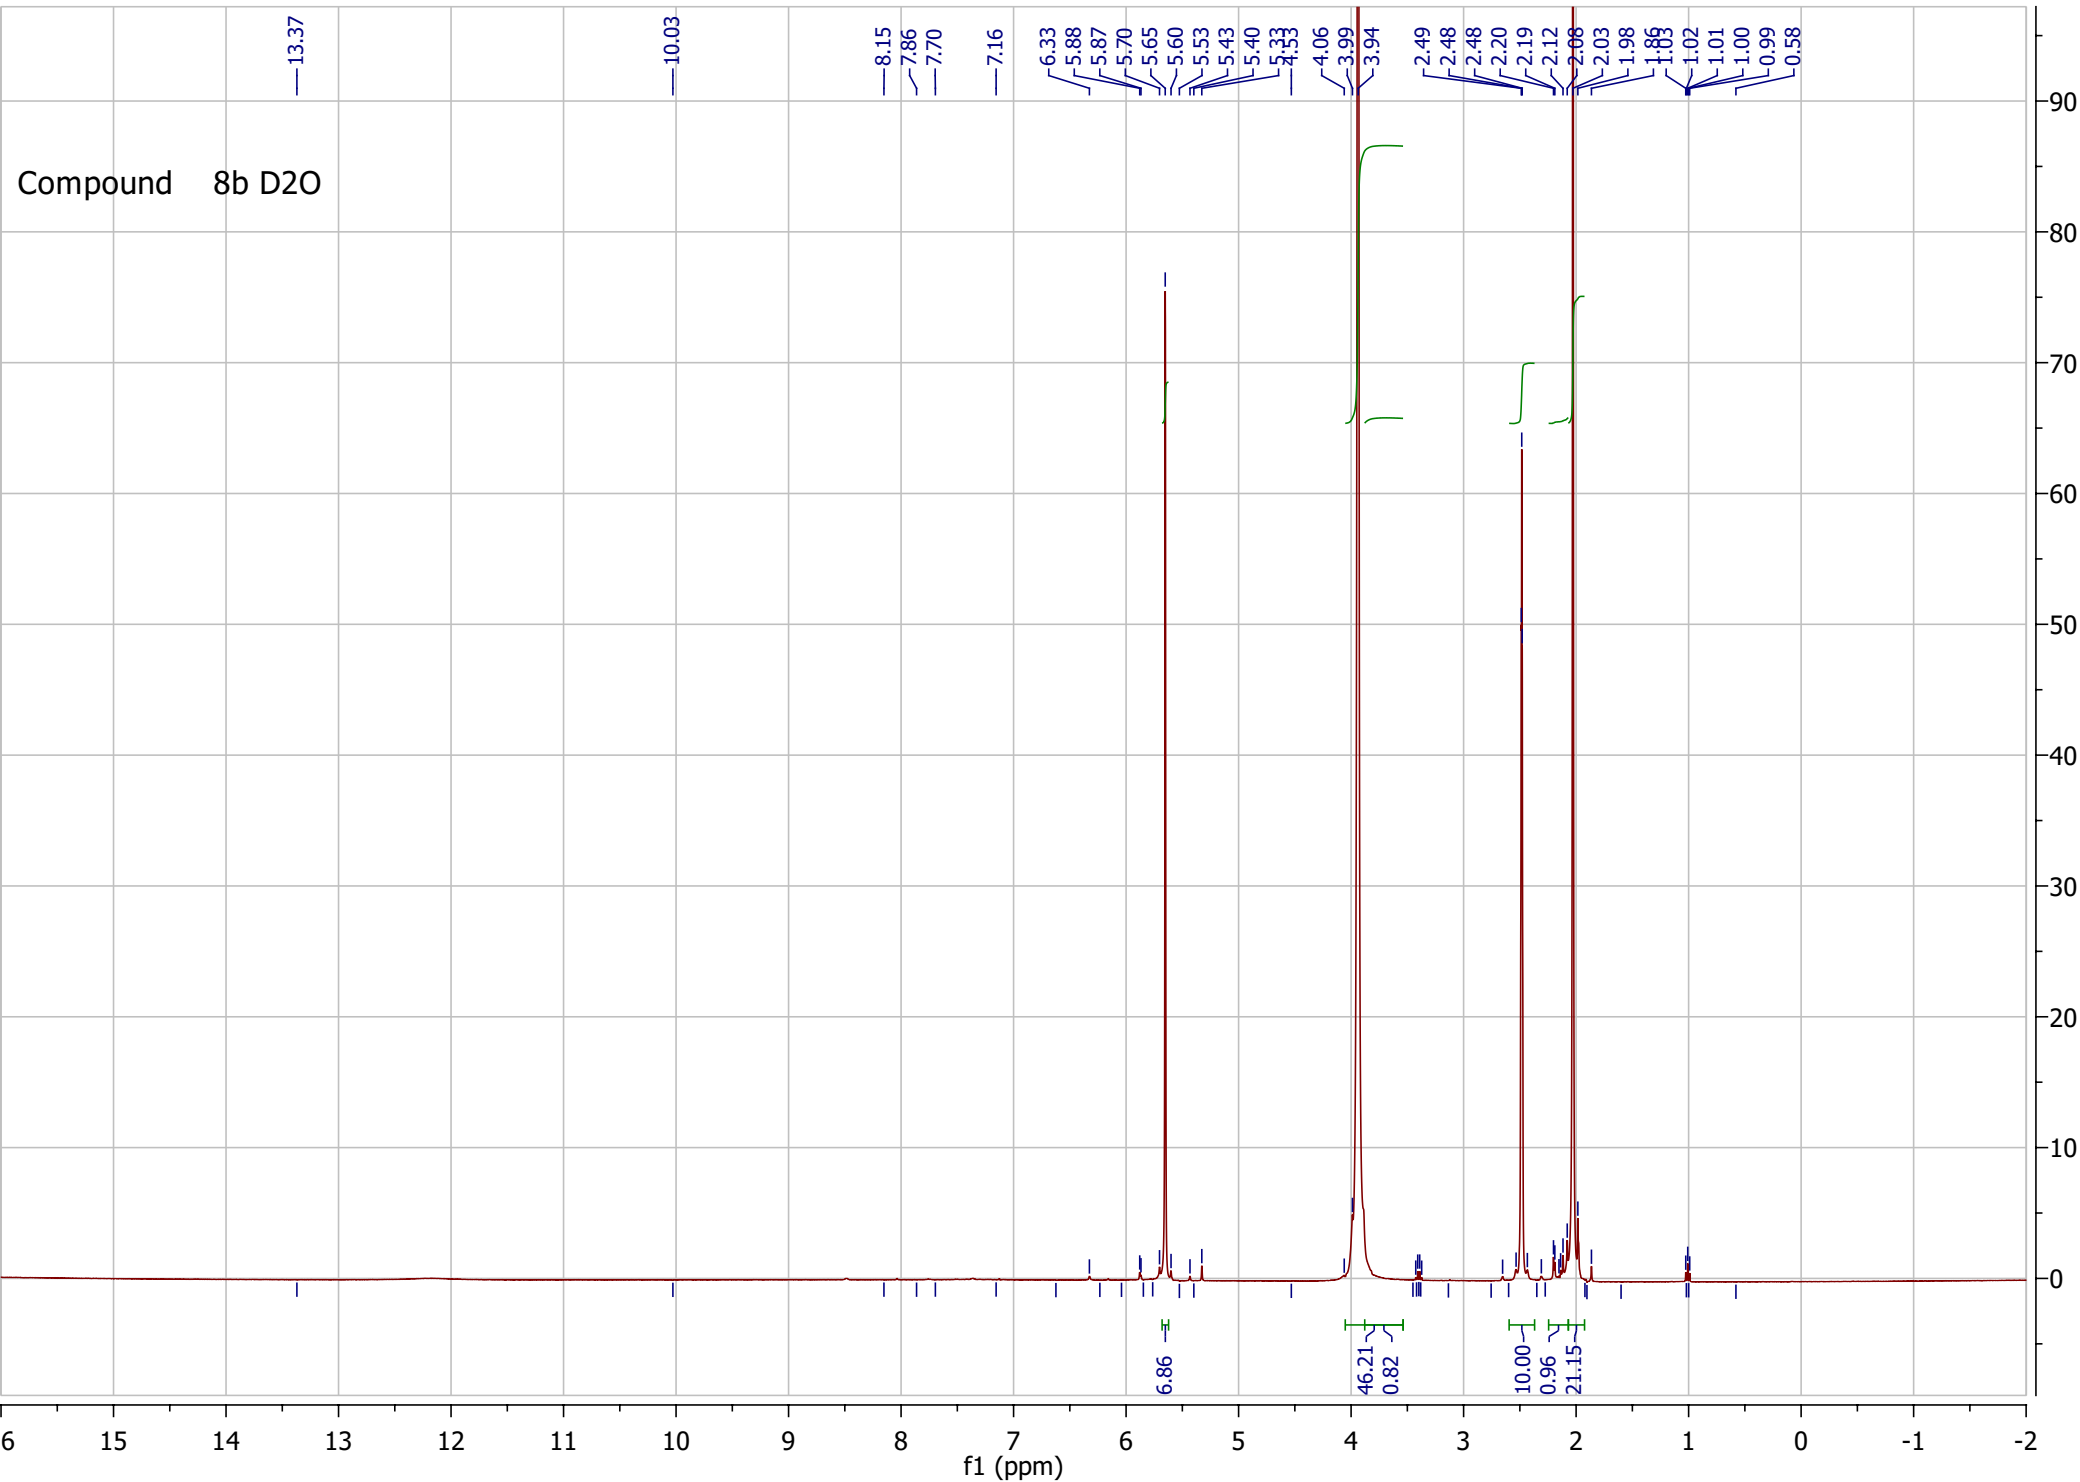

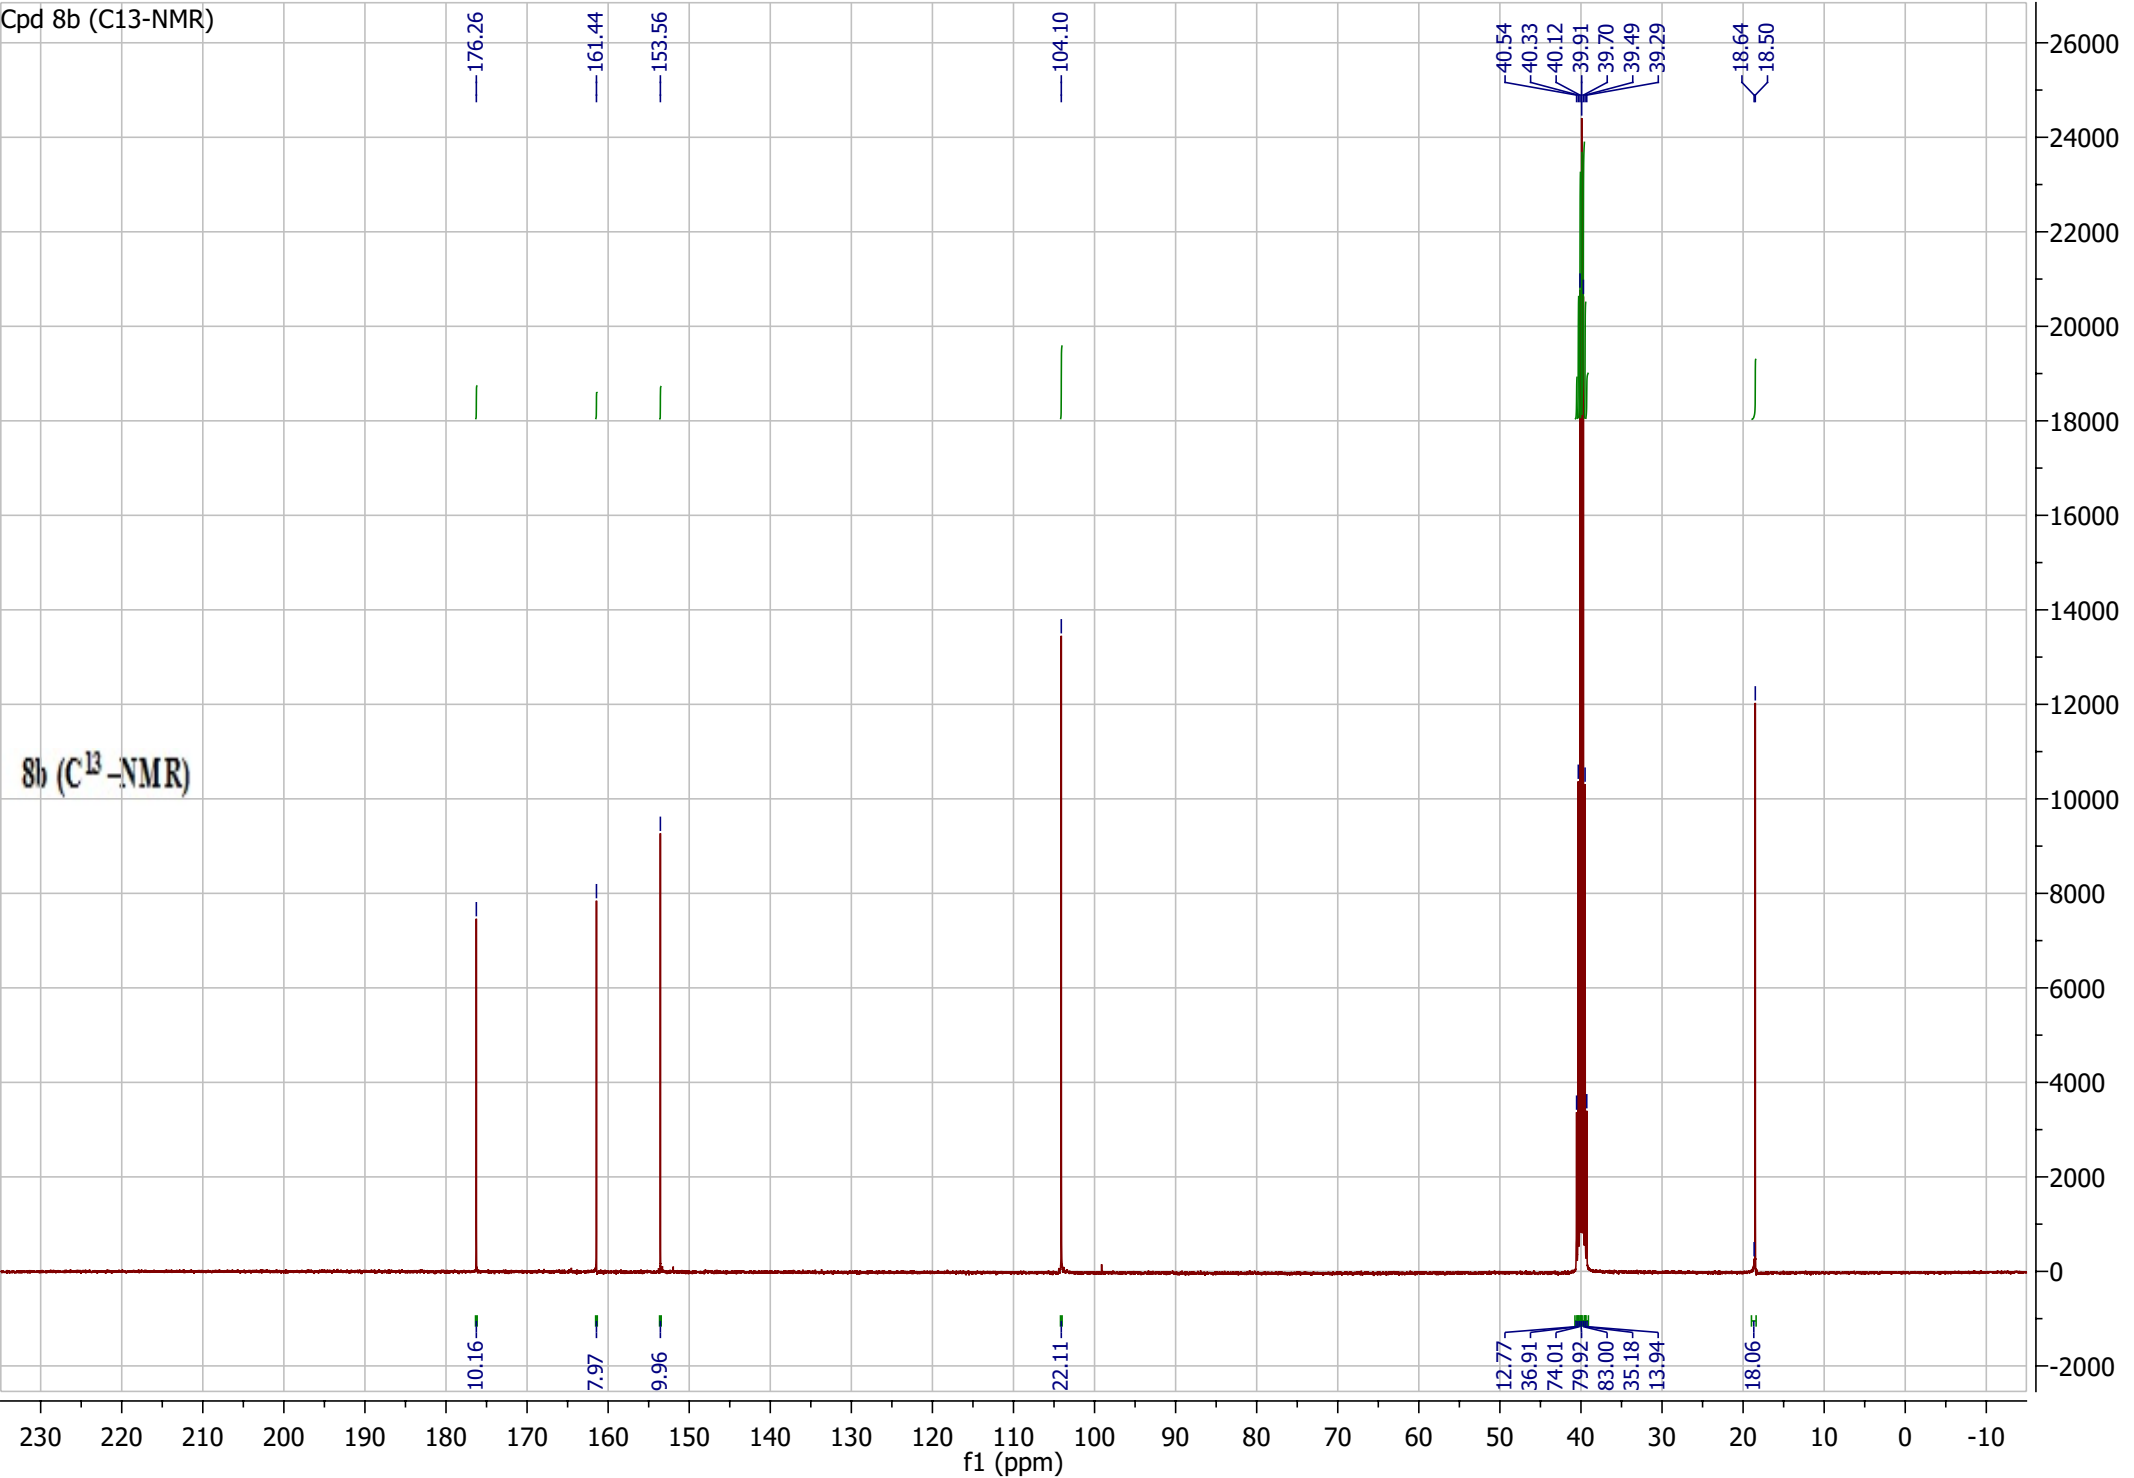



Cpd 8c

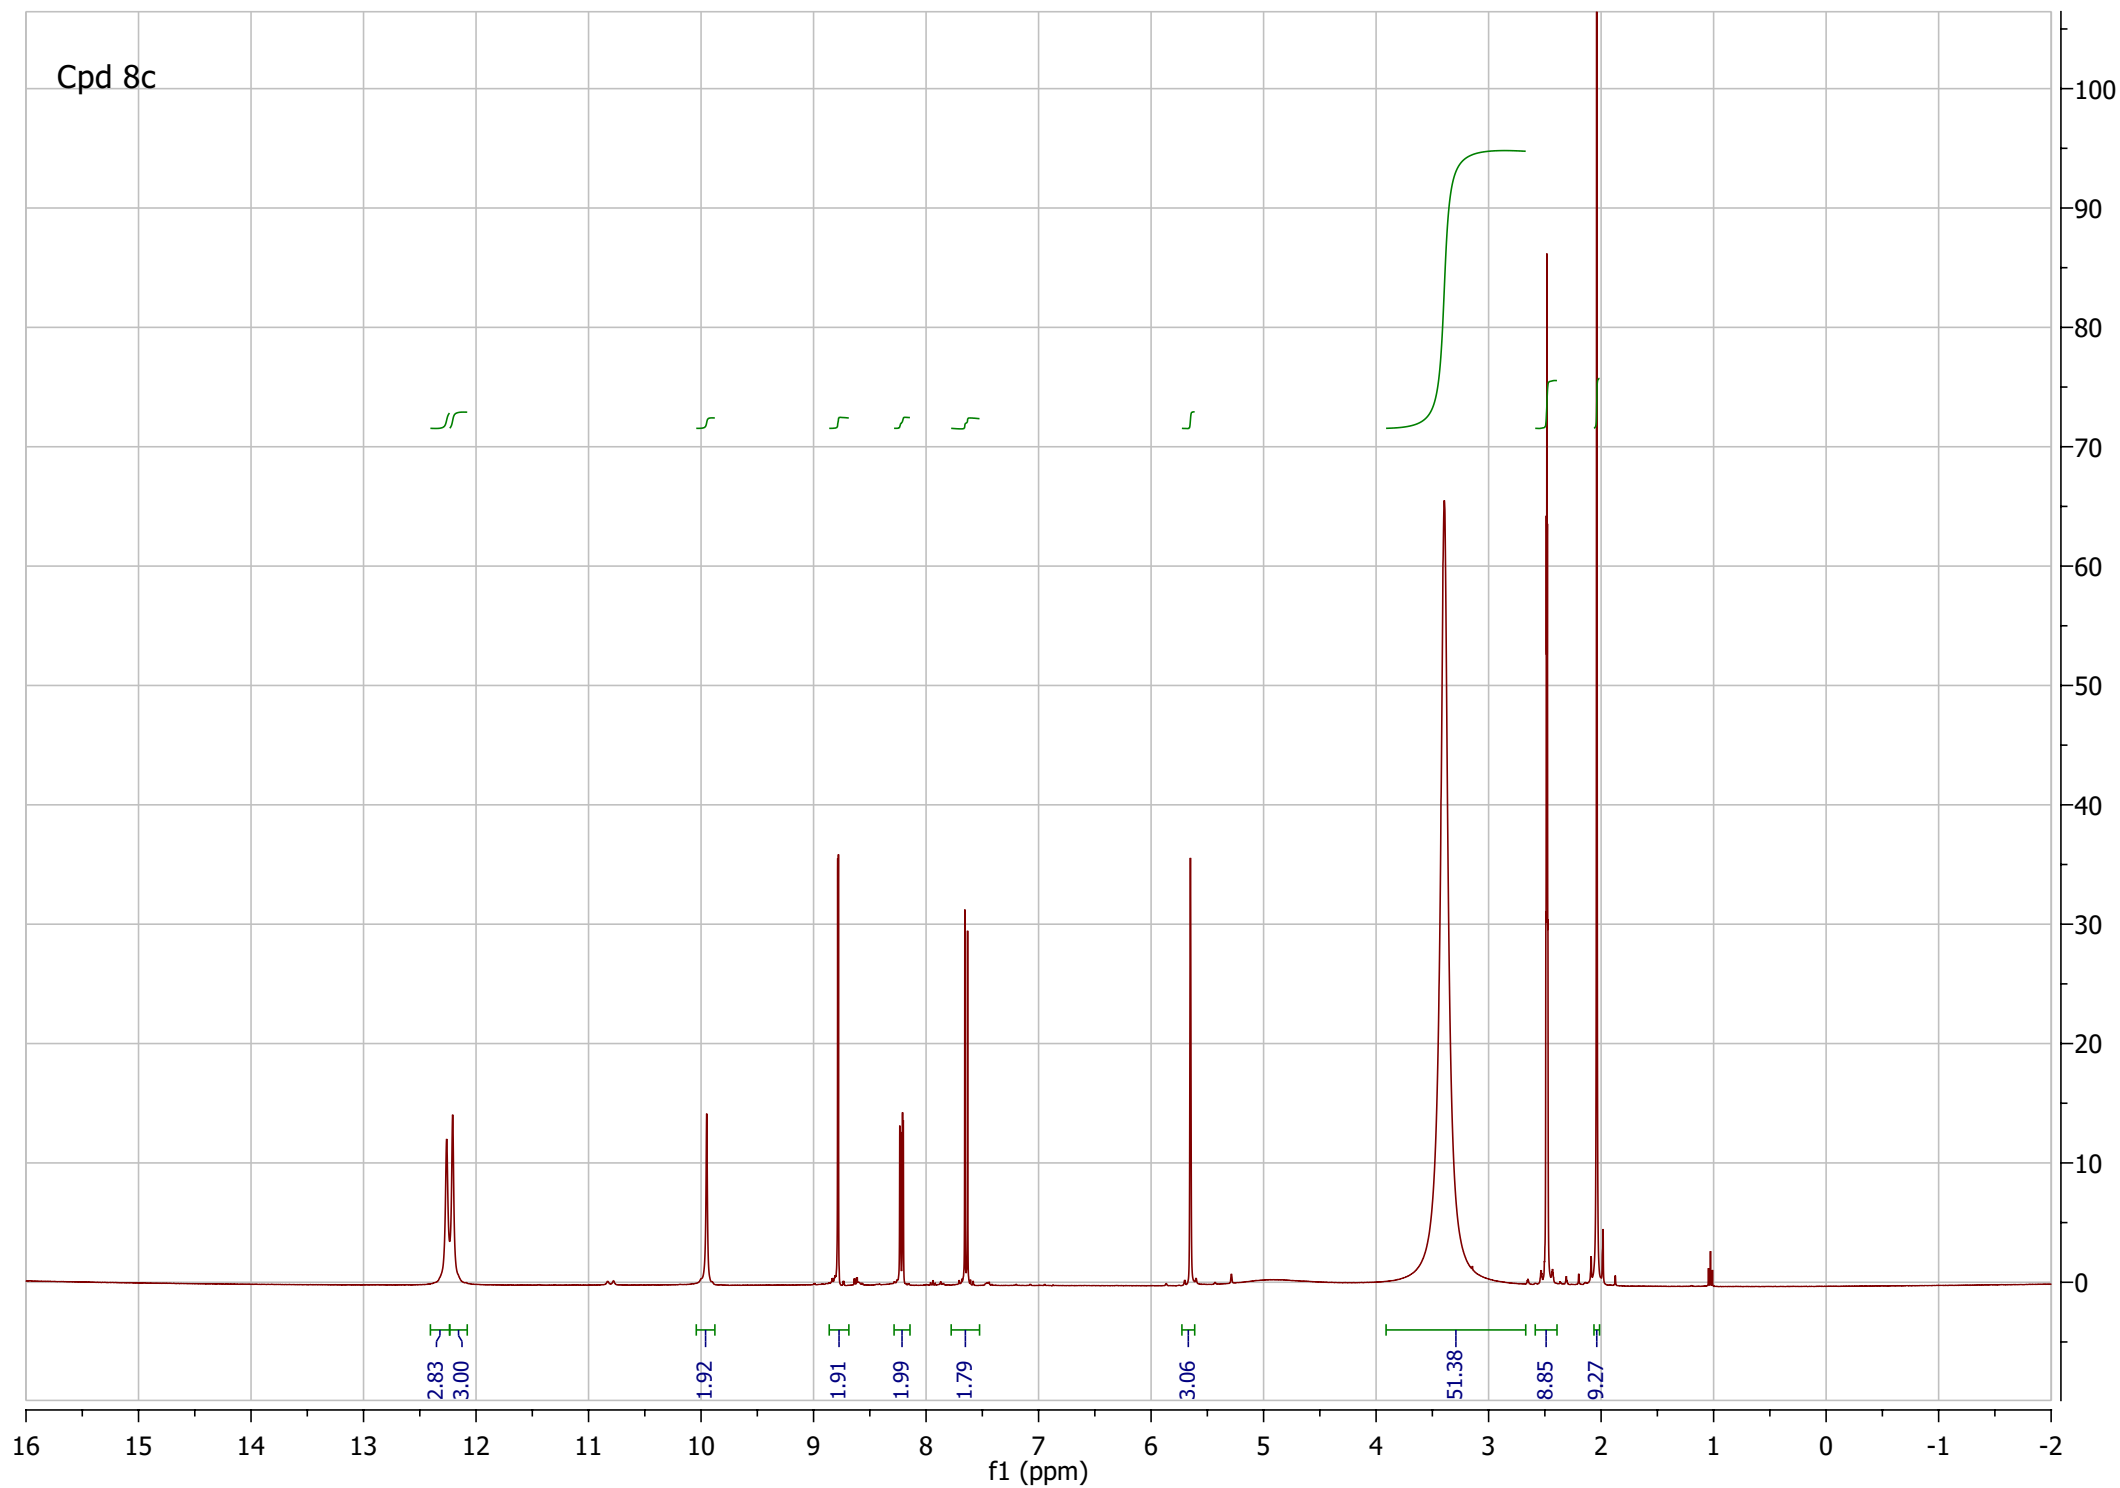

8c D2O H-NMR

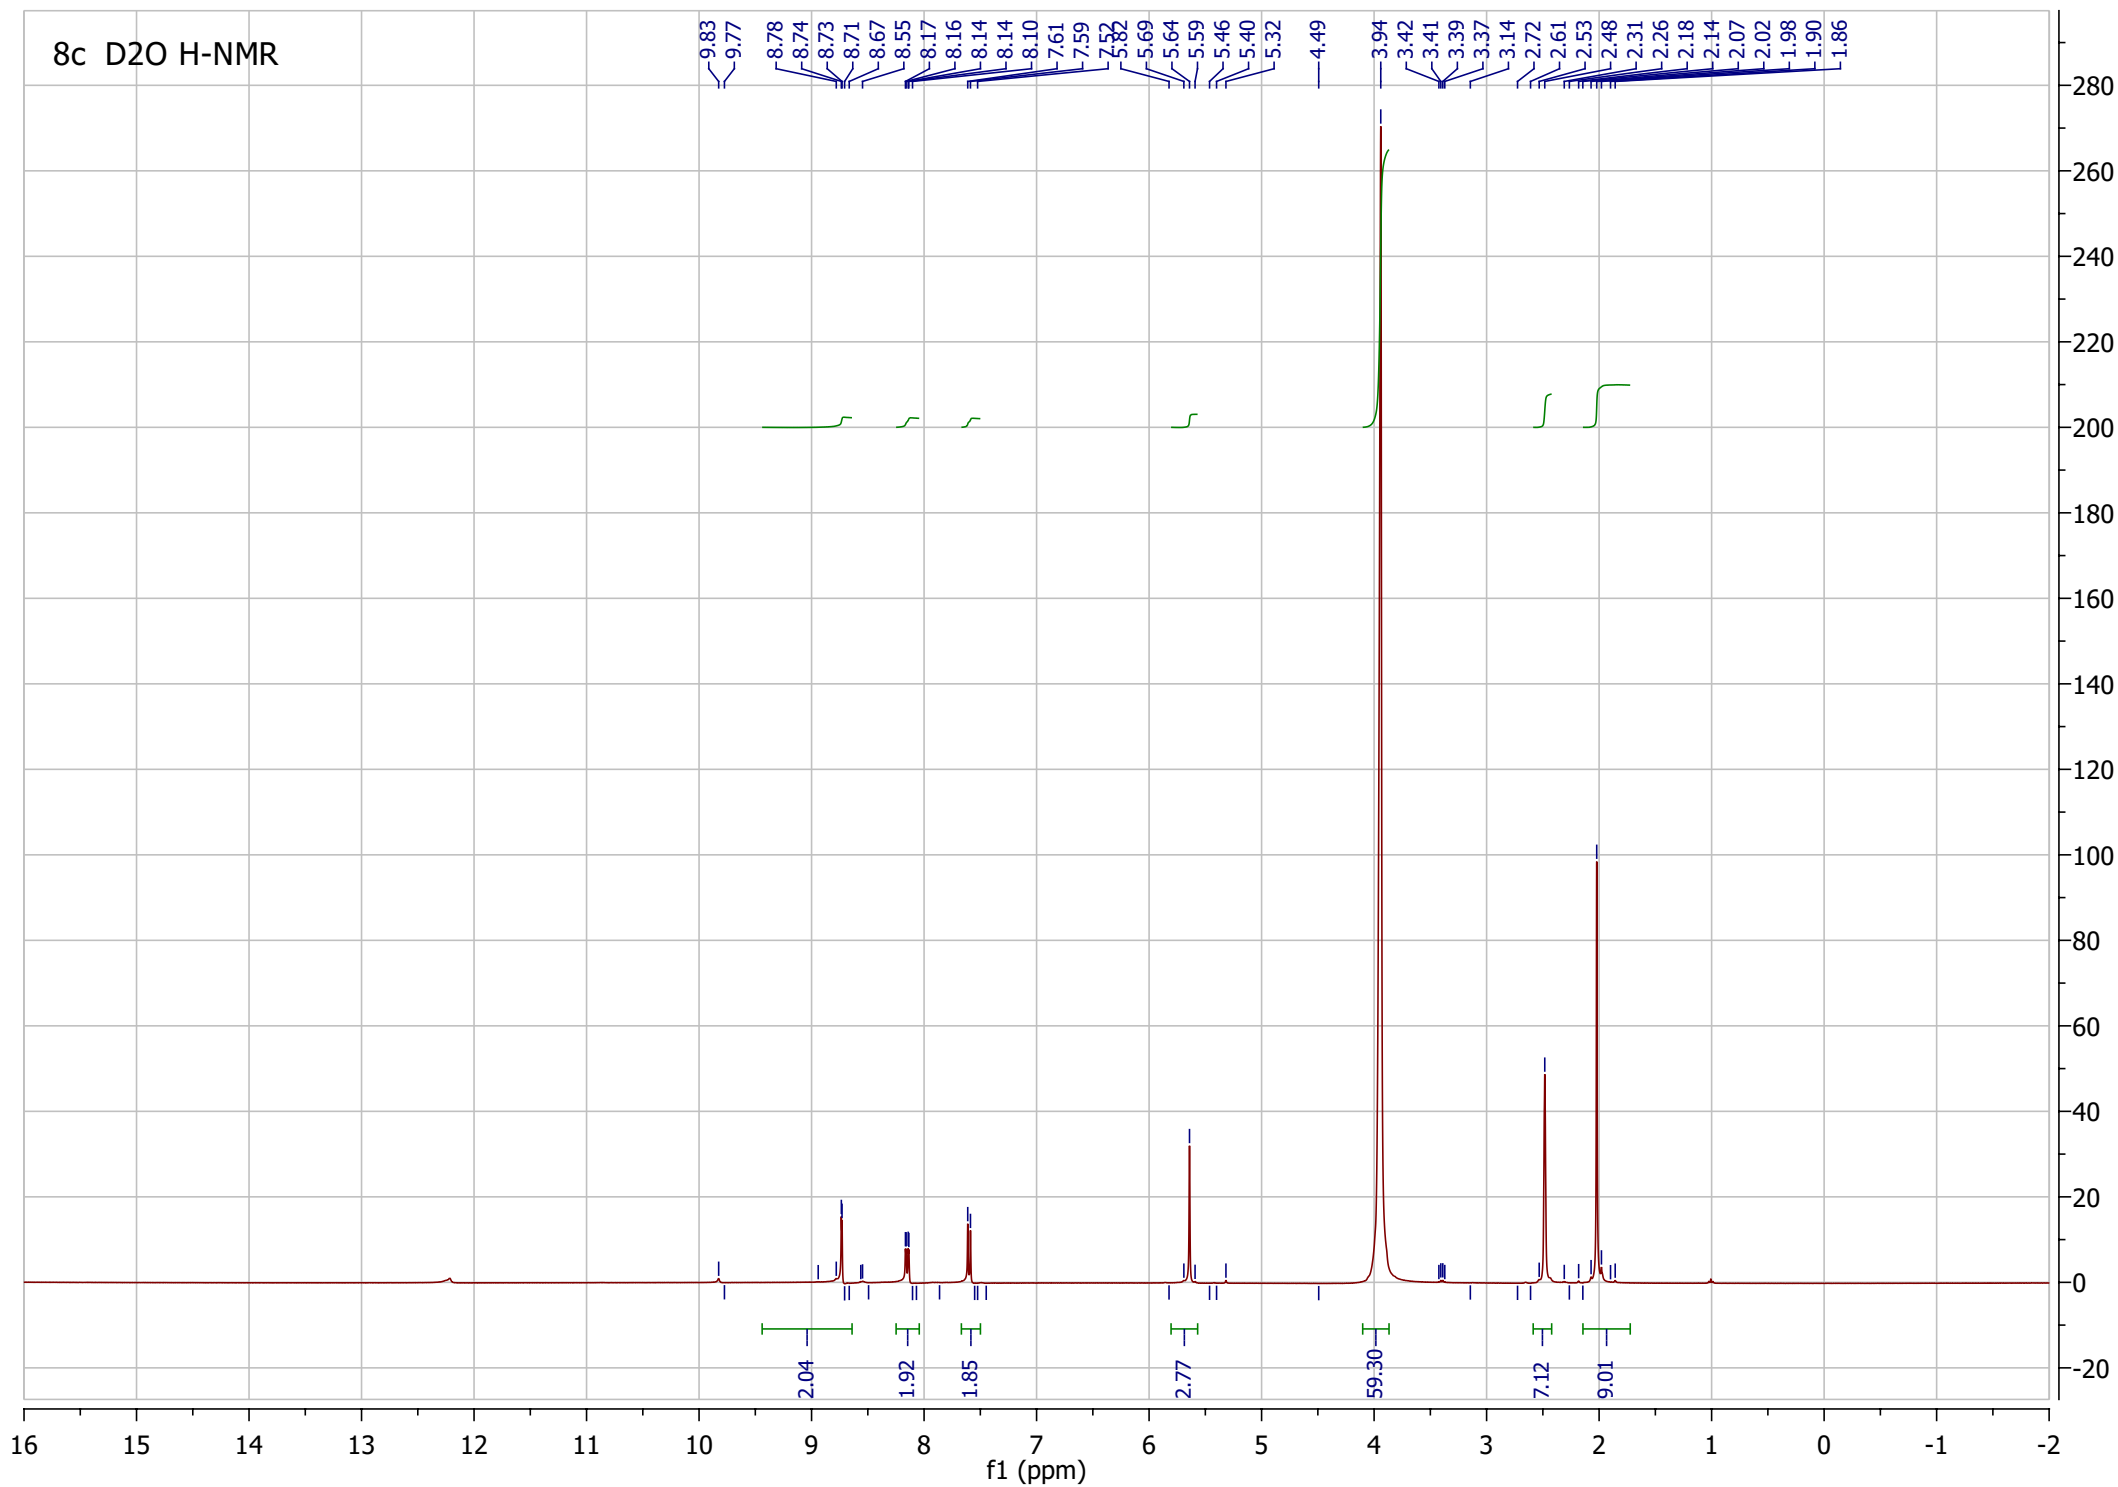

8c C13-NMR

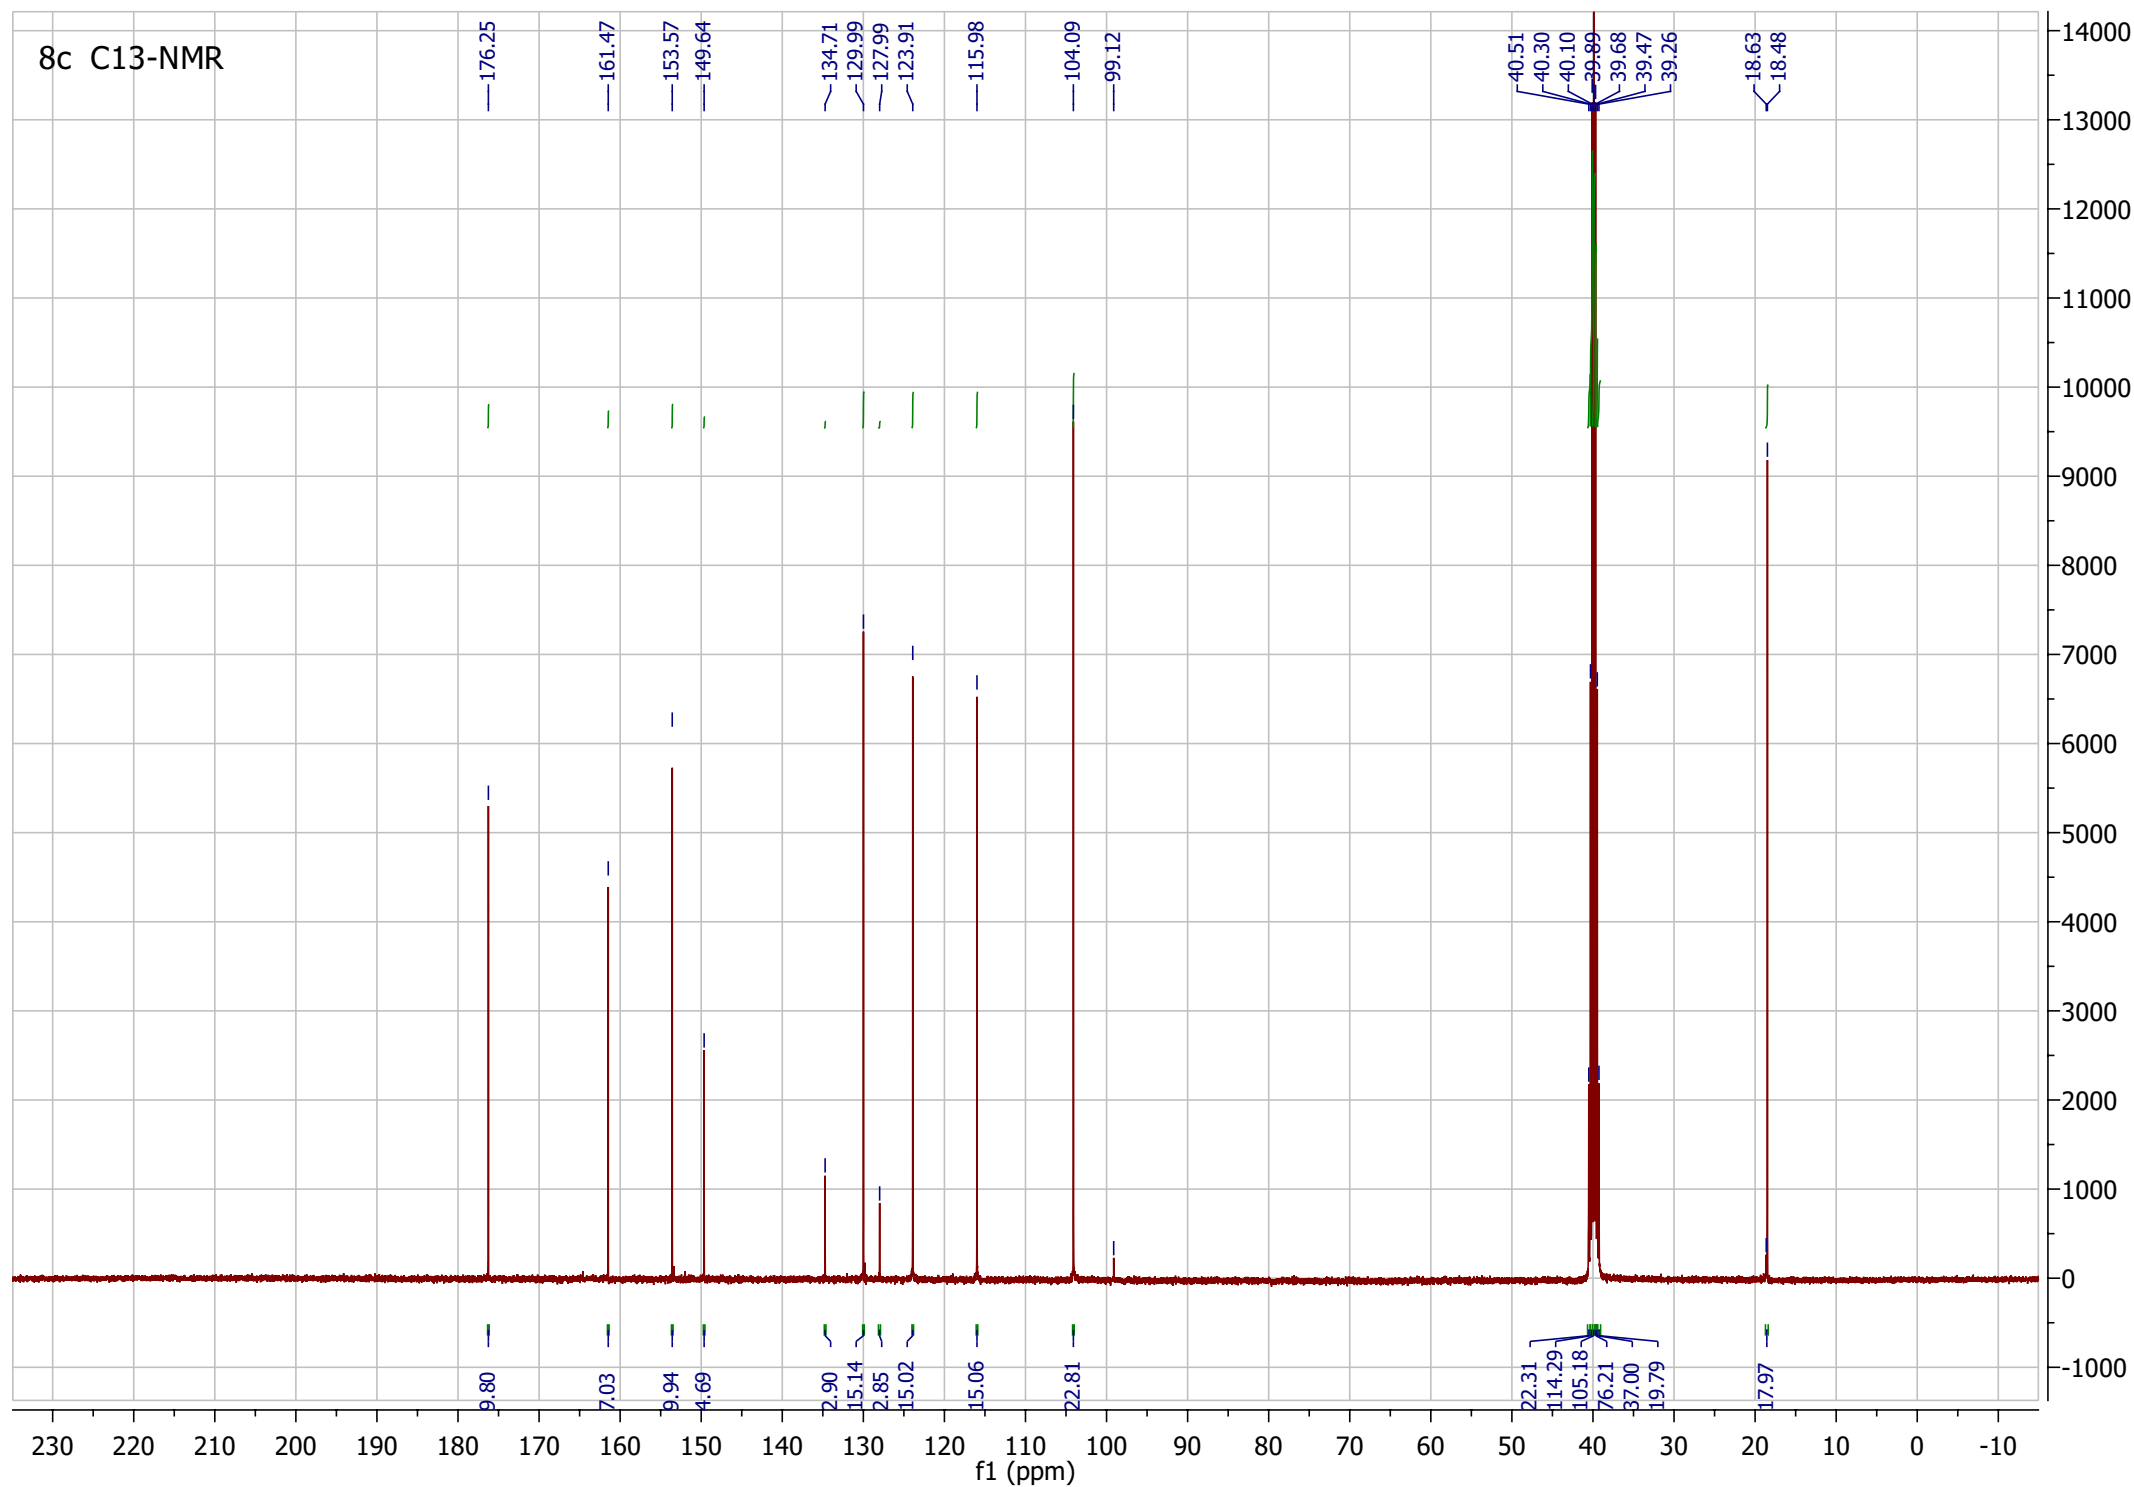

Cpd 9a

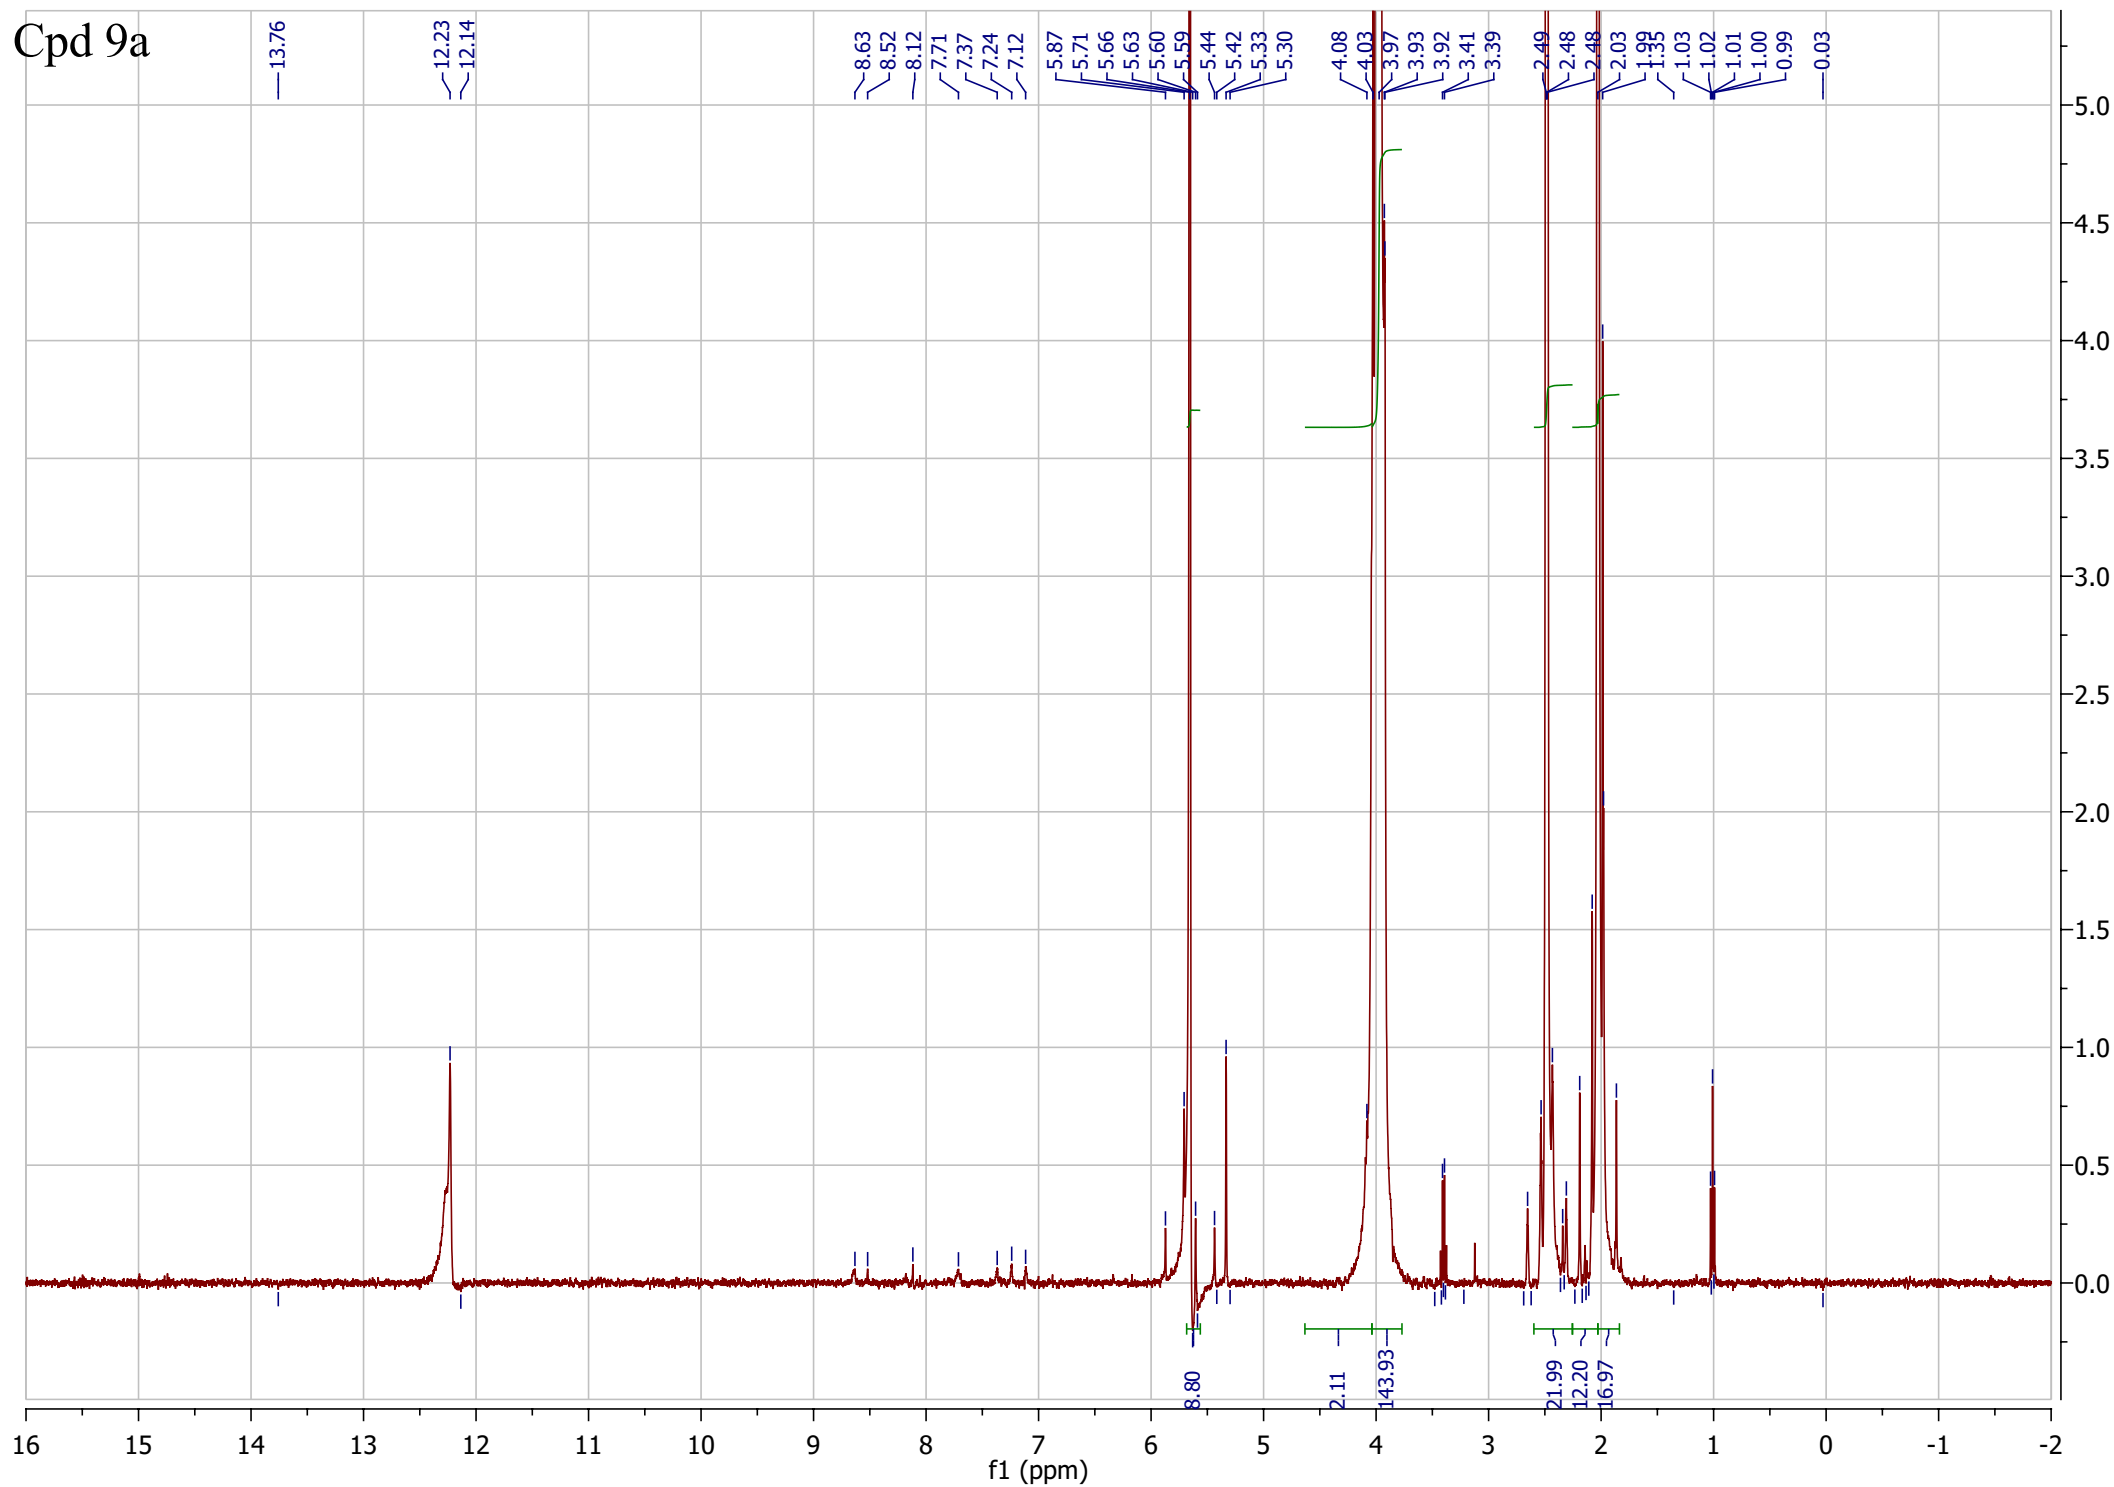

Cpd 9b

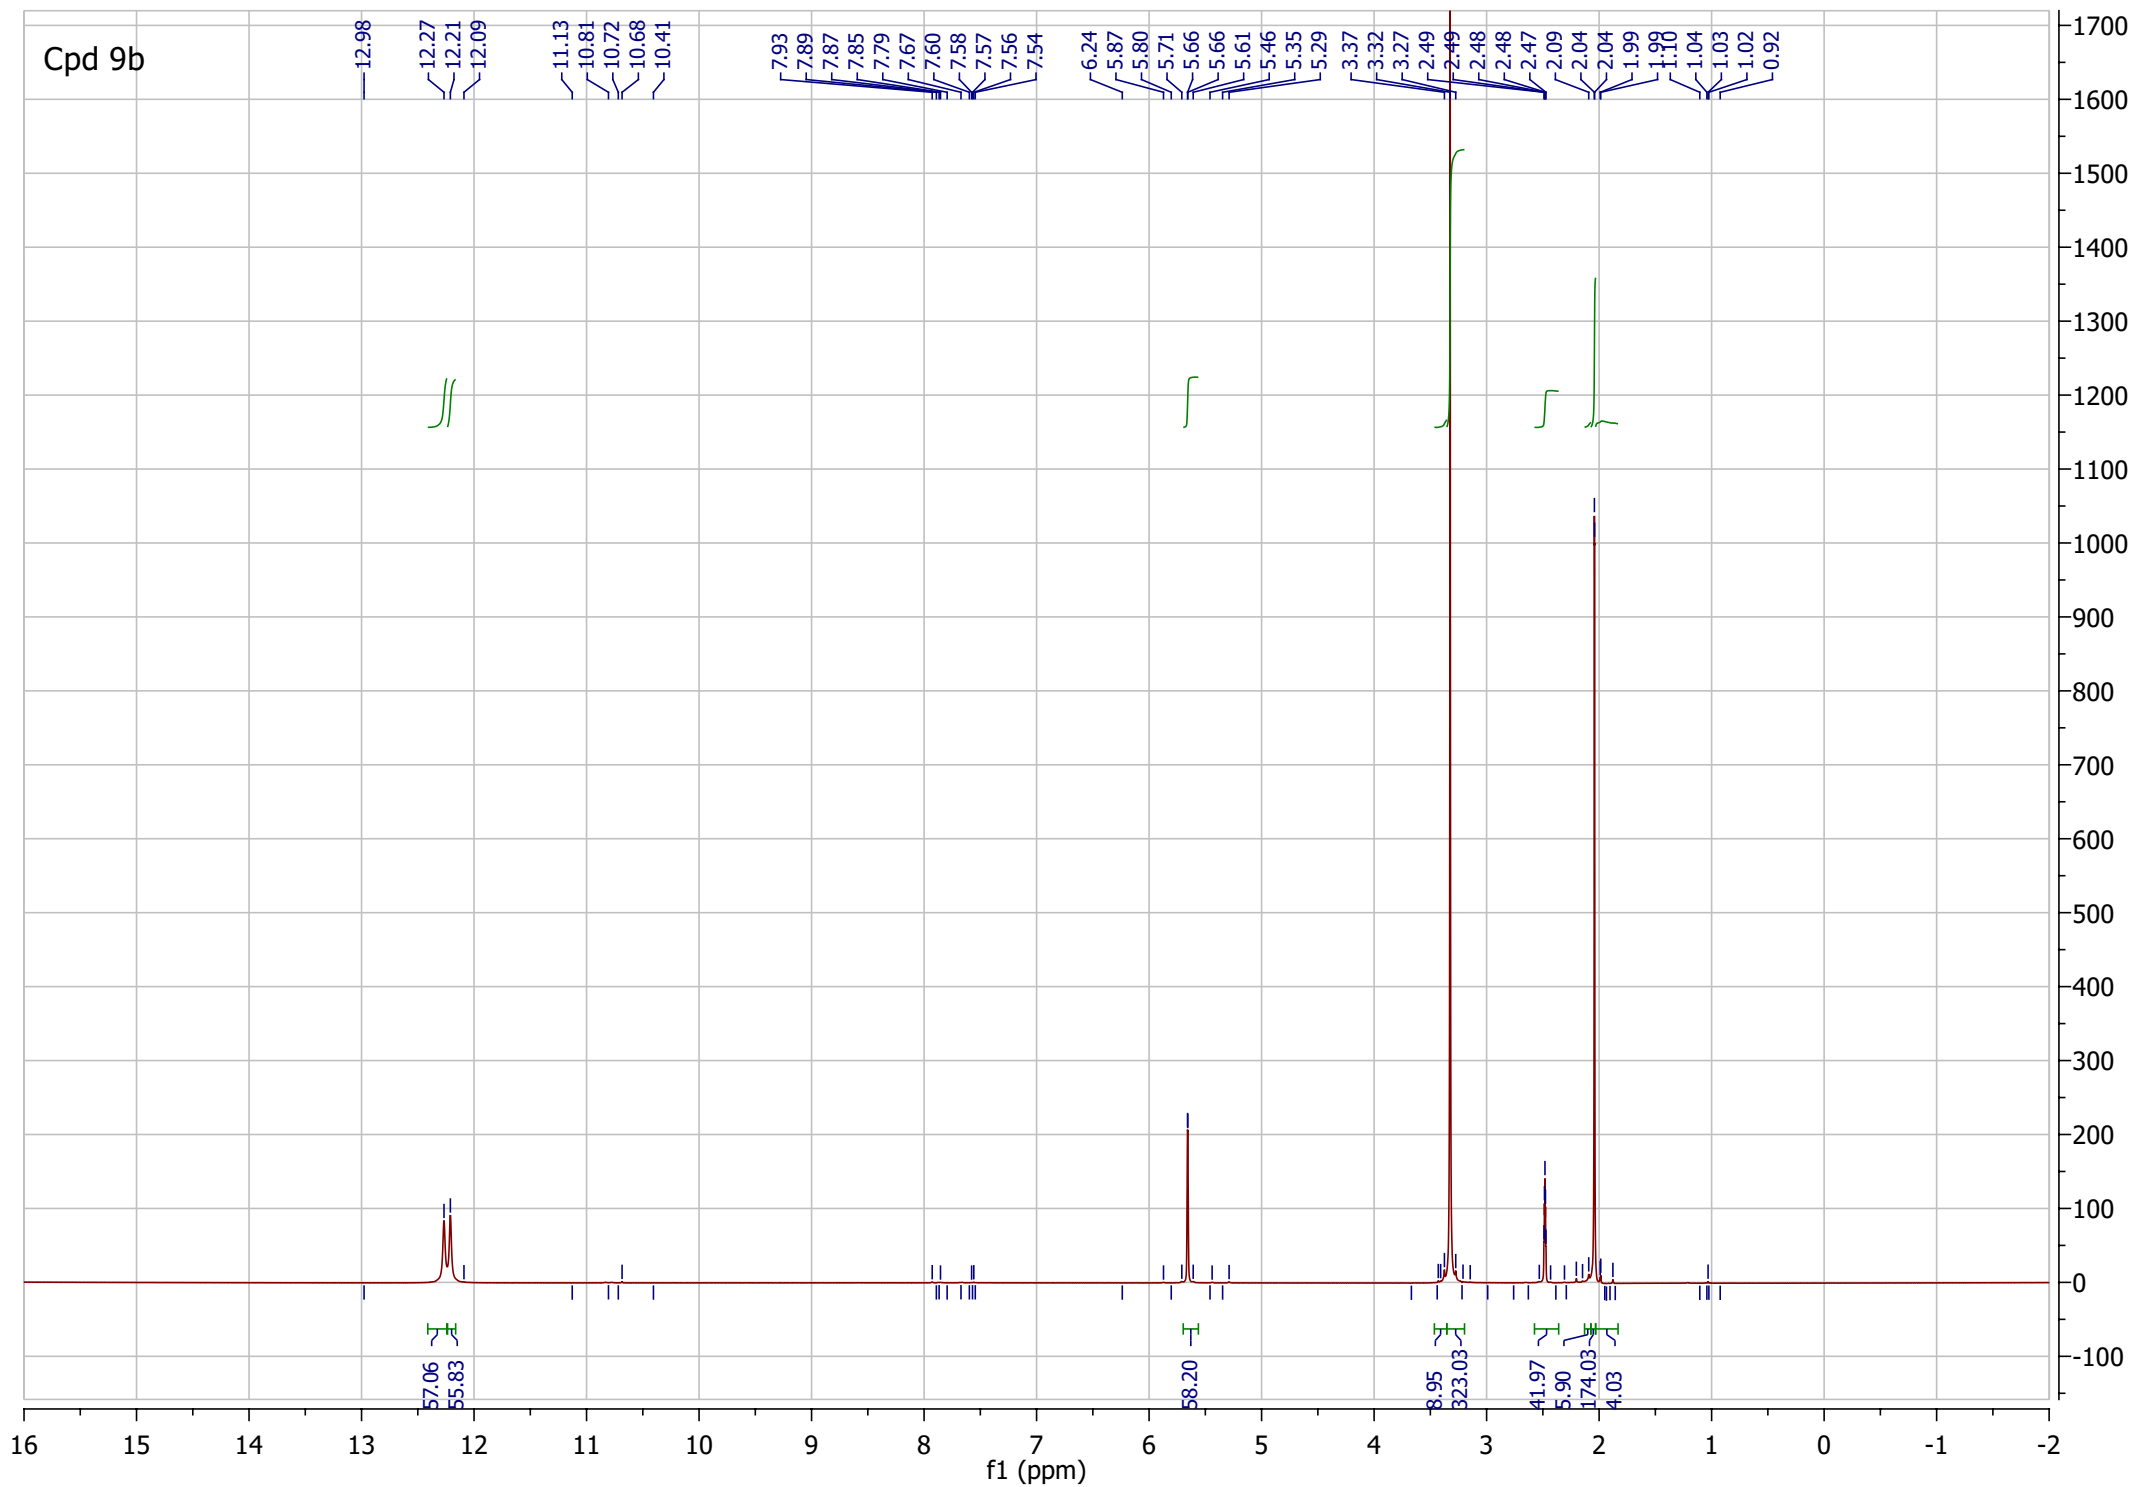

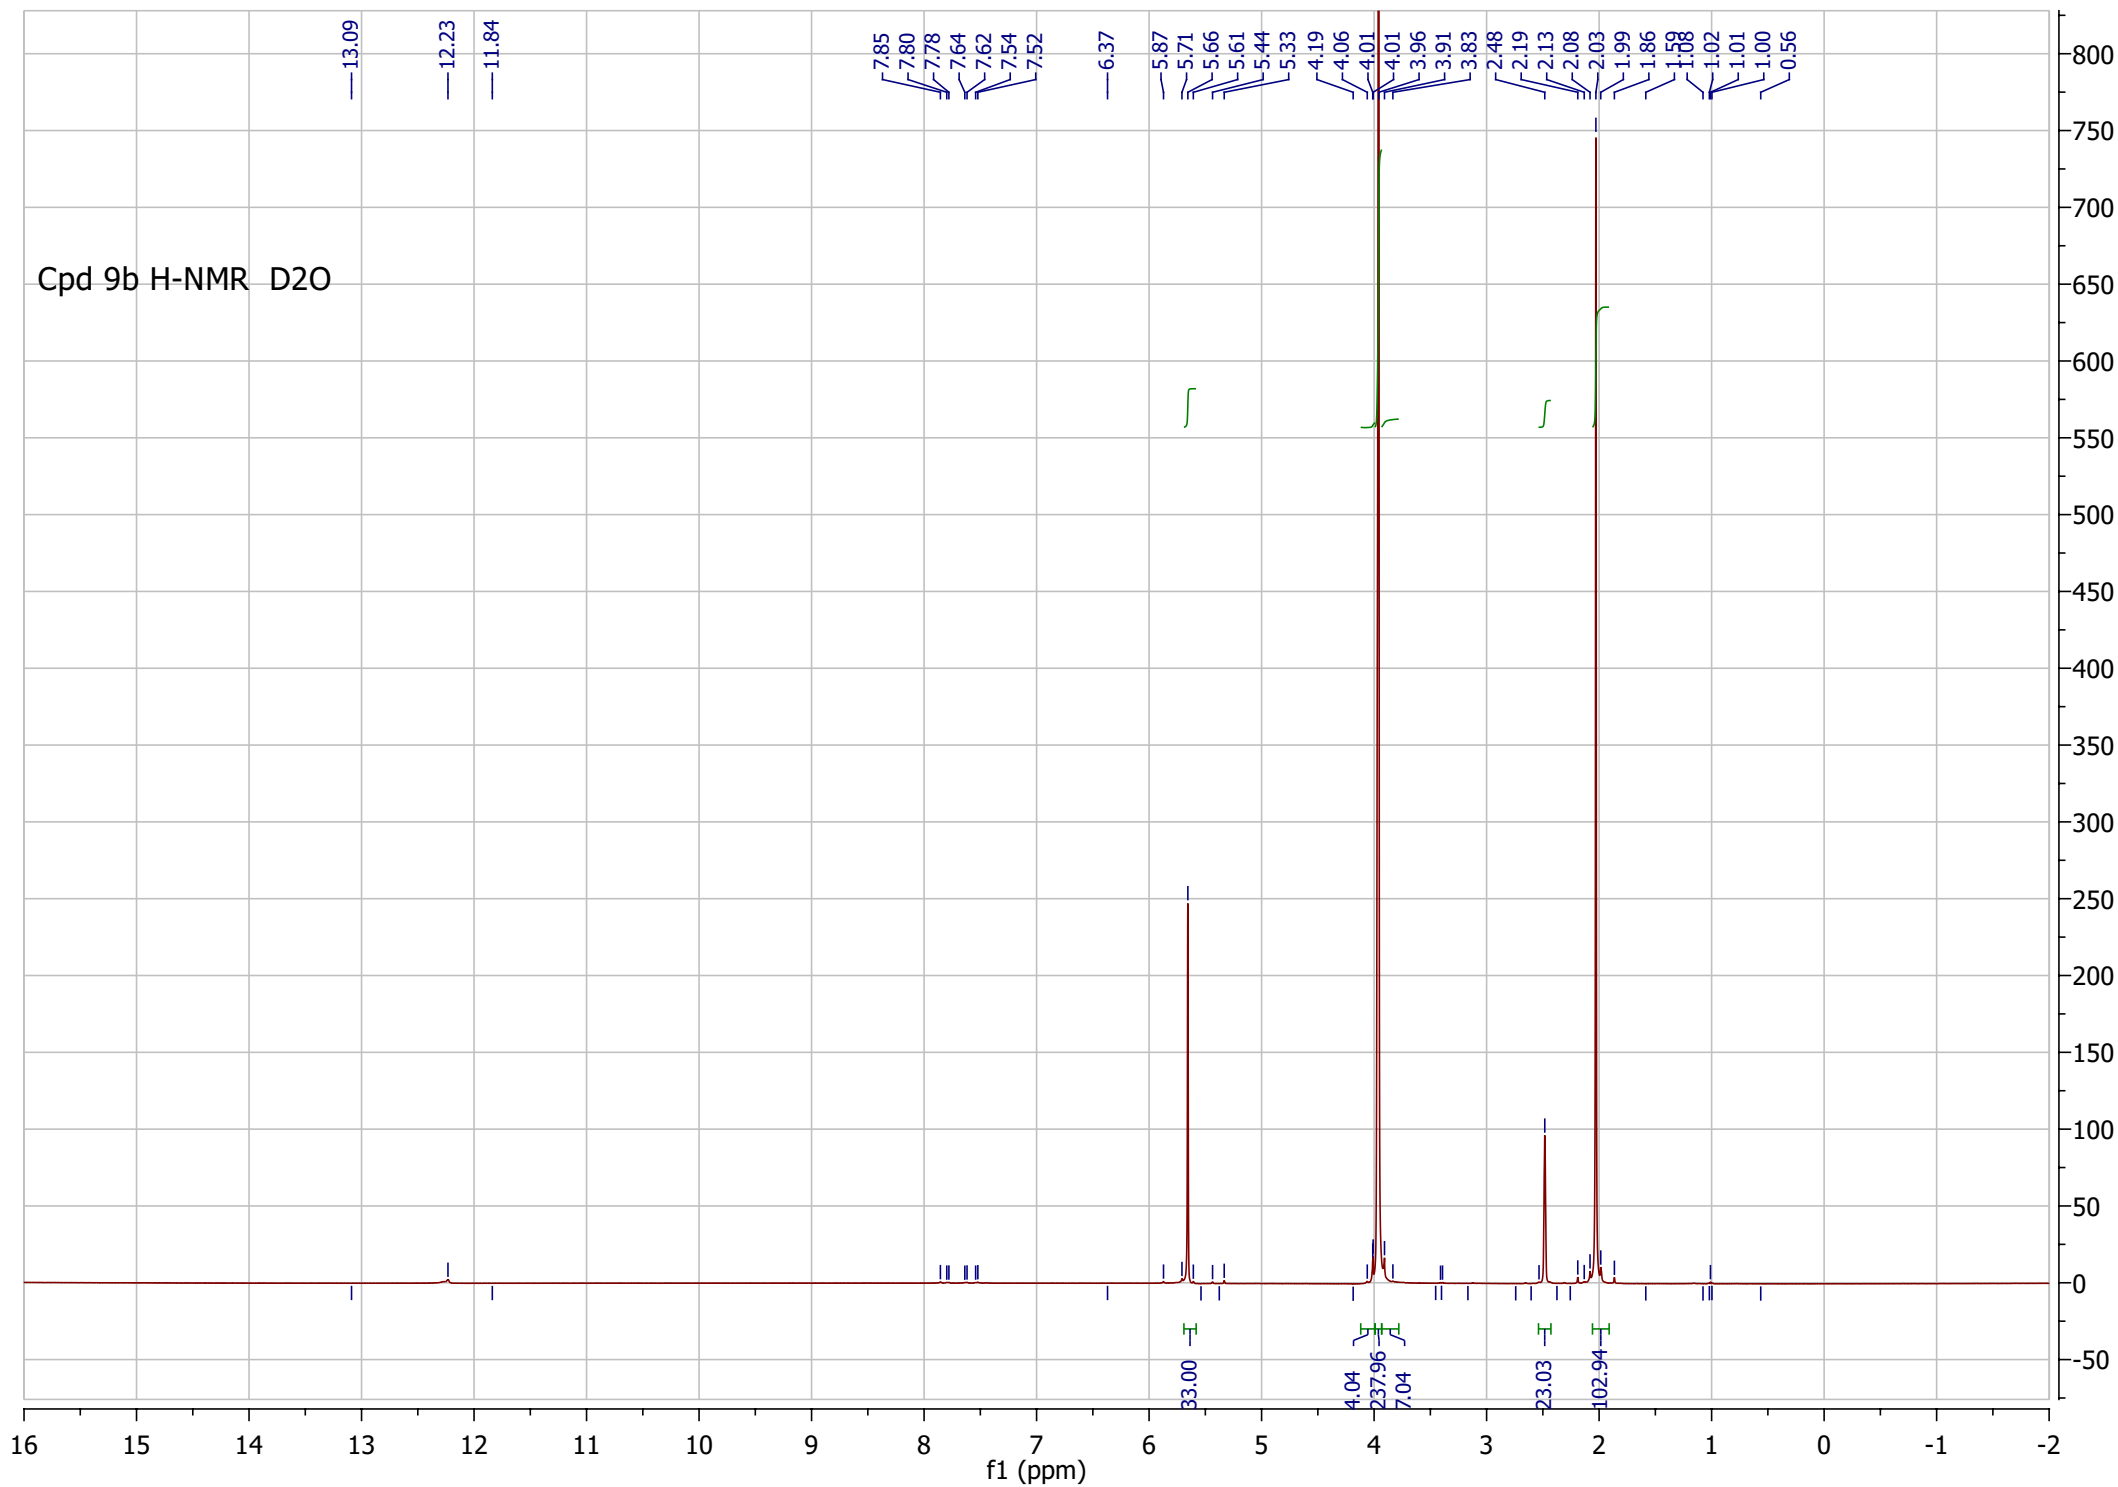

Cpd 9c C13 NMR

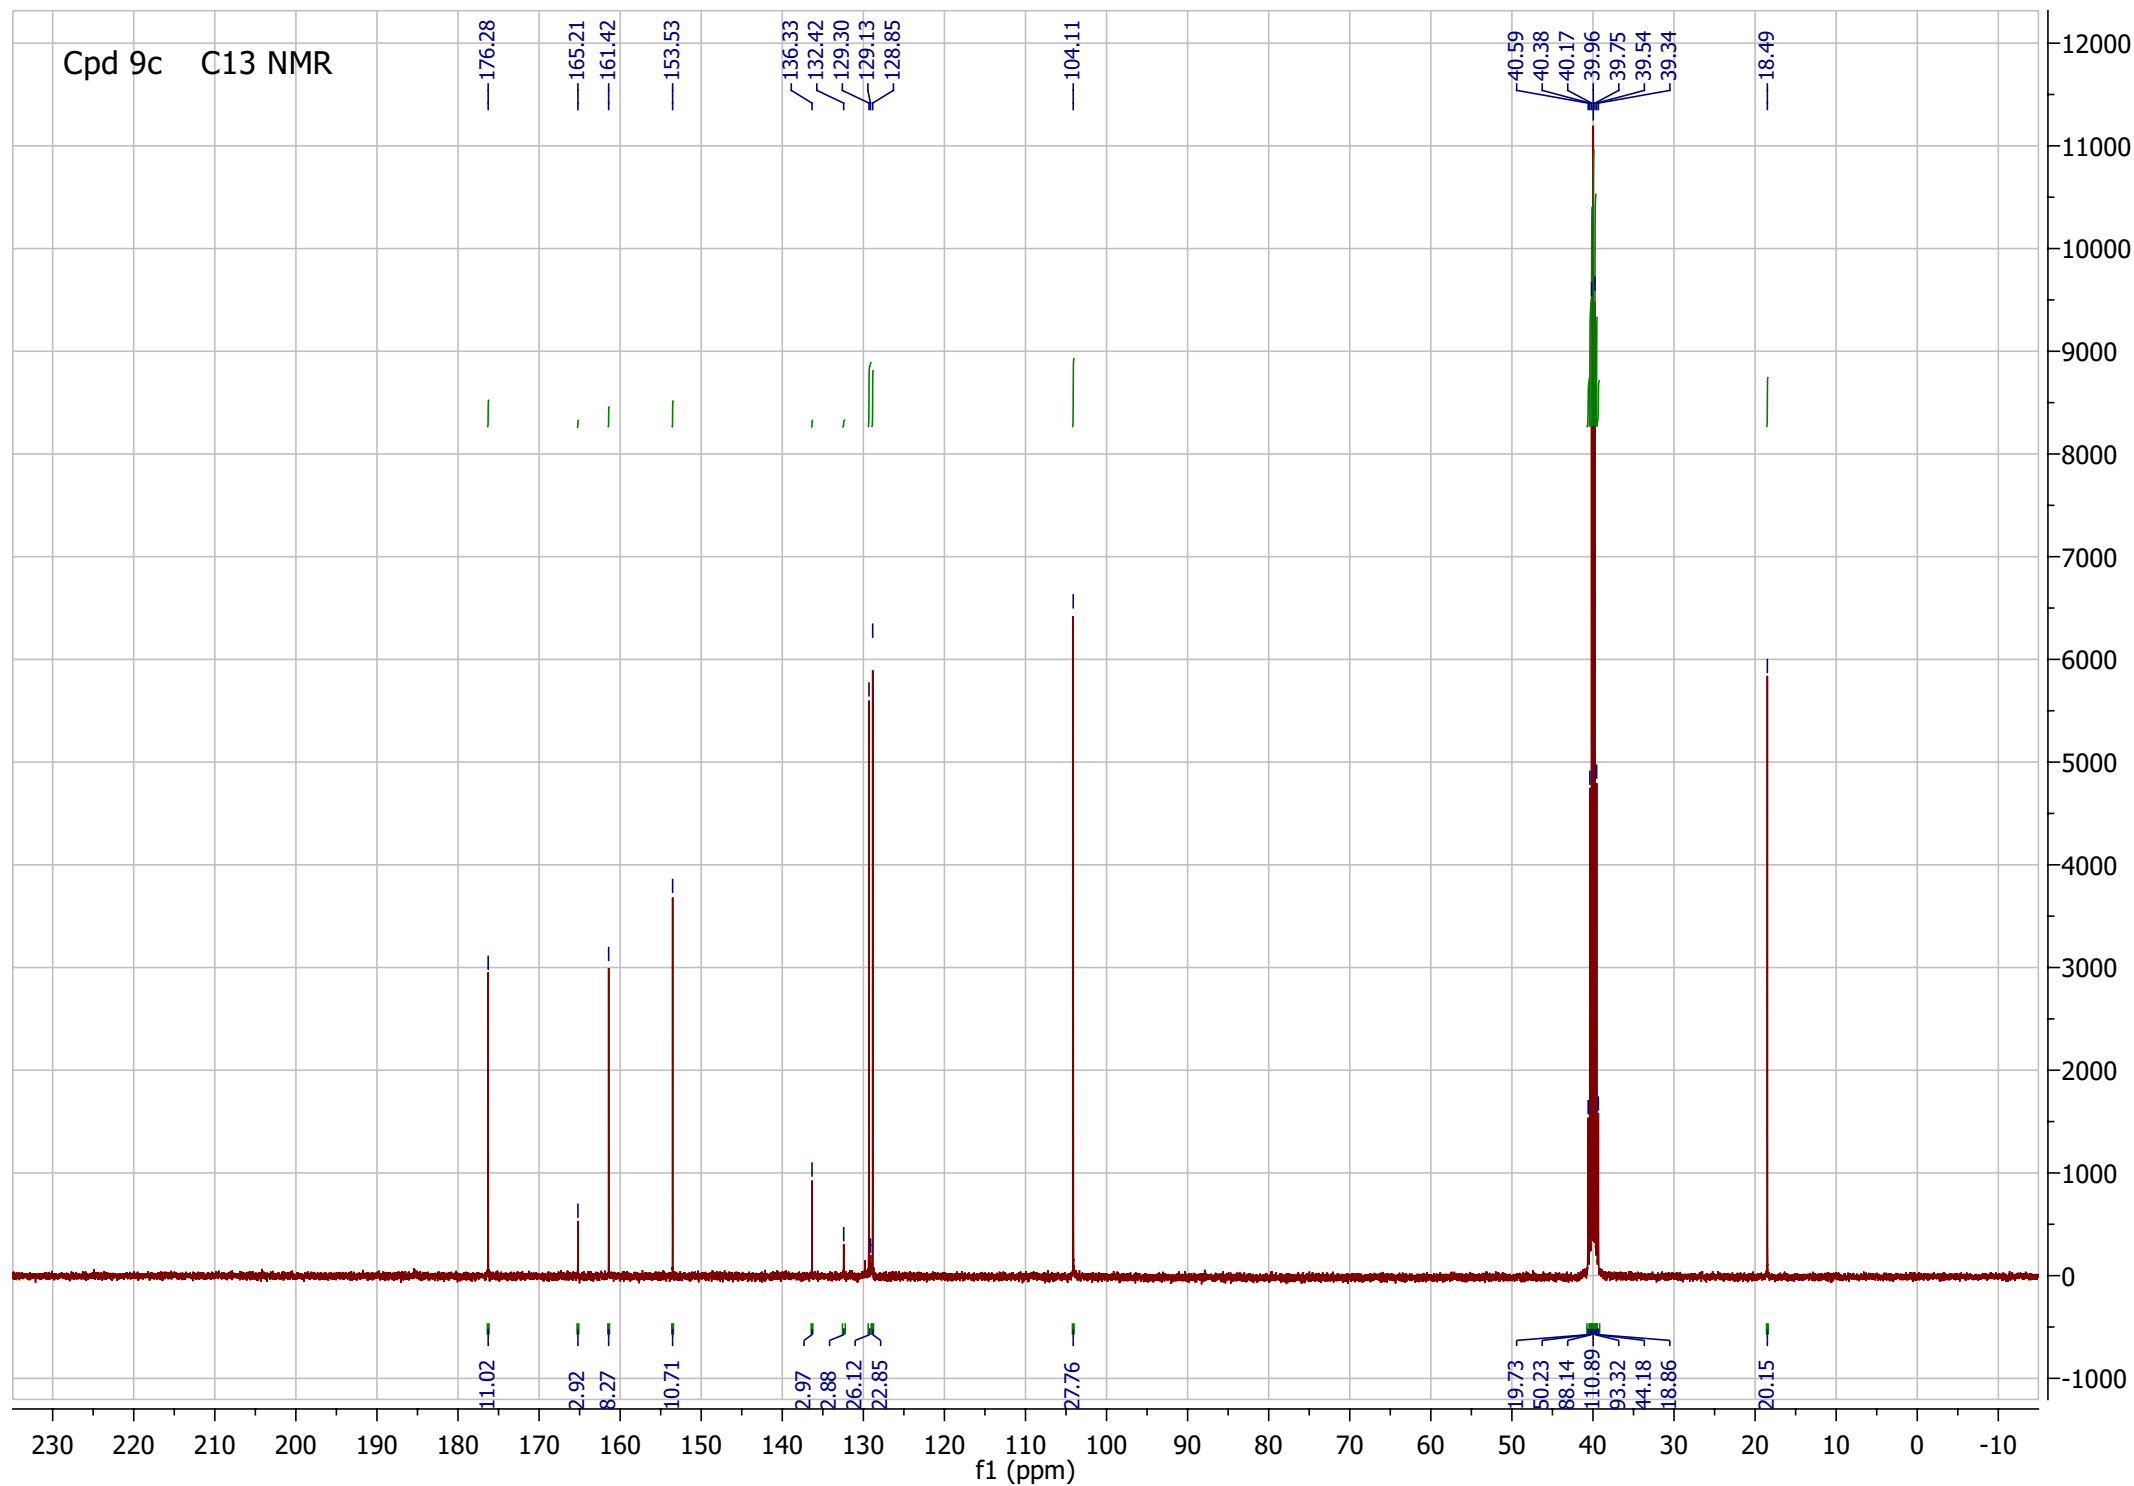

Cpd 9c H-NMR

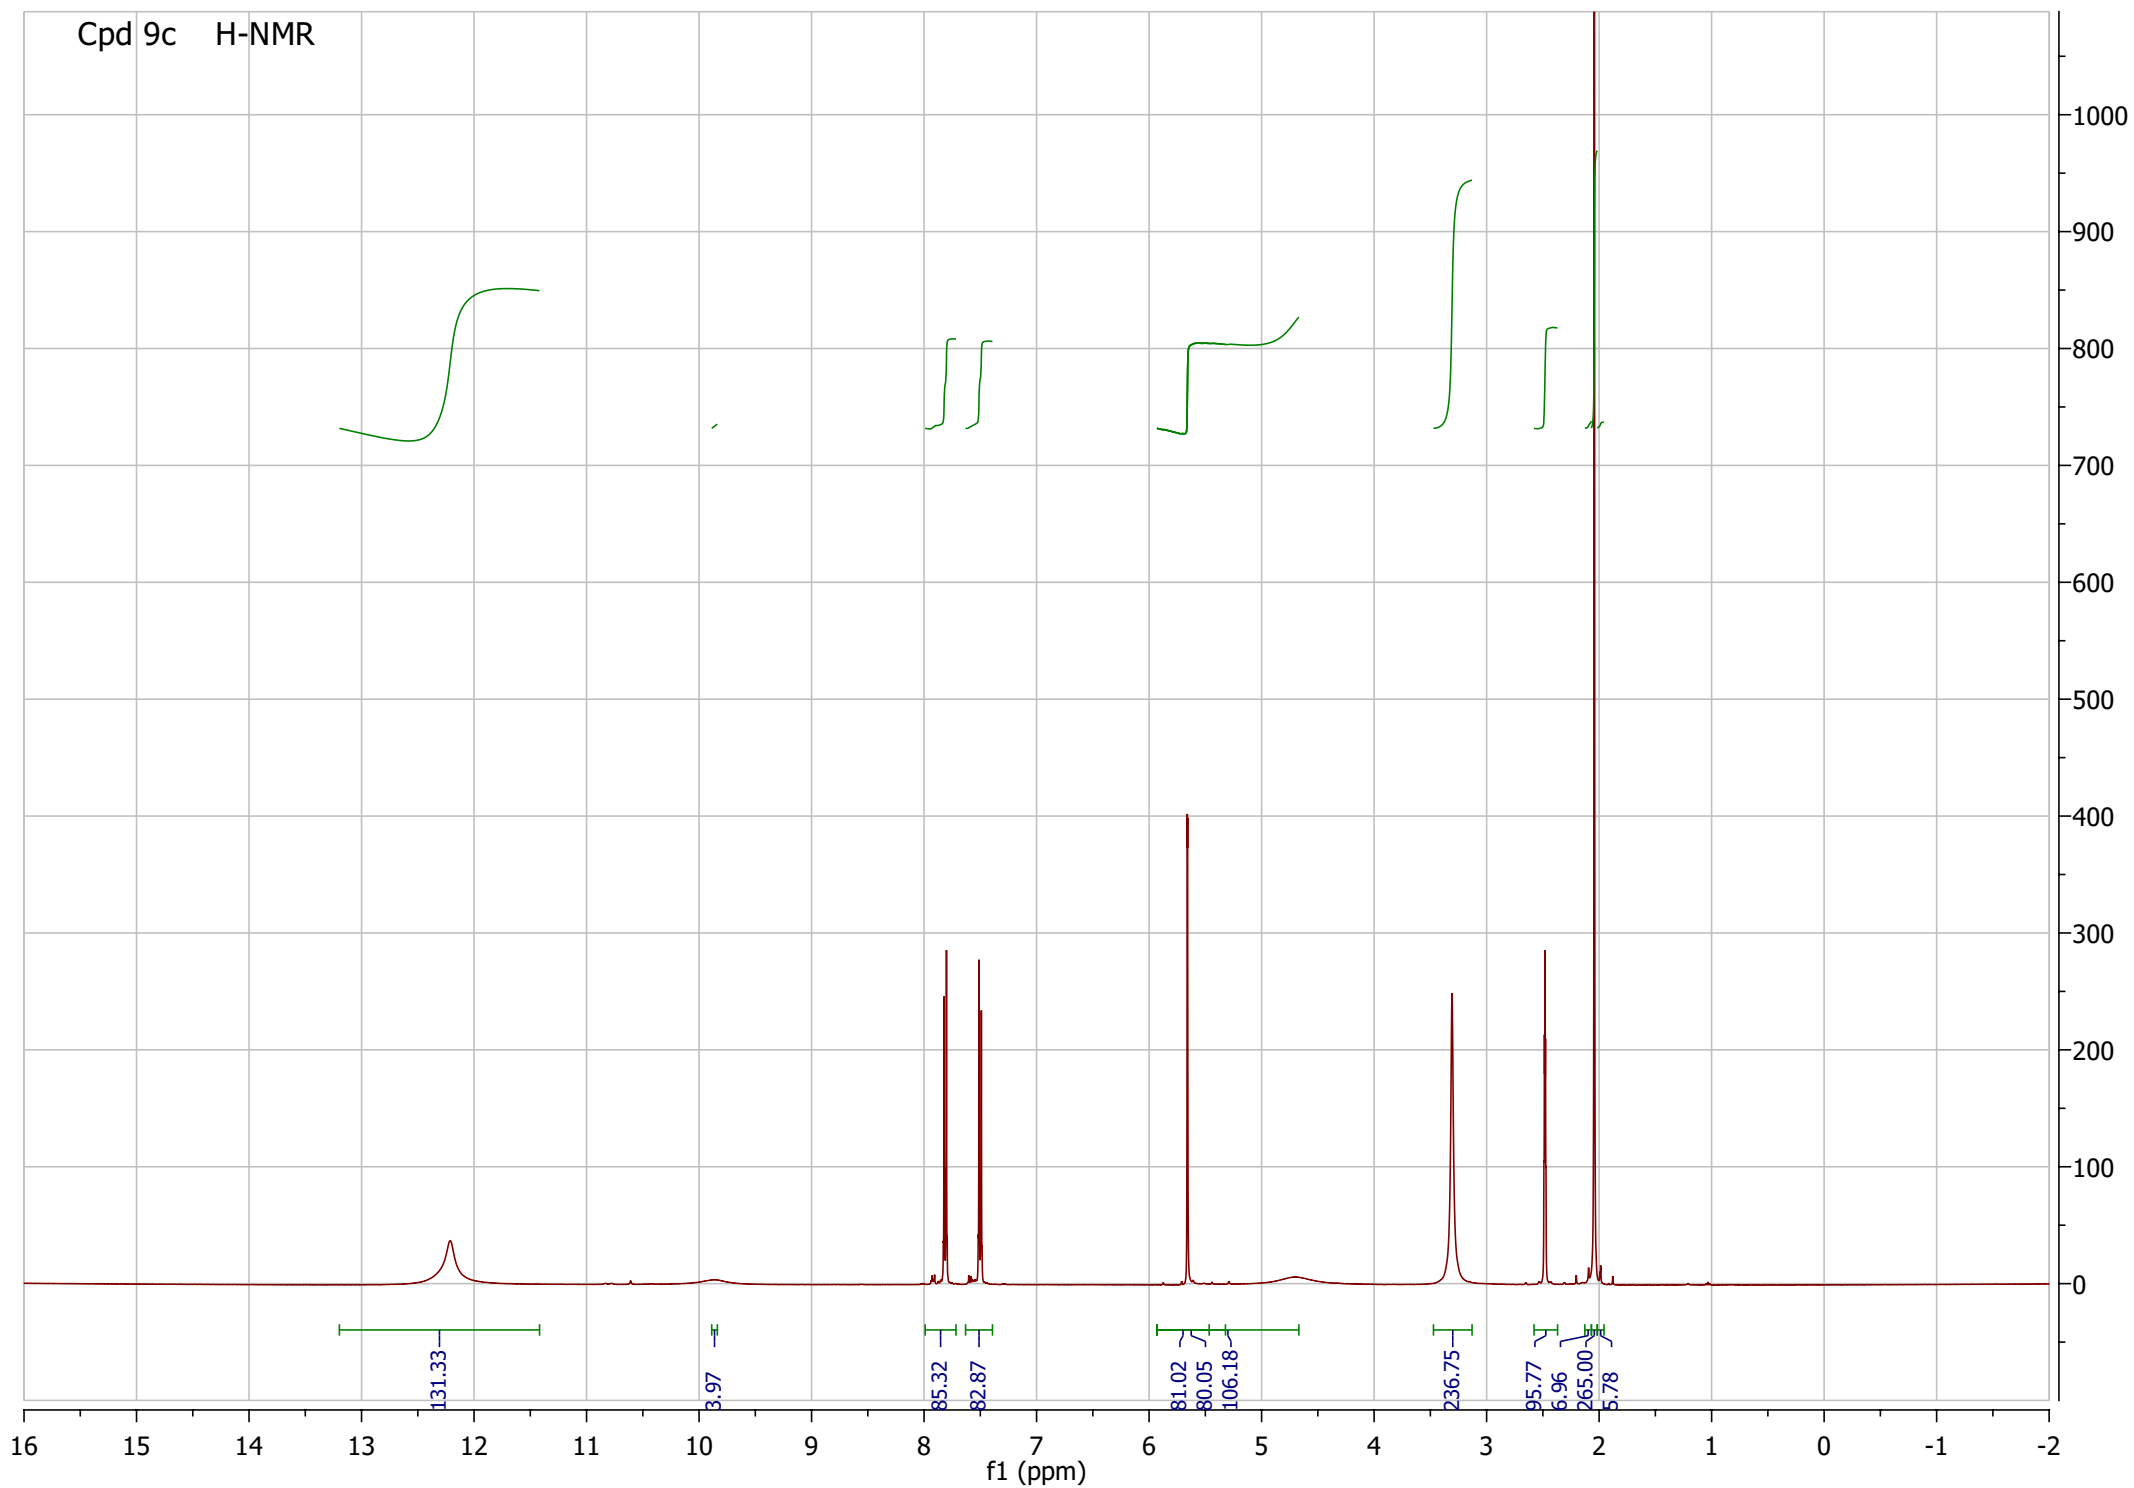

Supplement: s1 [file s1]
